# Supplementary material for: Plasmodium vivax morbidity after radical cure: A cohort study in Central Vietnam
Source: PLoS Med. 2019 May 17;16(5):e1002784. doi: 10.1371/journal.pmed.1002784 (PMC6524795; doi:10.1371/journal.pmed.1002784)
Supplement: S1 Data — (XLSX) [file pmed.1002784.s003.xlsx]

## Sheet: S1_data
id	mondate	date_entry	month_fol	max_montfol	micro	pcr	bodtempt	densft	densfg	densvt	densvg	fetwoday	villid	sex	age	ethnic	educ	occu	eco	agegro	edulev	bnet	season_ent	micro_ev	pcr_ev	sym_ev	year_entry	denstrop0	densgame0	d0vicat	pfbepv	tremal	fal_ev
100203	18392	18364	1	21	neg	neg	36.7	0	0	0	0		1	2	14	1	8	4	1	2	3	2	2	0	0	0	2	3200	920	2	0	0	0
100203	18422	18364	2	21	neg	neg	36.7	0	0	0	0	0	1	2	14	1	8	4	1	2	3	2	2	0	0	0	2	3200	920	2	0	0	0
100203	18452	18364	3	21	neg	neg	37	0	0	0	0	0	1	2	14	1	8	4	1	2	3	2	2	0	0	0	2	3200	920	2	0	0	0
100203	18482	18364	4	21	neg	neg	37.1	0	0	0	0	0	1	2	14	1	8	4	1	2	3	2	2	0	0	0	2	3200	920	2	0	0	0
100203	18512	18364	5	21	neg	neg	37	0	0	0	0	0	1	2	14	1	8	4	1	2	3	2	2	0	0	0	2	3200	920	2	0	0	0
100203	18534	18364	6	21	v	v	38	0	0	2307	32	1	1	2	14	1	8	4	1	2	3	2	2	1	1	1	2	3200	920	2	0	0	0
100203	18572	18364	7	21	neg	neg	37	0	0	0	0	0	1	2	14	1	8	4	1	2	3	2	2	0	0	0	2	3200	920	2	0	0	0
100203	18602	18364	8	21	neg	neg	36.6	0	0	0	0	0	1	2	14	1	8	4	1	2	3	2	2	0	0	0	2	3200	920	2	0	0	0
100203	18632	18364	9	21	neg	neg	37.4	0	0	0	0	0	1	2	14	1	8	4	1	2	3	2	2	0	0	0	2	3200	920	2	0	0	0
100203	18662	18364	10	21	neg	neg	36.6	0	0	0	0	0	1	2	14	1	8	4	1	2	3	2	2	0	0	0	2	3200	920	2	0	0	0
100203	18692	18364	11	21	neg	neg	36.6	0	0	0	0	0	1	2	14	1	8	4	1	2	3	2	2	0	0	0	2	3200	920	2	0	0	0
100203	18722	18364	12	21	neg	neg	36.6	0	0	0	0	0	1	2	14	1	8	4	1	2	3	2	2	0	0	0	2	3200	920	2	0	0	0
100203	18752	18364	13	21	neg	neg	37	0	0	0	0	0	1	2	14	1	8	4	1	2	3	2	2	0	0	0	2	3200	920	2	0	0	0
100203	18782	18364	14	21	neg	neg	36.7	0	0	0	0	0	1	2	14	1	8	4	1	2	3	2	2	0	0	0	2	3200	920	2	0	0	0
100203	18812	18364	15	21	neg	v	37	0	0	0	0	0	1	2	14	1	8	4	1	2	3	2	2	0	1	0	2	3200	920	2	0	0	0
100203	18842	18364	16	21	neg	neg	36.6	0	0	0	0	0	1	2	14	1	8	4	1	2	3	2	2	0	0	0	2	3200	920	2	0	0	0
100203	18872	18364	17	21	neg	v	36.6	0	0	0	0	0	1	2	14	1	8	4	1	2	3	2	2	0	1	0	2	3200	920	2	0	0	0
100203	18902	18364	18	21	neg	v	36.6	0	0	0	0	0	1	2	14	1	8	4	1	2	3	2	2	0	1	0	2	3200	920	2	0	0	0
100203	18932	18364	19	21	neg	neg	37	0	0	0	0	0	1	2	14	1	8	4	1	2	3	2	2	0	0	0	2	3200	920	2	0	0	0
100203	18977	18364	20	21	neg	neg	36.8	0	0	0	0	0	1	2	14	1	8	4	1	2	3	2	2	0	0	0	2	3200	920	2	0	0	0
100203	18992	18364	21	21	neg	neg	37	0	0	0	0	0	1	2	14	1	8	4	1	2	3	2	2	0	0	0	2	3200	920	2	0	0	0
100204	18393	18364	1	21	neg	neg	36.6	0	0	0	0		1	1	12	1	6	4	1	2	3	2	2	0	0	0	2	31320	1800	3	0	0	0
100204	18422	18364	2	21	neg	neg	36.9	0	0	0	0	0	1	1	12	1	6	4	1	2	3	2	2	0	0	0	2	31320	1800	3	0	0	0
100204	18451	18364	3	21	neg	neg	39.5	0	0	0	0	0	1	1	12	1	6	4	1	2	3	2	2	0	0	0	2	31320	1800	3	0	0	0
100204	18482	18364	4	21	neg	neg	37	0	0	0	0	0	1	1	12	1	6	4	1	2	3	2	2	0	0	0	2	31320	1800	3	0	0	0
100204	18512	18364	5	21	neg	v	37	0	0	0	0	1	1	1	12	1	6	4	1	2	3	2	2	0	1	0	2	31320	1800	3	0	0	0
100204	18542	18364	6	21	neg	neg	36.8	0	0	0	0	0	1	1	12	1	6	4	1	2	3	2	2	0	0	0	2	31320	1800	3	0	0	0
100204	18572	18364	7	21	neg	neg	37.2	0	0	0	0	0	1	1	12	1	6	4	1	2	3	2	2	0	0	0	2	31320	1800	3	0	0	0
100204	18601	18364	8	21	neg	v	37.2	0	0	0	0	0	1	1	12	1	6	4	1	2	3	2	2	0	1	0	2	31320	1800	3	0	0	0
100204	18632	18364	9	21	f	f	37.3	2840	0	0	0	0	1	1	12	1	6	4	1	2	3	2	2	0	0	0	2	31320	1800	3	0	0	1
100204	18662	18364	10	21	neg	neg	36.6	0	0	0	0	0	1	1	12	1	6	4	1	2	3	2	2	0	0	0	2	31320	1800	3	0	0	0
100204	18692	18364	11	21	neg	neg	36.9	0	0	0	0	0	1	1	12	1	6	4	1	2	3	2	2	0	0	0	2	31320	1800	3	0	0	0
100204	18722	18364	12	21	neg	neg	36.6	0	0	0	0	0	1	1	12	1	6	4	1	2	3	2	2	0	0	0	2	31320	1800	3	0	0	0
100204	18752	18364	13	21	neg	neg	36.7	0	0	0	0	0	1	1	12	1	6	4	1	2	3	2	2	0	0	0	2	31320	1800	3	0	0	0
100204	18782	18364	14	21	neg	v	36.8	0	0	0	0	0	1	1	12	1	6	4	1	2	3	2	2	0	1	0	2	31320	1800	3	0	0	0
100204	18812	18364	15	21	neg	v	36.6	0	0	0	0	0	1	1	12	1	6	4	1	2	3	2	2	0	1	0	2	31320	1800	3	0	0	0
100204	18842	18364	16	21	neg	neg	36.6	0	0	0	0	0	1	1	12	1	6	4	1	2	3	2	2	0	0	0	2	31320	1800	3	0	0	0
100204	18872	18364	17	21	neg	neg	36.9	0	0	0	0	0	1	1	12	1	6	4	1	2	3	2	2	0	0	0	2	31320	1800	3	0	0	0
100204	18902	18364	18	21	neg	neg	36.6	0	0	0	0	0	1	1	12	1	6	4	1	2	3	2	2	0	0	0	2	31320	1800	3	0	0	0
100204	18932	18364	19	21	neg	neg	36.9	0	0	0	0	0	1	1	12	1	6	4	1	2	3	2	2	0	0	0	2	31320	1800	3	0	0	0
100204	18962	18364	20	21	neg	neg	36.8	0	0	0	0	0	1	1	12	1	6	4	1	2	3	2	2	0	0	0	2	31320	1800	3	0	0	0
100204	18992	18364	21	21	neg	neg	36.8	0	0	0	0	0	1	1	12	1	6	4	1	2	3	2	2	0	0	0	2	31320	1800	3	0	0	0
100207	18256	18228	1	24	neg	neg	36.6	0	0	0	0		1	1	4	1	0	0	1	1	1	2	1	0	0	0	1	144	16	1	0	0	0
100207	18286	18228	2	24	v	v	37.5	0	0	380	40	1	1	1	4	1	0	0	1	1	1	2	1	1	1	1	1	144	16	1	0	0	0
100207	18316	18228	3	24	neg	neg	37.7	0	0	0	0	1	1	1	4	1	0	0	1	1	1	2	1	0	0	0	1	144	16	1	0	0	0
100207	18346	18228	4	24	neg	neg	36.6	0	0	0	0	0	1	1	4	1	0	0	1	1	1	2	1	0	0	0	1	144	16	1	0	0	0
100207	18376	18228	5	24	neg	neg	36.8	0	0	0	0	0	1	1	4	1	0	0	1	1	1	2	1	0	0	0	1	144	16	1	0	0	0
100207	18406	18228	6	24	neg	neg	36.5	0	0	0	0	0	1	1	4	1	0	0	1	1	1	2	1	0	0	0	1	144	16	1	0	0	0
100207	18436	18228	7	24	f	f	40	20000	0	0	0	0	1	1	4	1	0	0	1	1	1	2	1	0	0	0	1	144	16	1	0	0	1
100207	18466	18228	8	24	neg	neg	37.3	0	0	0	0	0	1	1	4	1	0	0	1	1	1	2	1	0	0	0	1	144	16	1	0	0	0
100207	18496	18228	9	24	neg	neg	37.3	0	0	0	0	0	1	1	4	1	0	0	1	1	1	2	1	0	0	0	1	144	16	1	0	0	0
100207	18526	18228	10	24	neg	neg	37	0	0	0	0	0	1	1	4	1	0	0	1	1	1	2	1	0	0	0	1	144	16	1	0	0	0
100207	18556	18228	11	24	neg	neg	37.4	0	0	0	0	0	1	1	4	1	0	0	1	1	1	2	1	0	0	0	1	144	16	1	0	0	0
100207	18586	18228	12	24	neg	neg	36.7	0	0	0	0	0	1	1	4	1	0	0	1	1	1	2	1	0	0	0	1	144	16	1	0	0	0
100207	18616	18228	13	24	v	v	37.8	0	0	840	0	0	1	1	4	1	0	0	1	1	1	2	1	1	1	1	1	144	16	1	0	0	0
100207	18646	18228	14	24	neg	neg	37.1	0	0	0	0	0	1	1	4	1	0	0	1	1	1	2	1	0	0	0	1	144	16	1	0	0	0
100207	18676	18228	15	24	neg	v	36.6	0	0	0	0	0	1	1	4	1	0	0	1	1	1	2	1	0	1	0	1	144	16	1	0	0	0
100207	18706	18228	16	24	neg	v	36.6	0	0	0	0	0	1	1	4	1	0	0	1	1	1	2	1	0	1	0	1	144	16	1	0	0	0
100207	18736	18228	17	24	neg	v	36.7	0	0	0	0	0	1	1	4	1	0	0	1	1	1	2	1	0	1	0	1	144	16	1	0	0	0
100207	18766	18228	18	24	neg	v	36.7	0	0	0	0	0	1	1	4	1	0	0	1	1	1	2	1	0	1	0	1	144	16	1	0	0	0
100207	18796	18228	19	24	neg	neg	36.7	0	0	0	0	0	1	1	4	1	0	0	1	1	1	2	1	0	0	0	1	144	16	1	0	0	0
100207	18826	18228	20	24	neg	neg	37	0	0	0	0	0	1	1	4	1	0	0	1	1	1	2	1	0	0	0	1	144	16	1	0	0	0
100207	18856	18228	21	24	neg	v	36.5	0	0	0	0	0	1	1	4	1	0	0	1	1	1	2	1	0	1	0	1	144	16	1	0	0	0
100207	18886	18228	22	24	neg	neg	36.5	0	0	0	0	0	1	1	4	1	0	0	1	1	1	2	1	0	0	0	1	144	16	1	0	0	0
100207	18916	18228	23	24	neg	neg	37	0	0	0	0	0	1	1	4	1	0	0	1	1	1	2	1	0	0	0	1	144	16	1	0	0	0
100207	18946	18228	24	24	neg	v	37	0	0	0	0	0	1	1	4	1	0	0	1	1	1	2	1	0	1	0	1	144	16	1	0	0	0
100303	18437	18409	1	17	neg	neg	37.3	0	0	0	0		1	1	27	1	7	1	3	3	3	1	2	0	0	0	2	13200	0	3	0	0	0
100303	18467	18409	2	17	neg	neg	37	0	0	0	0	0	1	1	27	1	7	1	3	3	3	1	2	0	0	0	2	13200	0	3	0	0	0
100303	18497	18409	3	17	neg	neg	37	0	0	0	0	0	1	1	27	1	7	1	3	3	3	1	2	0	0	0	2	13200	0	3	0	0	0
100303	18527	18409	4	17	neg	neg	36.9	0	0	0	0	0	1	1	27	1	7	1	3	3	3	1	2	0	0	0	2	13200	0	3	0	0	0
100303	18557	18409	5	17	neg	neg	36.9	0	0	0	0	0	1	1	27	1	7	1	3	3	3	1	2	0	0	0	2	13200	0	3	0	0	0
100303	18587	18409	6	17	neg	neg	37	0	0	0	0	0	1	1	27	1	7	1	3	3	3	1	2	0	0	0	2	13200	0	3	0	0	0
100303	18617	18409	7	17	neg	neg	36.9	0	0	0	0	0	1	1	27	1	7	1	3	3	3	1	2	0	0	0	2	13200	0	3	0	0	0
100303	18647	18409	8	17	neg	neg	36.7	0	0	0	0	0	1	1	27	1	7	1	3	3	3	1	2	0	0	0	2	13200	0	3	0	0	0
100303	18677	18409	9	17	neg	neg	36.7	0	0	0	0	0	1	1	27	1	7	1	3	3	3	1	2	0	0	0	2	13200	0	3	0	0	0
100303	18707	18409	10	17	neg	v	36.6	0	0	0	0	0	1	1	27	1	7	1	3	3	3	1	2	0	1	0	2	13200	0	3	0	0	0
100303	18737	18409	11	17	neg	neg	36.6	0	0	0	0	0	1	1	27	1	7	1	3	3	3	1	2	0	0	0	2	13200	0	3	0	0	0
100303	18767	18409	12	17	neg	neg	36.6	0	0	0	0	0	1	1	27	1	7	1	3	3	3	1	2	0	0	0	2	13200	0	3	0	0	0
100303	18797	18409	13	17	neg	neg	37	0	0	0	0	0	1	1	27	1	7	1	3	3	3	1	2	0	0	0	2	13200	0	3	0	0	0
100303	18827	18409	14	17	neg	neg	36.6	0	0	0	0	0	1	1	27	1	7	1	3	3	3	1	2	0	0	0	2	13200	0	3	0	0	0
100303	18857	18409	15	17	neg	neg	36.6	0	0	0	0	0	1	1	27	1	7	1	3	3	3	1	2	0	0	0	2	13200	0	3	0	0	0
100303	18887	18409	16	17	neg	neg	36.6	0	0	0	0	0	1	1	27	1	7	1	3	3	3	1	2	0	0	0	2	13200	0	3	0	0	0
100303	18917	18409	17	17	neg	neg	37	0	0	0	0	0	1	1	27	1	7	1	3	3	3	1	2	0	0	0	2	13200	0	3	0	0	0
100305	18240	18212	1	24	neg	neg	36.7	0	0	0	0		1	2	13	1	7	4	3	2	3	1	1	0	0	0	1	9840	280	3	0	0	0
100305	18264	18212	2	24	neg	v	39.8	34482	0	0	0	0	1	2	13	1	7	4	3	2	3	1	1	0	1	0	1	9840	280	3	0	0	0
100305	18300	18212	3	24	neg	neg	36.8	0	0	0	0	0	1	2	13	1	7	4	3	2	3	1	1	0	0	0	1	9840	280	3	0	0	0
100305	18330	18212	4	24	neg	neg	36.5	0	0	0	0	0	1	2	13	1	7	4	3	2	3	1	1	0	0	0	1	9840	280	3	0	0	0
100305	18360	18212	5	24	neg	neg	36.6	0	0	0	0	0	1	2	13	1	7	4	3	2	3	1	1	0	0	0	1	9840	280	3	0	0	0
100305	18390	18212	6	24	neg	neg	36.7	0	0	0	0	0	1	2	13	1	7	4	3	2	3	1	1	0	0	0	1	9840	280	3	0	0	0
100305	18420	18212	7	24	neg	neg	36.5	0	0	0	0	0	1	2	13	1	7	4	3	2	3	1	1	0	0	0	1	9840	280	3	0	0	0
100305	18429	18212	8	24	v	v	36.5	0	0	7880	1040	0	1	2	13	1	7	4	3	2	3	1	1	1	1	0	1	9840	280	3	0	0	0
100305	18480	18212	9	24	neg	neg	37	0	0	0	0	0	1	2	13	1	7	4	3	2	3	1	1	0	0	0	1	9840	280	3	0	0	0
100305	18510	18212	10	24	neg	neg	36.6	0	0	0	0	0	1	2	13	1	7	4	3	2	3	1	1	0	0	0	1	9840	280	3	0	0	0
100305	18540	18212	11	24	neg	neg	36.6	0	0	0	0	0	1	2	13	1	7	4	3	2	3	1	1	0	0	0	1	9840	280	3	0	0	0
100305	18570	18212	12	24	neg	v	37	0	0	0	0	0	1	2	13	1	7	4	3	2	3	1	1	0	1	0	1	9840	280	3	0	0	0
100305	18600	18212	13	24	neg	neg	36.9	0	0	0	0	0	1	2	13	1	7	4	3	2	3	1	1	0	0	0	1	9840	280	3	0	0	0
100305	18630	18212	14	24	neg	v	36.8	0	0	0	0	0	1	2	13	1	7	4	3	2	3	1	1	0	1	0	1	9840	280	3	0	0	0
100305	18660	18212	15	24	neg	v	36.7	0	0	0	0	0	1	2	13	1	7	4	3	2	3	1	1	0	1	0	1	9840	280	3	0	0	0
100305	18690	18212	16	24	neg	neg	36.7	0	0	0	0	0	1	2	13	1	7	4	3	2	3	1	1	0	0	0	1	9840	280	3	0	0	0
100305	18718	18212	17	24	neg	neg	36.6	0	0	0	0	0	1	2	13	1	7	4	3	2	3	1	1	0	0	0	1	9840	280	3	0	0	0
100305	18750	18212	18	24	neg	neg	37	0	0	0	0	0	1	2	13	1	7	4	3	2	3	1	1	0	0	0	1	9840	280	3	0	0	0
100305	18780	18212	19	24	neg	neg	36.8	0	0	0	0	0	1	2	13	1	7	4	3	2	3	1	1	0	0	0	1	9840	280	3	0	0	0
100305	18810	18212	20	24	v	v	36.8	0	0	1240	280	0	1	2	13	1	7	4	3	2	3	1	1	1	1	0	1	9840	280	3	0	0	0
100305	18840	18212	21	24	neg	v	36.8	0	0	0	0	0	1	2	13	1	7	4	3	2	3	1	1	0	1	0	1	9840	280	3	0	1	0
100305	18870	18212	22	24	neg	neg	36.8	0	0	0	0	0	1	2	13	1	7	4	3	2	3	1	1	0	0	0	1	9840	280	3	0	0	0
100305	18900	18212	23	24	neg	v	36.5	0	0	0	0	0	1	2	13	1	7	4	3	2	3	1	1	0	1	0	1	9840	280	3	0	0	0
100305	18930	18212	24	24	neg	neg	36.6	0	0	0	0	0	1	2	13	1	7	4	3	2	3	1	1	0	0	0	1	9840	280	3	0	0	0
100306	18080	18052	1	24	neg	neg	36.8	0	0	0	0		1	2	12	1	6	4	3	2	3	1	2	0	0	0	1	15600	1440	3	0	0	0
100306	18110	18052	2	24	neg	neg	36.8	0	0	0	0	0	1	2	12	1	6	4	3	2	3	1	2	0	0	0	1	15600	1440	3	0	0	0
100306	18140	18052	3	24	neg	neg	37	0	0	0	0	0	1	2	12	1	6	4	3	2	3	1	2	0	0	0	1	15600	1440	3	0	0	0
100306	18170	18052	4	24	neg	neg	36.6	0	0	0	0	0	1	2	12	1	6	4	3	2	3	1	2	0	0	0	1	15600	1440	3	0	0	0
100306	18200	18052	5	24	f	f	36.8	0	40	0	0	0	1	2	12	1	6	4	3	2	3	1	2	0	0	0	1	15600	1440	3	0	0	1
100306	18230	18052	6	24	neg	neg	36.5	0	0	0	0	0	1	2	12	1	6	4	3	2	3	1	2	0	0	0	1	15600	1440	3	0	0	0
100306	18260	18052	7	24	neg	neg	36.5	0	0	0	0	0	1	2	12	1	6	4	3	2	3	1	2	0	0	0	1	15600	1440	3	0	0	0
100306	18290	18052	8	24	v	v	38.5	0	0	6360	120	0	1	2	12	1	6	4	3	2	3	1	2	1	1	1	1	15600	1440	3	0	0	0
100306	18320	18052	9	24	v	v	37.6	0	0	62500	4800	0	1	2	12	1	6	4	3	2	3	1	2	1	1	1	1	15600	1440	3	0	1	0
100306	18350	18052	10	24	neg	neg	36.8	0	0	0	0	0	1	2	12	1	6	4	3	2	3	1	2	0	0	0	1	15600	1440	3	0	0	0
100306	18363	18052	11	24	v	v	40.5	0	0	52000	2000	0	1	2	12	1	6	4	3	2	3	1	2	1	1	1	1	15600	1440	3	0	0	0
100306	18410	18052	12	24	v	v	36.7	0	0	1040	160	0	1	2	12	1	6	4	3	2	3	1	2	1	1	0	1	15600	1440	3	0	1	0
100306	18440	18052	13	24	neg	neg	36.9	0	0	0	0	0	1	2	12	1	6	4	3	2	3	1	2	0	0	0	1	15600	1440	3	0	0	0
100306	18458	18052	14	24	v	v	38	0	0	27310	275	1	1	2	12	1	6	4	3	2	3	1	2	1	1	1	1	15600	1440	3	0	0	0
100306	18500	18052	15	24	v	v	37.5	0	0	216	0	0	1	2	12	1	6	4	3	2	3	1	2	1	1	1	1	15600	1440	3	0	1	0
100306	18530	18052	16	24	neg	neg	37	0	0	0	0	1	1	2	12	1	6	4	3	2	3	1	2	0	0	0	1	15600	1440	3	0	0	0
100306	18560	18052	17	24	neg	v	37	0	0	0	0	0	1	2	12	1	6	4	3	2	3	1	2	0	1	0	1	15600	1440	3	0	0	0
100306	18590	18052	18	24	neg	neg	36.8	0	0	0	0	0	1	2	12	1	6	4	3	2	3	1	2	0	0	0	1	15600	1440	3	0	0	0
100306	18620	18052	19	24	neg	neg	37.2	0	0	0	0	0	1	2	12	1	6	4	3	2	3	1	2	0	0	0	1	15600	1440	3	0	0	0
100306	18650	18052	20	24	neg	neg	36.7	0	0	0	0	0	1	2	12	1	6	4	3	2	3	1	2	0	0	0	1	15600	1440	3	0	0	0
100306	18680	18052	21	24	neg	v	36.6	0	0	0	0	0	1	2	12	1	6	4	3	2	3	1	2	0	1	0	1	15600	1440	3	0	0	0
100306	18710	18052	22	24	neg	neg	36.6	0	0	0	0	0	1	2	12	1	6	4	3	2	3	1	2	0	0	0	1	15600	1440	3	0	0	0
100306	18740	18052	23	24	neg	v	37	0	0	0	0	0	1	2	12	1	6	4	3	2	3	1	2	0	1	0	1	15600	1440	3	0	0	0
100306	18770	18052	24	24	neg	neg	36.7	0	0	0	0	0	1	2	12	1	6	4	3	2	3	1	2	0	0	0	1	15600	1440	3	0	0	0
100401	18070	18042	1	24	neg	neg	36.8	0	0	0	0		1	1	32	1	5	1	1	4	2	1	2	0	0	0	1	1400	288	2	0	0	0
100401	18100	18042	2	24	neg	neg	36.8	0	0	0	0	0	1	1	32	1	5	1	1	4	2	1	2	0	0	0	1	1400	288	2	0	0	0
100401	18130	18042	3	24	neg	neg	36.8	0	0	0	0	0	1	1	32	1	5	1	1	4	2	1	2	0	0	0	1	1400	288	2	0	0	0
100401	18160	18042	4	24	neg	neg	36.5	0	0	0	0	0	1	1	32	1	5	1	1	4	2	1	2	0	0	0	1	1400	288	2	0	0	0
100401	18190	18042	5	24	neg	neg	37.1	0	0	0	0	0	1	1	32	1	5	1	1	4	2	1	2	0	0	0	1	1400	288	2	0	0	0
100401	18220	18042	6	24	neg	neg	37	0	0	0	0	0	1	1	32	1	5	1	1	4	2	1	2	0	0	0	1	1400	288	2	0	0	0
100401	18250	18042	7	24	neg	neg	37	0	0	0	0	0	1	1	32	1	5	1	1	4	2	1	2	0	0	0	1	1400	288	2	0	0	0
100401	18278	18042	8	24	v	v	37.8	0	0	18240	960	0	1	1	32	1	5	1	1	4	2	1	2	1	1	1	1	1400	288	2	0	0	0
100401	18311	18042	9	24	neg	neg	37	0	0	0	0	0	1	1	32	1	5	1	1	4	2	1	2	0	0	0	1	1400	288	2	0	0	0
100401	18340	18042	10	24	neg	neg	36.6	0	0	0	0	0	1	1	32	1	5	1	1	4	2	1	2	0	0	0	1	1400	288	2	0	0	0
100401	18370	18042	11	24	neg	v	36.9	0	0	0	0	0	1	1	32	1	5	1	1	4	2	1	2	0	1	0	1	1400	288	2	0	0	0
100401	18400	18042	12	24	neg	neg	37.1	0	0	0	0	0	1	1	32	1	5	1	1	4	2	1	2	0	0	0	1	1400	288	2	0	0	0
100401	18430	18042	13	24	neg	neg	36.6	0	0	0	0	0	1	1	32	1	5	1	1	4	2	1	2	0	0	0	1	1400	288	2	0	0	0
100401	18460	18042	14	24	neg	neg	37.1	0	0	0	0	0	1	1	32	1	5	1	1	4	2	1	2	0	0	0	1	1400	288	2	0	0	0
100401	18490	18042	15	24	neg	f	36.6	0	0	0	0	0	1	1	32	1	5	1	1	4	2	1	2	0	0	0	1	1400	288	2	0	0	0
100401	18495	18042	16	24	f	fv	37	11900	0	0	0	0	1	1	32	1	5	1	1	4	2	1	2	0	1	0	1	1400	288	2	1	0	1
100401	18550	18042	17	24	neg	neg	37	0	0	0	0	0	1	1	32	1	5	1	1	4	2	1	2	0	0	0	1	1400	288	2	0	0	0
100401	18580	18042	18	24	neg	neg	36.8	0	0	0	0	0	1	1	32	1	5	1	1	4	2	1	2	0	0	0	1	1400	288	2	0	0	0
100401	18610	18042	19	24	neg	neg	37.1	0	0	0	0	0	1	1	32	1	5	1	1	4	2	1	2	0	0	0	1	1400	288	2	0	0	0
100401	18640	18042	20	24	neg	neg	36.7	0	0	0	0	0	1	1	32	1	5	1	1	4	2	1	2	0	0	0	1	1400	288	2	0	0	0
100401	18670	18042	21	24	neg	neg	36.7	0	0	0	0	0	1	1	32	1	5	1	1	4	2	1	2	0	0	0	1	1400	288	2	0	0	0
100401	18700	18042	22	24	neg	v	36.6	0	0	0	0	0	1	1	32	1	5	1	1	4	2	1	2	0	1	0	1	1400	288	2	0	0	0
100401	18730	18042	23	24	neg	v	37	0	0	0	0	0	1	1	32	1	5	1	1	4	2	1	2	0	1	0	1	1400	288	2	0	0	0
100401	18760	18042	24	24	neg	v	36.9	0	0	0	0	0	1	1	32	1	5	1	1	4	2	1	2	0	1	0	1	1400	288	2	0	0	0
100501	18238	18210	1	24	neg	neg	36.8	0	0	0	0		1	1	32	1	3	1	1	4	2	1	1	0	0	0	1	1240	200	2	0	0	0
100501	18268	18210	2	24	neg	neg	36.7	0	0	0	0	0	1	1	32	1	3	1	1	4	2	1	1	0	0	0	1	1240	200	2	0	0	0
100501	18298	18210	3	24	neg	neg	36.8	0	0	0	0	0	1	1	32	1	3	1	1	4	2	1	1	0	0	0	1	1240	200	2	0	0	0
100501	18324	18210	4	24	neg	neg	36.5	0	0	0	0	0	1	1	32	1	3	1	1	4	2	1	1	0	0	0	1	1240	200	2	0	0	0
100501	18358	18210	5	24	neg	neg	36.7	0	0	0	0	0	1	1	32	1	3	1	1	4	2	1	1	0	0	0	1	1240	200	2	0	0	0
100501	18388	18210	6	24	neg	neg	36.9	0	0	0	0	0	1	1	32	1	3	1	1	4	2	1	1	0	0	0	1	1240	200	2	0	0	0
100501	18418	18210	7	24	neg	neg	36.8	0	0	0	0	0	1	1	32	1	3	1	1	4	2	1	1	0	0	0	1	1240	200	2	0	0	0
100501	18448	18210	8	24	v	v	36.7	0	0	72	8	0	1	1	32	1	3	1	1	4	2	1	1	1	1	0	1	1240	200	2	0	0	0
100501	18478	18210	9	24	neg	neg	37	0	0	0	0	0	1	1	32	1	3	1	1	4	2	1	1	0	0	0	1	1240	200	2	0	0	0
100501	18508	18210	10	24	neg	neg	36.5	0	0	0	0	0	1	1	32	1	3	1	1	4	2	1	1	0	0	0	1	1240	200	2	0	0	0
100501	18538	18210	11	24	neg	v	36.8	0	0	0	0	0	1	1	32	1	3	1	1	4	2	1	1	0	1	0	1	1240	200	2	0	0	0
100501	18568	18210	12	24	neg	neg	37	0	0	0	0	0	1	1	32	1	3	1	1	4	2	1	1	0	0	0	1	1240	200	2	0	0	0
100501	18598	18210	13	24	v	v	37	0	0	120	0	0	1	1	32	1	3	1	1	4	2	1	1	1	1	0	1	1240	200	2	0	0	0
100501	18628	18210	14	24	neg	neg	37	0	0	0	0	0	1	1	32	1	3	1	1	4	2	1	1	0	0	0	1	1240	200	2	0	0	0
100501	18658	18210	15	24	neg	neg	36.6	0	0	0	0	0	1	1	32	1	3	1	1	4	2	1	1	0	0	0	1	1240	200	2	0	0	0
100501	18688	18210	16	24	neg	neg	36.6	0	0	0	0	0	1	1	32	1	3	1	1	4	2	1	1	0	0	0	1	1240	200	2	0	0	0
100501	18718	18210	17	24	neg	neg	36.6	0	0	0	0	0	1	1	32	1	3	1	1	4	2	1	1	0	0	0	1	1240	200	2	0	0	0
100501	18748	18210	18	24	neg	v	37	0	0	0	0	0	1	1	32	1	3	1	1	4	2	1	1	0	1	0	1	1240	200	2	0	0	0
100501	18778	18210	19	24	neg	neg	36.7	0	0	0	0	0	1	1	32	1	3	1	1	4	2	1	1	0	0	0	1	1240	200	2	0	0	0
100501	18808	18210	20	24	neg	neg	37	0	0	0	0	0	1	1	32	1	3	1	1	4	2	1	1	0	0	0	1	1240	200	2	0	0	0
100501	18838	18210	21	24	neg	neg	37	0	0	0	0	0	1	1	32	1	3	1	1	4	2	1	1	0	0	0	1	1240	200	2	0	0	0
100501	18868	18210	22	24	neg	neg	36.5	0	0	0	0	0	1	1	32	1	3	1	1	4	2	1	1	0	0	0	1	1240	200	2	0	0	0
100501	18898	18210	23	24	neg	neg	36.5	0	0	0	0	0	1	1	32	1	3	1	1	4	2	1	1	0	0	0	1	1240	200	2	0	0	0
100501	18928	18210	24	24	neg	neg	36.6	0	0	0	0	0	1	1	32	1	3	1	1	4	2	1	1	0	0	0	1	1240	200	2	0	0	0
100503	18256	18228	1	24	neg	neg	36.7	0	0	0	0		1	1	14	1	7	4	1	2	3	1	1	0	0	0	1	3440	120	2	0	0	0
100503	18286	18228	2	24	neg	v	36.6	400	0	0	0	0	1	1	14	1	7	4	1	2	3	1	1	0	1	0	1	3440	120	2	0	0	0
100503	18316	18228	3	24	neg	neg	37	0	0	0	0	0	1	1	14	1	7	4	1	2	3	1	1	0	0	0	1	3440	120	2	0	0	0
100503	18346	18228	4	24	neg	neg	36.9	0	0	0	0	0	1	1	14	1	7	4	1	2	3	1	1	0	0	0	1	3440	120	2	0	0	0
100503	18376	18228	5	24	neg	neg	36.7	0	0	0	0	0	1	1	14	1	7	4	1	2	3	1	1	0	0	0	1	3440	120	2	0	0	0
100503	18406	18228	6	24	neg	neg	36.5	0	0	0	0	0	1	1	14	1	7	4	1	2	3	1	1	0	0	0	1	3440	120	2	0	0	0
100503	18436	18228	7	24	f	f	37.9	5560	0	0	0	0	1	1	14	1	7	4	1	2	3	1	1	0	0	0	1	3440	120	2	0	0	1
100503	18466	18228	8	24	neg	neg	37.3	0	0	0	0	0	1	1	14	1	7	4	1	2	3	1	1	0	0	0	1	3440	120	2	0	0	0
100503	18496	18228	9	24	neg	neg	37	0	0	0	0	0	1	1	14	1	7	4	1	2	3	1	1	0	0	0	1	3440	120	2	0	0	0
100503	18526	18228	10	24	neg	v	37	0	0	0	0	0	1	1	14	1	7	4	1	2	3	1	1	0	1	0	1	3440	120	2	0	0	0
100503	18556	18228	11	24	neg	neg	37.1	0	0	0	0	1	1	1	14	1	7	4	1	2	3	1	1	0	0	0	1	3440	120	2	0	0	0
100503	18586	18228	12	24	neg	v	36.8	0	0	0	0	0	1	1	14	1	7	4	1	2	3	1	1	0	1	0	1	3440	120	2	0	0	0
100503	18616	18228	13	24	neg	neg	36.8	0	0	0	0	0	1	1	14	1	7	4	1	2	3	1	1	0	0	0	1	3440	120	2	0	0	0
100503	18646	18228	14	24	v	v	36.9	0	0	240	0	0	1	1	14	1	7	4	1	2	3	1	1	1	1	0	1	3440	120	2	0	0	0
100503	18676	18228	15	24	neg	neg	36.8	0	0	0	0	0	1	1	14	1	7	4	1	2	3	1	1	0	0	0	1	3440	120	2	0	0	0
100503	18706	18228	16	24	neg	v	36.6	0	0	0	0	0	1	1	14	1	7	4	1	2	3	1	1	0	1	0	1	3440	120	2	0	0	0
100503	18736	18228	17	24	neg	v	36.8	0	0	0	0	0	1	1	14	1	7	4	1	2	3	1	1	0	1	0	1	3440	120	2	0	0	0
100503	18766	18228	18	24	neg	f	36.7	0	0	0	0	0	1	1	14	1	7	4	1	2	3	1	1	0	0	0	1	3440	120	2	0	0	0
100503	18796	18228	19	24	neg	neg	36.5	0	0	0	0	0	1	1	14	1	7	4	1	2	3	1	1	0	0	0	1	3440	120	2	0	0	0
100503	18826	18228	20	24	neg	neg	36.8	0	0	0	0	0	1	1	14	1	7	4	1	2	3	1	1	0	0	0	1	3440	120	2	0	0	0
100503	18856	18228	21	24	neg	neg	39.9	0	0	0	0	0	1	1	14	1	7	4	1	2	3	1	1	0	0	0	1	3440	120	2	0	0	0
100503	18886	18228	22	24	neg	neg	36.6	0	0	0	0	0	1	1	14	1	7	4	1	2	3	1	1	0	0	0	1	3440	120	2	0	0	0
100503	18916	18228	23	24	neg	neg	37	0	0	0	0	0	1	1	14	1	7	4	1	2	3	1	1	0	0	0	1	3440	120	2	0	0	0
100503	18946	18228	24	24	neg	neg	37	0	0	0	0	0	1	1	14	1	7	4	1	2	3	1	1	0	0	0	1	3440	120	2	0	0	0
100601	18067	18039	1	24	neg	neg	37	0	0	0	0		1	1	60	1	1	1	1	4	2	1	2	0	0	0	1	6400	480	3	0	0	0
100601	18097	18039	2	24	neg	neg	36.5	0	0	0	0	0	1	1	60	1	1	1	1	4	2	1	2	0	0	0	1	6400	480	3	0	0	0
100601	18127	18039	3	24	neg	neg	36.8	0	0	0	0	0	1	1	60	1	1	1	1	4	2	1	2	0	0	0	1	6400	480	3	0	0	0
100601	18157	18039	4	24	neg	neg	36.5	0	0	0	0	0	1	1	60	1	1	1	1	4	2	1	2	0	0	0	1	6400	480	3	0	0	0
100601	18187	18039	5	24	neg	neg	36.5	0	0	0	0	0	1	1	60	1	1	1	1	4	2	1	2	0	0	0	1	6400	480	3	0	0	0
100601	18217	18039	6	24	neg	neg	36.5	0	0	0	0	0	1	1	60	1	1	1	1	4	2	1	2	0	0	0	1	6400	480	3	0	0	0
100601	18247	18039	7	24	neg	neg	36.9	0	0	0	0	0	1	1	60	1	1	1	1	4	2	1	2	0	0	0	1	6400	480	3	0	0	0
100601	18277	18039	8	24	neg	neg	36.7	0	0	0	0	0	1	1	60	1	1	1	1	4	2	1	2	0	0	0	1	6400	480	3	0	0	0
100601	18307	18039	9	24	neg	neg	36.6	0	0	0	0	0	1	1	60	1	1	1	1	4	2	1	2	0	0	0	1	6400	480	3	0	0	0
100601	18333	18039	10	24	neg	neg	38.3	0	0	0	0	1	1	1	60	1	1	1	1	4	2	1	2	0	0	0	1	6400	480	3	0	0	0
100601	18367	18039	11	24	neg	neg	36.6	0	0	0	0	0	1	1	60	1	1	1	1	4	2	1	2	0	0	0	1	6400	480	3	0	0	0
100601	18397	18039	12	24	neg	neg	36.6	0	0	0	0	0	1	1	60	1	1	1	1	4	2	1	2	0	0	0	1	6400	480	3	0	0	0
100601	18427	18039	13	24	neg	neg	36.8	0	0	0	0	0	1	1	60	1	1	1	1	4	2	1	2	0	0	0	1	6400	480	3	0	0	0
100601	18464	18039	14	24	v	v	39.4	0	0	1080	8	1	1	1	60	1	1	1	1	4	2	1	2	1	1	1	1	6400	480	3	0	0	0
100601	18487	18039	15	24	neg	neg	37.1	0	0	0	0	0	1	1	60	1	1	1	1	4	2	1	2	0	0	0	1	6400	480	3	0	0	0
100601	18493	18039	16	24	fv	fv	36.5	583	0	10644	23	1	1	1	60	1	1	1	1	4	2	1	2	1	1	0	1	6400	480	3	0	0	0
100601	18547	18039	17	24	neg	neg	36.6	0	0	0	0	0	1	1	60	1	1	1	1	4	2	1	2	0	0	0	1	6400	480	3	0	0	0
100601	18577	18039	18	24	neg	neg	36.7	0	0	0	0	0	1	1	60	1	1	1	1	4	2	1	2	0	0	0	1	6400	480	3	0	0	0
100601	18607	18039	19	24	neg	neg	37.2	0	0	0	0	0	1	1	60	1	1	1	1	4	2	1	2	0	0	0	1	6400	480	3	0	0	0
100601	18637	18039	20	24	neg	neg	36.8	0	0	0	0	1	1	1	60	1	1	1	1	4	2	1	2	0	0	0	1	6400	480	3	0	0	0
100601	18667	18039	21	24	neg	neg	36.6	0	0	0	0	0	1	1	60	1	1	1	1	4	2	1	2	0	0	0	1	6400	480	3	0	0	0
100601	18697	18039	22	24	neg	neg	36.7	0	0	0	0	0	1	1	60	1	1	1	1	4	2	1	2	0	0	0	1	6400	480	3	0	0	0
100601	18727	18039	23	24	neg	neg	36.6	0	0	0	0	0	1	1	60	1	1	1	1	4	2	1	2	0	0	0	1	6400	480	3	0	0	0
100601	18757	18039	24	24	neg	neg	36.7	0	0	0	0	0	1	1	60	1	1	1	1	4	2	1	2	0	0	0	1	6400	480	3	0	0	0
100604	18070	18042	1	24	neg	neg	36.8	0	0	0	0		1	1	16	1	9	4	1	2	3	1	2	0	0	0	1	4000	288	2	0	0	0
100604	18100	18042	2	24	neg	v	36.8	0	0	0	0	0	1	1	16	1	9	4	1	2	3	1	2	0	1	0	1	4000	288	2	0	0	0
100604	18105	18042	3	24	v	v	39.4	0	0	11520	0	1	1	1	16	1	9	4	1	2	3	1	2	1	1	1	1	4000	288	2	0	0	0
100604	18160	18042	4	24	neg	neg	36.6	0	0	0	0	0	1	1	16	1	9	4	1	2	3	1	2	0	0	0	1	4000	288	2	0	0	0
100604	18190	18042	5	24	neg	neg	36.7	0	0	0	0	0	1	1	16	1	9	4	1	2	3	1	2	0	0	0	1	4000	288	2	0	0	0
100604	18220	18042	6	24	neg	neg	37.1	0	0	0	0	0	1	1	16	1	9	4	1	2	3	1	2	0	0	0	1	4000	288	2	0	0	0
100604	18250	18042	7	24	neg	v	37.1	0	0	0	0	0	1	1	16	1	9	4	1	2	3	1	2	0	1	0	1	4000	288	2	0	0	0
100604	18280	18042	8	24	v	v	37	0	0	240	40	0	1	1	16	1	9	4	1	2	3	1	2	1	1	0	1	4000	288	2	0	0	0
100604	18310	18042	9	24	neg	neg	37.5	0	0	0	0	0	1	1	16	1	9	4	1	2	3	1	2	0	0	0	1	4000	288	2	0	0	0
100604	18339	18042	10	24	neg	neg	36.6	0	0	0	0	0	1	1	16	1	9	4	1	2	3	1	2	0	0	0	1	4000	288	2	0	0	0
100604	18370	18042	11	24	neg	v	37	0	0	0	0	0	1	1	16	1	9	4	1	2	3	1	2	0	1	0	1	4000	288	2	0	0	0
100604	18400	18042	12	24	neg	neg	36.7	0	0	0	0	0	1	1	16	1	9	4	1	2	3	1	2	0	0	0	1	4000	288	2	0	0	0
100604	18430	18042	13	24	neg	v	36.8	0	0	0	0	0	1	1	16	1	9	4	1	2	3	1	2	0	1	0	1	4000	288	2	0	0	0
100604	18460	18042	14	24	neg	f	37.1	0	0	0	0	0	1	1	16	1	9	4	1	2	3	1	2	0	0	0	1	4000	288	2	0	0	0
100604	18490	18042	15	24	neg	neg	36.5	0	0	0	0	0	1	1	16	1	9	4	1	2	3	1	2	0	0	0	1	4000	288	2	0	0	0
100604	18520	18042	16	24	neg	v	37	0	0	0	0	0	1	1	16	1	9	4	1	2	3	1	2	0	1	0	1	4000	288	2	0	0	0
100604	18550	18042	17	24	neg	v	37	0	0	0	0	0	1	1	16	1	9	4	1	2	3	1	2	0	1	0	1	4000	288	2	0	0	0
100604	18580	18042	18	24	neg	v	36.8	840	0	0	0	0	1	1	16	1	9	4	1	2	3	1	2	0	1	0	1	4000	288	2	0	0	0
100604	18610	18042	19	24	neg	neg	37	0	0	0	0	0	1	1	16	1	9	4	1	2	3	1	2	0	0	0	1	4000	288	2	0	0	0
100604	18640	18042	20	24	neg	neg	36.7	0	0	0	0	0	1	1	16	1	9	4	1	2	3	1	2	0	0	0	1	4000	288	2	0	0	0
100604	18670	18042	21	24	neg	neg	36.7	0	0	0	0	0	1	1	16	1	9	4	1	2	3	1	2	0	0	0	1	4000	288	2	0	0	0
100604	18700	18042	22	24	neg	v	36.6	0	0	0	0	0	1	1	16	1	9	4	1	2	3	1	2	0	1	0	1	4000	288	2	0	0	0
100604	18730	18042	23	24	neg	v	36.6	0	0	0	0	0	1	1	16	1	9	4	1	2	3	1	2	0	1	0	1	4000	288	2	0	0	0
100604	18760	18042	24	24	neg	f	36.6	0	0	0	0	0	1	1	16	1	9	4	1	2	3	1	2	0	0	0	1	4000	288	2	0	0	0
100605	18222	18195	1	24	neg	neg	36.5	0	0	0	0		1	2	14	1	9	4	1	2	3	1	1	0	0	0	1	4000	1600	2	0	0	0
100605	18253	18195	2	24	neg	neg	36.5	0	0	0	0	0	1	2	14	1	9	4	1	2	3	1	1	0	0	0	1	4000	1600	2	0	0	0
100605	18283	18195	3	24	neg	neg	36.7	0	0	0	0	0	1	2	14	1	9	4	1	2	3	1	1	0	0	0	1	4000	1600	2	0	0	0
100605	18321	18195	4	24	v	v	37.5	0	0	18000	800	1	1	2	14	1	9	4	1	2	3	1	1	1	1	1	1	4000	1600	2	0	0	0
100605	18343	18195	5	24	neg	neg	37	0	0	0	0	0	1	2	14	1	9	4	1	2	3	1	1	0	0	0	1	4000	1600	2	0	0	0
100605	18373	18195	6	24	neg	neg	36.9	0	0	0	0	0	1	2	14	1	9	4	1	2	3	1	1	0	0	0	1	4000	1600	2	0	0	0
100605	18377	18195	7	24	f	f	36.6	0	0	0	0	1	1	2	14	1	9	4	1	2	3	1	1	0	0	0	1	4000	1600	2	0	0	1
100605	18433	18195	8	24	v	v	37.3	0	0	440	0	0	1	2	14	1	9	4	1	2	3	1	1	1	1	0	1	4000	1600	2	1	1	0
100605	18463	18195	9	24	neg	neg	36.7	0	0	0	0	0	1	2	14	1	9	4	1	2	3	1	1	0	0	0	1	4000	1600	2	0	0	0
100605	18493	18195	10	24	neg	neg	36.5	0	0	0	0	0	1	2	14	1	9	4	1	2	3	1	1	0	0	0	1	4000	1600	2	0	0	0
100605	18523	18195	11	24	v	v	36.6	0	0	90	155	0	1	2	14	1	9	4	1	2	3	1	1	1	1	0	1	4000	1600	2	0	0	0
100605	18553	18195	12	24	neg	neg	36.8	0	0	0	0	0	1	2	14	1	9	4	1	2	3	1	1	0	0	0	1	4000	1600	2	0	0	0
100605	18583	18195	13	24	neg	neg	36.6	0	0	0	0	0	1	2	14	1	9	4	1	2	3	1	1	0	0	0	1	4000	1600	2	0	0	0
100605	18613	18195	14	24	neg	neg	36.6	0	0	0	0	0	1	2	14	1	9	4	1	2	3	1	1	0	0	0	1	4000	1600	2	0	0	0
100605	18643	18195	15	24	neg	neg	36.7	0	0	0	0	0	1	2	14	1	9	4	1	2	3	1	1	0	0	0	1	4000	1600	2	0	0	0
100605	18673	18195	16	24	neg	neg	36.6	0	0	0	0	0	1	2	14	1	9	4	1	2	3	1	1	0	0	0	1	4000	1600	2	0	0	0
100605	18703	18195	17	24	neg	neg	36.7	0	0	0	0	0	1	2	14	1	9	4	1	2	3	1	1	0	0	0	1	4000	1600	2	0	0	0
100605	18733	18195	18	24	neg	v	36.6	0	0	0	0	0	1	2	14	1	9	4	1	2	3	1	1	0	1	0	1	4000	1600	2	0	0	0
100605	18762	18195	19	24	neg	neg	36.6	0	0	0	0	0	1	2	14	1	9	4	1	2	3	1	1	0	0	0	1	4000	1600	2	0	0	0
100605	18793	18195	20	24	neg	v	36.7	0	0	0	0	0	1	2	14	1	9	4	1	2	3	1	1	0	1	0	1	4000	1600	2	0	0	0
100605	18823	18195	21	24	neg	v	36.8	0	0	0	0	0	1	2	14	1	9	4	1	2	3	1	1	0	1	0	1	4000	1600	2	0	0	0
100605	18853	18195	22	24	neg	neg	36.7	0	0	0	0	0	1	2	14	1	9	4	1	2	3	1	1	0	0	0	1	4000	1600	2	0	0	0
100605	18883	18195	23	24	neg	v	36.5	0	0	0	0	0	1	2	14	1	9	4	1	2	3	1	1	0	1	0	1	4000	1600	2	0	0	0
100605	18913	18195	24	24	neg	v	37	0	0	0	0	0	1	2	14	1	9	4	1	2	3	1	1	0	1	0	1	4000	1600	2	0	0	0
100606	18114	18086	1	24	neg	neg	36.8	0	0	0	0		1	1	12	1	3	4	1	2	2	1	2	0	0	0	1	10160	160	3	0	0	0
100606	18144	18086	2	24	neg	neg	36.5	0	0	0	0	0	1	1	12	1	3	4	1	2	2	1	2	0	0	0	1	10160	160	3	0	0	0
100606	18174	18086	3	24	neg	neg	36.6	0	0	0	0	0	1	1	12	1	3	4	1	2	2	1	2	0	0	0	1	10160	160	3	0	0	0
100606	18204	18086	4	24	neg	neg	36.8	0	0	0	0	0	1	1	12	1	3	4	1	2	2	1	2	0	0	0	1	10160	160	3	0	0	0
100606	18228	18086	5	24	v	v	39.6	0	0	5120	0	0	1	1	12	1	3	4	1	2	2	1	2	1	1	1	1	10160	160	3	0	0	0
100606	18274	18086	6	24	f	f	39.8	16880	0	0	0	0	1	1	12	1	3	4	1	2	2	1	2	0	0	0	1	10160	160	3	0	0	1
100606	18294	18086	7	24	neg	neg	36.6	0	0	0	0	0	1	1	12	1	3	4	1	2	2	1	2	0	0	0	1	10160	160	3	0	0	0
100606	18324	18086	8	24	neg	neg	37	0	0	0	0	0	1	1	12	1	3	4	1	2	2	1	2	0	0	0	1	10160	160	3	0	0	0
100606	18354	18086	9	24	v	v	37.1	0	0	480	80	0	1	1	12	1	3	4	1	2	2	1	2	1	1	0	1	10160	160	3	0	0	0
100606	18384	18086	10	24	neg	neg	36.8	0	0	0	0	0	1	1	12	1	3	4	1	2	2	1	2	0	0	0	1	10160	160	3	0	0	0
100606	18414	18086	11	24	v	v	36.5	0	0	8	8	0	1	1	12	1	3	4	1	2	2	1	2	1	1	0	1	10160	160	3	0	0	0
100606	18444	18086	12	24	neg	neg	36.6	0	0	0	0	0	1	1	12	1	3	4	1	2	2	1	2	0	0	0	1	10160	160	3	0	0	0
100606	18474	18086	13	24	neg	neg	37.5	0	0	0	0	0	1	1	12	1	3	4	1	2	2	1	2	0	0	0	1	10160	160	3	0	0	0
100606	18504	18086	14	24	v	v	37.2	0	0	309	80	0	1	1	12	1	3	4	1	2	2	1	2	1	1	0	1	10160	160	3	0	0	0
100606	18534	18086	15	24	neg	neg	36.7	0	0	0	0	0	1	1	12	1	3	4	1	2	2	1	2	0	0	0	1	10160	160	3	0	0	0
100606	18564	18086	16	24	neg	neg	37	0	0	0	0	0	1	1	12	1	3	4	1	2	2	1	2	0	0	0	1	10160	160	3	0	0	0
100606	18594	18086	17	24	neg	neg	37.2	0	0	0	0	0	1	1	12	1	3	4	1	2	2	1	2	0	0	0	1	10160	160	3	0	0	0
100606	18624	18086	18	24	neg	neg	36.8	0	0	0	0	0	1	1	12	1	3	4	1	2	2	1	2	0	0	0	1	10160	160	3	0	0	0
100606	18654	18086	19	24	neg	v	36.7	0	0	0	0	0	1	1	12	1	3	4	1	2	2	1	2	0	1	0	1	10160	160	3	0	0	0
100606	18684	18086	20	24	neg	neg	36.6	0	0	0	0	0	1	1	12	1	3	4	1	2	2	1	2	0	0	0	1	10160	160	3	0	0	0
100606	18714	18086	21	24	neg	neg	36.6	0	0	0	0	0	1	1	12	1	3	4	1	2	2	1	2	0	0	0	1	10160	160	3	0	0	0
100606	18744	18086	22	24	neg	neg	36.7	0	0	0	0	0	1	1	12	1	3	4	1	2	2	1	2	0	0	0	1	10160	160	3	0	0	0
100606	18756	18086	23	24	f	f	37.8	14720	0	0	0	1	1	1	12	1	3	4	1	2	2	1	2	0	0	0	1	10160	160	3	0	0	1
100606	18804	18086	24	24	neg	neg	37.1	0	0	0	0	0	1	1	12	1	3	4	1	2	2	1	2	0	0	0	1	10160	160	3	0	0	0
100608	18080	18052	1	24	neg	neg	36.8	0	0	0	0		1	2	8	1	0	4	1	1	1	1	2	0	0	0	1	11600	960	3	0	0	0
100608	18110	18052	2	24	neg	neg	36.8	0	0	0	0	0	1	2	8	1	0	4	1	1	1	1	2	0	0	0	1	11600	960	3	0	0	0
100608	18140	18052	3	24	neg	neg	37.5	0	0	0	0	0	1	2	8	1	0	4	1	1	1	1	2	0	0	0	1	11600	960	3	0	0	0
100608	18170	18052	4	24	neg	neg	36.5	0	0	0	0	0	1	2	8	1	0	4	1	1	1	1	2	0	0	0	1	11600	960	3	0	0	0
100608	18192	18052	5	24	v	v	40	0	0	21536	440	1	1	2	8	1	0	4	1	1	1	1	2	1	1	1	1	11600	960	3	0	0	0
100608	18230	18052	6	24	neg	neg	37.3	0	0	0	0	0	1	2	8	1	0	4	1	1	1	1	2	0	0	0	1	11600	960	3	0	0	0
100608	18260	18052	7	24	neg	neg	37.2	0	0	0	0	0	1	2	8	1	0	4	1	1	1	1	2	0	0	0	1	11600	960	3	0	0	0
100608	18281	18052	8	24	v	v	37.4	0	0	14960	0	0	1	2	8	1	0	4	1	1	1	1	2	1	1	0	1	11600	960	3	0	0	0
100608	18320	18052	9	24	v	v	36.8	0	0	4000	0	0	1	2	8	1	0	4	1	1	1	1	2	1	1	0	1	11600	960	3	0	1	0
100608	18350	18052	10	24	neg	neg	37	0	0	0	0	0	1	2	8	1	0	4	1	1	1	1	2	0	0	0	1	11600	960	3	0	0	0
100608	18380	18052	11	24	neg	neg	36.9	0	0	0	0	0	1	2	8	1	0	4	1	1	1	1	2	0	0	0	1	11600	960	3	0	0	0
100608	18410	18052	12	24	neg	neg	37.3	0	0	0	0	0	1	2	8	1	0	4	1	1	1	1	2	0	0	0	1	11600	960	3	0	0	0
100608	18432	18052	13	24	v	v	38.4	0	0	3720	240	1	1	2	8	1	0	4	1	1	1	1	2	1	1	1	1	11600	960	3	0	0	0
100608	18470	18052	14	24	neg	neg	37.2	0	0	0	0	0	1	2	8	1	0	4	1	1	1	1	2	0	0	0	1	11600	960	3	0	0	0
100608	18500	18052	15	24	neg	neg	37	0	0	0	0	0	1	2	8	1	0	4	1	1	1	1	2	0	0	0	1	11600	960	3	0	0	0
100608	18506	18052	16	24	neg	v	39.4	31805	0	0	0	1	1	2	8	1	0	4	1	1	1	1	2	0	1	0	1	11600	960	3	0	0	0
100608	18560	18052	17	24	neg	neg	37	0	0	0	0	0	1	2	8	1	0	4	1	1	1	1	2	0	0	0	1	11600	960	3	0	0	0
100608	18590	18052	18	24	neg	neg	37	0	0	0	0	0	1	2	8	1	0	4	1	1	1	1	2	0	0	0	1	11600	960	3	0	0	0
100608	18620	18052	19	24	neg	v	36.9	0	0	0	0	0	1	2	8	1	0	4	1	1	1	1	2	0	1	0	1	11600	960	3	0	0	0
100608	18650	18052	20	24	v	v	36.9	0	0	400	0	0	1	2	8	1	0	4	1	1	1	1	2	1	1	0	1	11600	960	3	0	0	0
100608	18680	18052	21	24	neg	v	36.6	0	0	0	0	0	1	2	8	1	0	4	1	1	1	1	2	0	1	0	1	11600	960	3	0	1	0
100608	18710	18052	22	24	neg	neg	36.7	0	0	0	0	0	1	2	8	1	0	4	1	1	1	1	2	0	0	0	1	11600	960	3	0	0	0
100608	18740	18052	23	24	neg	neg	36.7	0	0	0	0	0	1	2	8	1	0	4	1	1	1	1	2	0	0	0	1	11600	960	3	0	0	0
100608	18770	18052	24	24	neg	neg	36.9	0	0	0	0	1	1	2	8	1	0	4	1	1	1	1	2	0	0	0	1	11600	960	3	0	0	0
100803	18220	18192	1	24	neg	neg	38	0	0	0	0		1	2	4	1	0	0	1	1	1	1	1	0	0	0	1	28604	173	3	0	0	0
100803	18250	18192	2	24	neg	neg	36.6	0	0	0	0	0	1	2	4	1	0	0	1	1	1	1	1	0	0	0	1	28604	173	3	0	0	0
100803	18280	18192	3	24	neg	neg	36.6	0	0	0	0	0	1	2	4	1	0	0	1	1	1	1	1	0	0	0	1	28604	173	3	0	0	0
100803	18310	18192	4	24	neg	neg	37	0	0	0	0	0	1	2	4	1	0	0	1	1	1	1	1	0	0	0	1	28604	173	3	0	0	0
100803	18340	18192	5	24	neg	neg	37	0	0	0	0	0	1	2	4	1	0	0	1	1	1	1	1	0	0	0	1	28604	173	3	0	0	0
100803	18370	18192	6	24	neg	neg	37	0	0	0	0	0	1	2	4	1	0	0	1	1	1	1	1	0	0	0	1	28604	173	3	0	0	0
100803	18400	18192	7	24	neg	neg	36.6	0	0	0	0	0	1	2	4	1	0	0	1	1	1	1	1	0	0	0	1	28604	173	3	0	0	0
100803	18430	18192	8	24	neg	neg	37.1	0	0	0	0	0	1	2	4	1	0	0	1	1	1	1	1	0	0	0	1	28604	173	3	0	0	0
100803	18460	18192	9	24	neg	neg	36.7	0	0	0	0	0	1	2	4	1	0	0	1	1	1	1	1	0	0	0	1	28604	173	3	0	0	0
100803	18490	18192	10	24	neg	neg	37.3	0	0	0	0	0	1	2	4	1	0	0	1	1	1	1	1	0	0	0	1	28604	173	3	0	0	0
100803	18520	18192	11	24	neg	neg	36.5	0	0	0	0	0	1	2	4	1	0	0	1	1	1	1	1	0	0	0	1	28604	173	3	0	0	0
100803	18550	18192	12	24	neg	neg	36.8	0	0	0	0	0	1	2	4	1	0	0	1	1	1	1	1	0	0	0	1	28604	173	3	0	0	0
100803	18580	18192	13	24	neg	neg	36.5	0	0	0	0	0	1	2	4	1	0	0	1	1	1	1	1	0	0	0	1	28604	173	3	0	0	0
100803	18610	18192	14	24	neg	neg	36.9	0	0	0	0	0	1	2	4	1	0	0	1	1	1	1	1	0	0	0	1	28604	173	3	0	0	0
100803	18640	18192	15	24	neg	neg	36.9	0	0	0	0	0	1	2	4	1	0	0	1	1	1	1	1	0	0	0	1	28604	173	3	0	0	0
100803	18670	18192	16	24	neg	neg	36.8	0	0	0	0	0	1	2	4	1	0	0	1	1	1	1	1	0	0	0	1	28604	173	3	0	0	0
100803	18700	18192	17	24	neg	neg	36.5	0	0	0	0	0	1	2	4	1	0	0	1	1	1	1	1	0	0	0	1	28604	173	3	0	0	0
100803	18730	18192	18	24	neg	neg	36.5	0	0	0	0	0	1	2	4	1	0	0	1	1	1	1	1	0	0	0	1	28604	173	3	0	0	0
100803	18760	18192	19	24	neg	neg	36.7	0	0	0	0	0	1	2	4	1	0	0	1	1	1	1	1	0	0	0	1	28604	173	3	0	0	0
100803	18790	18192	20	24	neg	neg	36.9	0	0	0	0	0	1	2	4	1	0	0	1	1	1	1	1	0	0	0	1	28604	173	3	0	0	0
100803	18820	18192	21	24	neg	neg	36.8	0	0	0	0	0	1	2	4	1	0	0	1	1	1	1	1	0	0	0	1	28604	173	3	0	0	0
100803	18850	18192	22	24	neg	neg	37.1	0	0	0	0	0	1	2	4	1	0	0	1	1	1	1	1	0	0	0	1	28604	173	3	0	0	0
100803	18871	18192	23	24	neg	neg	36.5	0	0	0	0	0	1	2	4	1	0	0	1	1	1	1	1	0	0	0	1	28604	173	3	0	0	0
100803	18910	18192	24	24	neg	neg	36.5	0	0	0	0	0	1	2	4	1	0	0	1	1	1	1	1	0	0	0	1	28604	173	3	0	0	0
100804	18220	18192	1	24	neg	neg	37.3	0	0	0	0		1	1	3	1	0	0	1	1	1	1	1	0	0	0	1	43604	351	3	0	0	0
100804	18250	18192	2	24	neg	neg	36.6	0	0	0	0	0	1	1	3	1	0	0	1	1	1	1	1	0	0	0	1	43604	351	3	0	0	0
100804	18275	18192	3	24	v	v	40	0	0	57142	3428	0	1	1	3	1	0	0	1	1	1	1	1	1	1	1	1	43604	351	3	0	0	0
100804	18310	18192	4	24	neg	neg	37	0	0	0	0	0	1	1	3	1	0	0	1	1	1	1	1	0	0	0	1	43604	351	3	0	0	0
100804	18340	18192	5	24	neg	neg	36.7	0	0	0	0	0	1	1	3	1	0	0	1	1	1	1	1	0	0	0	1	43604	351	3	0	0	0
100804	18370	18192	6	24	neg	neg	37.5	0	0	0	0	0	1	1	3	1	0	0	1	1	1	1	1	0	0	0	1	43604	351	3	0	0	0
100804	18400	18192	7	24	neg	neg	36.5	0	0	0	0	0	1	1	3	1	0	0	1	1	1	1	1	0	0	0	1	43604	351	3	0	0	0
100804	18430	18192	8	24	neg	neg	36.8	0	0	0	0	0	1	1	3	1	0	0	1	1	1	1	1	0	0	0	1	43604	351	3	0	0	0
100804	18452	18192	9	24	neg	neg	38.6	0	0	0	0	1	1	1	3	1	0	0	1	1	1	1	1	0	0	0	1	43604	351	3	0	0	0
100804	18490	18192	10	24	neg	neg	37.4	0	0	0	0	0	1	1	3	1	0	0	1	1	1	1	1	0	0	0	1	43604	351	3	0	0	0
100804	18520	18192	11	24	neg	neg	36.5	0	0	0	0	0	1	1	3	1	0	0	1	1	1	1	1	0	0	0	1	43604	351	3	0	0	0
100804	18523	18192	12	24	v	v	40.6	0	0	13480	920	1	1	1	3	1	0	0	1	1	1	1	1	1	1	1	1	43604	351	3	0	0	0
100804	18573	18192	13	24	f	f	41	3480	0	0	0	1	1	1	3	1	0	0	1	1	1	1	1	0	0	0	1	43604	351	3	0	0	1
100804	18610	18192	14	24	neg	neg	37.2	0	0	0	0	0	1	1	3	1	0	0	1	1	1	1	1	0	0	0	1	43604	351	3	0	0	0
100804	18640	18192	15	24	neg	neg	37.2	0	0	0	0	0	1	1	3	1	0	0	1	1	1	1	1	0	0	0	1	43604	351	3	0	0	0
100804	18670	18192	16	24	neg	neg	37.2	0	0	0	0	0	1	1	3	1	0	0	1	1	1	1	1	0	0	0	1	43604	351	3	0	0	0
100804	18700	18192	17	24	neg	neg	36.6	0	0	0	0	0	1	1	3	1	0	0	1	1	1	1	1	0	0	0	1	43604	351	3	0	0	0
100804	18730	18192	18	24	neg	v	36.6	0	0	0	0	0	1	1	3	1	0	0	1	1	1	1	1	0	1	0	1	43604	351	3	0	0	0
100804	18760	18192	19	24	neg	neg	36.7	0	0	0	0	0	1	1	3	1	0	0	1	1	1	1	1	0	0	0	1	43604	351	3	0	0	0
100804	18790	18192	20	24	neg	neg	36.8	0	0	0	0	0	1	1	3	1	0	0	1	1	1	1	1	0	0	0	1	43604	351	3	0	0	0
100804	18820	18192	21	24	neg	neg	37.2	0	0	0	0	0	1	1	3	1	0	0	1	1	1	1	1	0	0	0	1	43604	351	3	0	0	0
100804	18850	18192	22	24	neg	neg	36.5	0	0	0	0	0	1	1	3	1	0	0	1	1	1	1	1	0	0	0	1	43604	351	3	0	0	0
100804	18880	18192	23	24	neg	neg	36.8	0	0	0	0	0	1	1	3	1	0	0	1	1	1	1	1	0	0	0	1	43604	351	3	0	0	0
100804	18910	18192	24	24	neg	neg	36.8	0	0	0	0	0	1	1	3	1	0	0	1	1	1	1	1	0	0	0	1	43604	351	3	0	0	0
101006	18382	18354	1	21	neg	neg	36.7	0	0	0	0		1	2	6	1	0	0	1	1	1	1	2	0	0	0	2	1160	280	2	0	0	0
101006	18412	18354	2	21	neg	neg	37.3	0	0	0	0	0	1	2	6	1	0	0	1	1	1	1	2	0	0	0	2	1160	280	2	0	0	0
101006	18442	18354	3	21	neg	neg	37.3	0	0	0	0	0	1	2	6	1	0	0	1	1	1	1	2	0	0	0	2	1160	280	2	0	0	0
101006	18472	18354	4	21	neg	neg	37.3	0	0	0	0	0	1	2	6	1	0	0	1	1	1	1	2	0	0	0	2	1160	280	2	0	0	0
101006	18502	18354	5	21	neg	neg	37.6	0	0	0	0	0	1	2	6	1	0	0	1	1	1	1	2	0	0	0	2	1160	280	2	0	0	0
101006	18532	18354	6	21	neg	neg	36.9	0	0	0	0	0	1	2	6	1	0	0	1	1	1	1	2	0	0	0	2	1160	280	2	0	0	0
101006	18562	18354	7	21	neg	neg	37	0	0	0	0	0	1	2	6	1	0	0	1	1	1	1	2	0	0	0	2	1160	280	2	0	0	0
101006	18592	18354	8	21	neg	neg	36.6	0	0	0	0	0	1	2	6	1	0	0	1	1	1	1	2	0	0	0	2	1160	280	2	0	0	0
101006	18622	18354	9	21	neg	neg	37.1	0	0	0	0	0	1	2	6	1	0	0	1	1	1	1	2	0	0	0	2	1160	280	2	0	0	0
101006	18652	18354	10	21	neg	neg	37.3	0	0	0	0	0	1	2	6	1	0	0	1	1	1	1	2	0	0	0	2	1160	280	2	0	0	0
101006	18682	18354	11	21	neg	neg	36.6	0	0	0	0	0	1	2	6	1	0	0	1	1	1	1	2	0	0	0	2	1160	280	2	0	0	0
101006	18712	18354	12	21	neg	neg	37	0	0	0	0	0	1	2	6	1	0	0	1	1	1	1	2	0	0	0	2	1160	280	2	0	0	0
101006	18742	18354	13	21	neg	neg	36.7	0	0	0	0	0	1	2	6	1	0	0	1	1	1	1	2	0	0	0	2	1160	280	2	0	0	0
101006	18772	18354	14	21	neg	neg	36.7	0	0	0	0	0	1	2	6	1	0	0	1	1	1	1	2	0	0	0	2	1160	280	2	0	0	0
101006	18802	18354	15	21	neg	neg	36.8	0	0	0	0	0	1	2	6	1	0	0	1	1	1	1	2	0	0	0	2	1160	280	2	0	0	0
101006	18832	18354	16	21	neg	neg	37	0	0	0	0	0	1	2	6	1	0	0	1	1	1	1	2	0	0	0	2	1160	280	2	0	0	0
101006	18862	18354	17	21	neg	neg	37	0	0	0	0	0	1	2	6	1	0	0	1	1	1	1	2	0	0	0	2	1160	280	2	0	0	0
101006	18892	18354	18	21	neg	neg	36.5	0	0	0	0	0	1	2	6	1	0	0	1	1	1	1	2	0	0	0	2	1160	280	2	0	0	0
101006	18922	18354	19	21	neg	neg	36.8	0	0	0	0	0	1	2	6	1	0	0	1	1	1	1	2	0	0	0	2	1160	280	2	0	0	0
101006	18952	18354	20	21	neg	neg	36.8	0	0	0	0	0	1	2	6	1	0	0	1	1	1	1	2	0	0	0	2	1160	280	2	0	0	0
101006	18982	18354	21	21	neg	neg	37	0	0	0	0	0	1	2	6	1	0	0	1	1	1	1	2	0	0	0	2	1160	280	2	0	0	0
101202	18162	18134	1	24	neg	neg	36.5	0	0	0	0		1	1	13	1	7	4	1	2	3	1	1	0	0	0	1	176	0	1	0	0	0
101202	18192	18134	2	24	neg	neg	36.7	0	0	0	0	0	1	1	13	1	7	4	1	2	3	1	1	0	0	0	1	176	0	1	0	0	0
101202	18222	18134	3	24	neg	neg	37.8	0	0	0	0	0	1	1	13	1	7	4	1	2	3	1	1	0	0	0	1	176	0	1	0	0	0
101202	18252	18134	4	24	neg	neg	36.5	0	0	0	0	0	1	1	13	1	7	4	1	2	3	1	1	0	0	0	1	176	0	1	0	0	0
101202	18282	18134	5	24	neg	v	36.7	0	0	0	0	0	1	1	13	1	7	4	1	2	3	1	1	0	1	0	1	176	0	1	0	0	0
101202	18290	18134	6	24	v	v	38.5	0	0	8840	40	0	1	1	13	1	7	4	1	2	3	1	1	1	1	1	1	176	0	1	0	0	0
101202	18342	18134	7	24	v	v	39	0	0	880	0	0	1	1	13	1	7	4	1	2	3	1	1	1	1	1	1	176	0	1	0	1	0
101202	18372	18134	8	24	neg	neg	37.2	0	0	0	0	0	1	1	13	1	7	4	1	2	3	1	1	0	0	0	1	176	0	1	0	0	0
101202	18402	18134	9	24	neg	v	36.5	0	0	0	0	0	1	1	13	1	7	4	1	2	3	1	1	0	1	0	1	176	0	1	0	0	0
101202	18430	18134	10	24	fv	fv	37.8	1760	0	200	0	0	1	1	13	1	7	4	1	2	3	1	1	1	1	1	1	176	0	1	0	0	0
101202	18462	18134	11	24	neg	neg	36.9	0	0	0	0	0	1	1	13	1	7	4	1	2	3	1	1	0	0	0	1	176	0	1	0	0	0
101202	18492	18134	12	24	neg	neg	36.5	0	0	0	0	0	1	1	13	1	7	4	1	2	3	1	1	0	0	0	1	176	0	1	0	0	0
101202	18522	18134	13	24	neg	neg	37.1	0	0	0	0	0	1	1	13	1	7	4	1	2	3	1	1	0	0	0	1	176	0	1	0	0	0
101202	18552	18134	14	24	v	v	37.5	0	0	240	0	0	1	1	13	1	7	4	1	2	3	1	1	1	1	1	1	176	0	1	0	0	0
101202	18582	18134	15	24	neg	neg	37	0	0	0	0	0	1	1	13	1	7	4	1	2	3	1	1	0	0	0	1	176	0	1	0	0	0
101202	18612	18134	16	24	neg	neg	37	0	0	0	0	0	1	1	13	1	7	4	1	2	3	1	1	0	0	0	1	176	0	1	0	0	0
101202	18642	18134	17	24	neg	neg	38	0	0	0	0	0	1	1	13	1	7	4	1	2	3	1	1	0	0	0	1	176	0	1	0	0	0
101202	18672	18134	18	24	neg	neg	36.7	0	0	0	0	0	1	1	13	1	7	4	1	2	3	1	1	0	0	0	1	176	0	1	0	0	0
101202	18702	18134	19	24	neg	neg	36.6	0	0	0	0	0	1	1	13	1	7	4	1	2	3	1	1	0	0	0	1	176	0	1	0	0	0
101202	18732	18134	20	24	neg	neg	37.5	0	0	0	0	0	1	1	13	1	7	4	1	2	3	1	1	0	0	0	1	176	0	1	0	0	0
101202	18762	18134	21	24	neg	neg	36.9	0	0	0	0	0	1	1	13	1	7	4	1	2	3	1	1	0	0	0	1	176	0	1	0	0	0
101202	18792	18134	22	24	neg	neg	36.7	0	0	0	0	0	1	1	13	1	7	4	1	2	3	1	1	0	0	0	1	176	0	1	0	0	0
101202	18822	18134	23	24	neg	neg	36.9	0	0	0	0	0	1	1	13	1	7	4	1	2	3	1	1	0	0	0	1	176	0	1	0	0	0
101202	18852	18134	24	24	neg	neg	36.6	0	0	0	0	0	1	1	13	1	7	4	1	2	3	1	1	0	0	0	1	176	0	1	0	0	0
101203	18477	18449	1	18	neg	neg	37	0	0	0	0		1	1	11	1	4	4	1	2	2	1	2	0	0	0	2	25648	847	3	0	0	0
101203	18507	18449	2	18	fv	fv	40	7000	0	1760	1600	1	1	1	11	1	4	4	1	2	2	1	2	1	1	1	2	25648	847	3	0	0	0
101203	18537	18449	3	18	neg	neg	37.1	0	0	0	0	1	1	1	11	1	4	4	1	2	2	1	2	0	0	0	2	25648	847	3	0	0	0
101203	18567	18449	4	18	v	v	38	0	0	6160	1440	1	1	1	11	1	4	4	1	2	2	1	2	1	1	1	2	25648	847	3	0	0	0
101203	18597	18449	5	18	neg	neg	37.7	0	0	0	0	0	1	1	11	1	4	4	1	2	2	1	2	0	0	0	2	25648	847	3	0	0	0
101203	18627	18449	6	18	neg	neg	36.8	0	0	0	0	0	1	1	11	1	4	4	1	2	2	1	2	0	0	0	2	25648	847	3	0	0	0
101203	18657	18449	7	18	neg	neg	36.9	0	0	0	0	0	1	1	11	1	4	4	1	2	2	1	2	0	0	0	2	25648	847	3	0	0	0
101203	18687	18449	8	18	neg	neg	37.1	0	0	0	0	0	1	1	11	1	4	4	1	2	2	1	2	0	0	0	2	25648	847	3	0	0	0
101203	18717	18449	9	18	neg	neg	36.6	0	0	0	0	0	1	1	11	1	4	4	1	2	2	1	2	0	0	0	2	25648	847	3	0	0	0
101203	18747	18449	10	18	neg	neg	37	0	0	0	0	0	1	1	11	1	4	4	1	2	2	1	2	0	0	0	2	25648	847	3	0	0	0
101203	18777	18449	11	18	neg	neg	36.7	0	0	0	0	0	1	1	11	1	4	4	1	2	2	1	2	0	0	0	2	25648	847	3	0	0	0
101203	18807	18449	12	18	neg	neg	36.8	0	0	0	0	0	1	1	11	1	4	4	1	2	2	1	2	0	0	0	2	25648	847	3	0	0	0
101203	18837	18449	13	18	neg	v	37	0	0	0	0	0	1	1	11	1	4	4	1	2	2	1	2	0	1	0	2	25648	847	3	0	0	0
101203	18867	18449	14	18	neg	neg	36.8	0	0	0	0	0	1	1	11	1	4	4	1	2	2	1	2	0	0	0	2	25648	847	3	0	0	0
101203	18897	18449	15	18	neg	neg	36.5	0	0	0	0	0	1	1	11	1	4	4	1	2	2	1	2	0	0	0	2	25648	847	3	0	0	0
101203	18927	18449	16	18	neg	neg	36.9	0	0	0	0	0	1	1	11	1	4	4	1	2	2	1	2	0	0	0	2	25648	847	3	0	0	0
101203	18957	18449	17	18	neg	neg	36.7	0	0	0	0	0	1	1	11	1	4	4	1	2	2	1	2	0	0	0	2	25648	847	3	0	0	0
101203	18987	18449	18	18	neg	neg	37	0	0	0	0	0	1	1	11	1	4	4	1	2	2	1	2	0	0	0	2	25648	847	3	0	0	0
101302	18362	18334	1	22	neg	neg	37.2	0	0	0	0		1	2	37	1	3	1	1	4	2	2	2	0	0	0	2	5400	200	3	0	0	0
101302	18392	18334	2	22	neg	neg	36.5	0	0	0	0	0	1	2	37	1	3	1	1	4	2	2	2	0	0	0	2	5400	200	3	0	0	0
101302	18422	18334	3	22	neg	neg	37.2	0	0	0	0	0	1	2	37	1	3	1	1	4	2	2	2	0	0	0	2	5400	200	3	0	0	0
101302	18452	18334	4	22	neg	neg	37	0	0	0	0	0	1	2	37	1	3	1	1	4	2	2	2	0	0	0	2	5400	200	3	0	0	0
101302	18472	18334	5	22	v	v	38	0	0	3730	5258	1	1	2	37	1	3	1	1	4	2	2	2	1	1	1	2	5400	200	3	0	0	0
101302	18512	18334	6	22	neg	neg	37	0	0	0	0	0	1	2	37	1	3	1	1	4	2	2	2	0	0	0	2	5400	200	3	0	0	0
101302	18542	18334	7	22	neg	neg	37.4	0	0	0	0	0	1	2	37	1	3	1	1	4	2	2	2	0	0	0	2	5400	200	3	0	0	0
101302	18572	18334	8	22	neg	neg	37	0	0	0	0	0	1	2	37	1	3	1	1	4	2	2	2	0	0	0	2	5400	200	3	0	0	0
101302	18602	18334	9	22	neg	neg	36.9	0	0	0	0	0	1	2	37	1	3	1	1	4	2	2	2	0	0	0	2	5400	200	3	0	0	0
101302	18632	18334	10	22	neg	neg	37.2	0	0	0	0	0	1	2	37	1	3	1	1	4	2	2	2	0	0	0	2	5400	200	3	0	0	0
101302	18662	18334	11	22	neg	v	37.4	0	0	0	0	0	1	2	37	1	3	1	1	4	2	2	2	0	1	0	2	5400	200	3	0	0	0
101302	18692	18334	12	22	neg	neg	36.7	0	0	0	0	0	1	2	37	1	3	1	1	4	2	2	2	0	0	0	2	5400	200	3	0	0	0
101302	18722	18334	13	22	neg	neg	36.7	0	0	0	0	0	1	2	37	1	3	1	1	4	2	2	2	0	0	0	2	5400	200	3	0	0	0
101302	18752	18334	14	22	neg	neg	37	0	0	0	0	1	1	2	37	1	3	1	1	4	2	2	2	0	0	0	2	5400	200	3	0	0	0
101302	18782	18334	15	22	neg	v	36.9	0	0	0	0	0	1	2	37	1	3	1	1	4	2	2	2	0	1	0	2	5400	200	3	0	0	0
101302	18812	18334	16	22	neg	v	37.1	0	0	0	0	0	1	2	37	1	3	1	1	4	2	2	2	0	1	0	2	5400	200	3	0	0	0
101302	18842	18334	17	22	neg	neg	36.9	0	0	0	0	0	1	2	37	1	3	1	1	4	2	2	2	0	0	0	2	5400	200	3	0	0	0
101302	18872	18334	18	22	neg	neg	36.6	0	0	0	0	0	1	2	37	1	3	1	1	4	2	2	2	0	0	0	2	5400	200	3	0	0	0
101302	18902	18334	19	22	neg	neg	36.6	0	0	0	0	0	1	2	37	1	3	1	1	4	2	2	2	0	0	0	2	5400	200	3	0	0	0
101302	18932	18334	20	22	neg	neg	36.8	0	0	0	0	0	1	2	37	1	3	1	1	4	2	2	2	0	0	0	2	5400	200	3	0	0	0
101302	18962	18334	21	22	neg	neg	36.7	0	0	0	0	0	1	2	37	1	3	1	1	4	2	2	2	0	0	0	2	5400	200	3	0	0	0
101302	18992	18334	22	22	neg	neg	36.8	0	0	0	0	0	1	2	37	1	3	1	1	4	2	2	2	0	0	0	2	5400	200	3	0	0	0
101303	18131	18103	1	24	neg	neg	36.8	0	0	0	0		1	1	6	1	0	0	1	1	1	2	2	0	0	0	1	24	0	1	0	0	0
101303	18161	18103	2	24	neg	neg	36.5	0	0	0	0	0	1	1	6	1	0	0	1	1	1	2	2	0	0	0	1	24	0	1	0	0	0
101303	18191	18103	3	24	neg	neg	36.8	0	0	0	0	0	1	1	6	1	0	0	1	1	1	2	2	0	0	0	1	24	0	1	0	0	0
101303	18221	18103	4	24	neg	neg	37.8	0	0	0	0	1	1	1	6	1	0	0	1	1	1	2	2	0	0	0	1	24	0	1	0	0	0
101303	18251	18103	5	24	neg	neg	36.5	0	0	0	0	0	1	1	6	1	0	0	1	1	1	2	2	0	0	0	1	24	0	1	0	0	0
101303	18281	18103	6	24	neg	neg	37	0	0	0	0	0	1	1	6	1	0	0	1	1	1	2	2	0	0	0	1	24	0	1	0	0	0
101303	18286	18103	7	24	v	v	37.9	0	0	17440	840	0	1	1	6	1	0	0	1	1	1	2	2	1	1	1	1	24	0	1	0	0	0
101303	18341	18103	8	24	neg	neg	37	0	0	0	0	0	1	1	6	1	0	0	1	1	1	2	2	0	0	0	1	24	0	1	0	0	0
101303	18371	18103	9	24	neg	neg	37.1	0	0	0	0	0	1	1	6	1	0	0	1	1	1	2	2	0	0	0	1	24	0	1	0	0	0
101303	18401	18103	10	24	neg	v	36.7	0	0	0	0	0	1	1	6	1	0	0	1	1	1	2	2	0	1	0	1	24	0	1	0	0	0
101303	18431	18103	11	24	neg	neg	37.2	0	0	0	0	0	1	1	6	1	0	0	1	1	1	2	2	0	0	0	1	24	0	1	0	0	0
101303	18461	18103	12	24	neg	v	37.4	0	0	0	0	0	1	1	6	1	0	0	1	1	1	2	2	0	1	0	1	24	0	1	0	0	0
101303	18491	18103	13	24	neg	v	37	0	0	0	0	0	1	1	6	1	0	0	1	1	1	2	2	0	1	0	1	24	0	1	0	0	0
101303	18521	18103	14	24	neg	neg	36.9	0	0	0	0	0	1	1	6	1	0	0	1	1	1	2	2	0	0	0	1	24	0	1	0	0	0
101303	18551	18103	15	24	neg	v	37.4	0	0	0	0	0	1	1	6	1	0	0	1	1	1	2	2	0	1	0	1	24	0	1	0	0	0
101303	18581	18103	16	24	neg	v	37	0	0	0	0	0	1	1	6	1	0	0	1	1	1	2	2	0	1	0	1	24	0	1	0	0	0
101303	18611	18103	17	24	neg	neg	37	0	0	0	0	0	1	1	6	1	0	0	1	1	1	2	2	0	0	0	1	24	0	1	0	0	0
101303	18641	18103	18	24	neg	neg	36.7	0	0	0	0	0	1	1	6	1	0	0	1	1	1	2	2	0	0	0	1	24	0	1	0	0	0
101303	18671	18103	19	24	neg	neg	37.2	0	0	0	0	0	1	1	6	1	0	0	1	1	1	2	2	0	0	0	1	24	0	1	0	0	0
101303	18701	18103	20	24	neg	neg	36.6	0	0	0	0	0	1	1	6	1	0	0	1	1	1	2	2	0	0	0	1	24	0	1	0	0	0
101303	18731	18103	21	24	neg	neg	36.8	0	0	0	0	0	1	1	6	1	0	0	1	1	1	2	2	0	0	0	1	24	0	1	0	0	0
101303	18761	18103	22	24	neg	neg	36.7	0	0	0	0	0	1	1	6	1	0	0	1	1	1	2	2	0	0	0	1	24	0	1	0	0	0
101303	18791	18103	23	24	neg	neg	36.7	0	0	0	0	0	1	1	6	1	0	0	1	1	1	2	2	0	0	0	1	24	0	1	0	0	0
101303	18821	18103	24	24	neg	neg	36.8	0	0	0	0	0	1	1	6	1	0	0	1	1	1	2	2	0	0	0	1	24	0	1	0	0	0
101304	18131	18103	1	24	neg	neg	36.8	0	0	0	0		1	2	3	1	0	0	1	1	1	2	2	0	0	0	1	1880	280	2	0	0	0
101304	18161	18103	2	24	neg	neg	36.5	0	0	0	0	0	1	2	3	1	0	0	1	1	1	2	2	0	0	0	1	1880	280	2	0	0	0
101304	18191	18103	3	24	neg	neg	36.8	0	0	0	0	0	1	2	3	1	0	0	1	1	1	2	2	0	0	0	1	1880	280	2	0	0	0
101304	18221	18103	4	24	neg	neg	37.2	0	0	0	0	0	1	2	3	1	0	0	1	1	1	2	2	0	0	0	1	1880	280	2	0	0	0
101304	18251	18103	5	24	neg	neg	36.9	0	0	0	0	0	1	2	3	1	0	0	1	1	1	2	2	0	0	0	1	1880	280	2	0	0	0
101304	18281	18103	6	24	neg	neg	36.8	0	0	0	0	0	1	2	3	1	0	0	1	1	1	2	2	0	0	0	1	1880	280	2	0	0	0
101304	18311	18103	7	24	neg	v	37	0	0	0	0	0	1	2	3	1	0	0	1	1	1	2	2	0	1	0	1	1880	280	2	0	0	0
101304	18341	18103	8	24	neg	neg	37	0	0	0	0	0	1	2	3	1	0	0	1	1	1	2	2	0	0	0	1	1880	280	2	0	0	0
101304	18371	18103	9	24	neg	neg	37.3	0	0	0	0	0	1	2	3	1	0	0	1	1	1	2	2	0	0	0	1	1880	280	2	0	0	0
101304	18401	18103	10	24	neg	neg	36.5	0	0	0	0	0	1	2	3	1	0	0	1	1	1	2	2	0	0	0	1	1880	280	2	0	0	0
101304	18431	18103	11	24	f	f	36.9	600	0	0	0	0	1	2	3	1	0	0	1	1	1	2	2	0	0	0	1	1880	280	2	0	0	1
101304	18461	18103	12	24	neg	neg	36.7	0	0	0	0	0	1	2	3	1	0	0	1	1	1	2	2	0	0	0	1	1880	280	2	0	0	0
101304	18491	18103	13	24	neg	neg	36.9	0	0	0	0	0	1	2	3	1	0	0	1	1	1	2	2	0	0	0	1	1880	280	2	0	0	0
101304	18521	18103	14	24	neg	neg	37	0	0	0	0	0	1	2	3	1	0	0	1	1	1	2	2	0	0	0	1	1880	280	2	0	0	0
101304	18551	18103	15	24	neg	neg	37	0	0	0	0	1	1	2	3	1	0	0	1	1	1	2	2	0	0	0	1	1880	280	2	0	0	0
101304	18581	18103	16	24	neg	neg	37.3	0	0	0	0	0	1	2	3	1	0	0	1	1	1	2	2	0	0	0	1	1880	280	2	0	0	0
101304	18611	18103	17	24	neg	neg	37	0	0	0	0	0	1	2	3	1	0	0	1	1	1	2	2	0	0	0	1	1880	280	2	0	0	0
101304	18641	18103	18	24	neg	neg	37	0	0	0	0	0	1	2	3	1	0	0	1	1	1	2	2	0	0	0	1	1880	280	2	0	0	0
101304	18671	18103	19	24	neg	neg	36.9	0	0	0	0	0	1	2	3	1	0	0	1	1	1	2	2	0	0	0	1	1880	280	2	0	0	0
101304	18701	18103	20	24	neg	neg	36.6	0	0	0	0	0	1	2	3	1	0	0	1	1	1	2	2	0	0	0	1	1880	280	2	0	0	0
101304	18731	18103	21	24	neg	neg	36.9	0	0	0	0	0	1	2	3	1	0	0	1	1	1	2	2	0	0	0	1	1880	280	2	0	0	0
101304	18761	18103	22	24	neg	neg	36.7	0	0	0	0	0	1	2	3	1	0	0	1	1	1	2	2	0	0	0	1	1880	280	2	0	0	0
101304	18791	18103	23	24	neg	neg	36.9	0	0	0	0	0	1	2	3	1	0	0	1	1	1	2	2	0	0	0	1	1880	280	2	0	0	0
101304	18821	18103	24	24	neg	neg	36.5	0	0	0	0	0	1	2	3	1	0	0	1	1	1	2	2	0	0	0	1	1880	280	2	0	0	0
101502	18153	18125	1	24	neg	neg	36.5	0	0	0	0		1	2	28	1	4	1	3	3	2	1	1	0	0	0	1	2360	0	2	0	0	0
101502	18183	18125	2	24	neg	neg	36.5	0	0	0	0	0	1	2	28	1	4	1	3	3	2	1	1	0	0	0	1	2360	0	2	0	0	0
101502	18213	18125	3	24	neg	neg	37	0	0	0	0	0	1	2	28	1	4	1	3	3	2	1	1	0	0	0	1	2360	0	2	0	0	0
101502	18243	18125	4	24	f	f	37	280	120	0	0	0	1	2	28	1	4	1	3	3	2	1	1	0	0	0	1	2360	0	2	0	0	1
101502	18273	18125	5	24	neg	neg	36.8	0	0	0	0	0	1	2	28	1	4	1	3	3	2	1	1	0	0	0	1	2360	0	2	0	0	0
101502	18303	18125	6	24	neg	neg	36.6	0	0	0	0	0	1	2	28	1	4	1	3	3	2	1	1	0	0	0	1	2360	0	2	0	0	0
101502	18333	18125	7	24	neg	neg	37	0	0	0	0	0	1	2	28	1	4	1	3	3	2	1	1	0	0	0	1	2360	0	2	0	0	0
101502	18363	18125	8	24	neg	neg	36.7	0	0	0	0	0	1	2	28	1	4	1	3	3	2	1	1	0	0	0	1	2360	0	2	0	0	0
101502	18393	18125	9	24	neg	neg	36.5	0	0	0	0	0	1	2	28	1	4	1	3	3	2	1	1	0	0	0	1	2360	0	2	0	0	0
101502	18423	18125	10	24	neg	neg	36.5	0	0	0	0	0	1	2	28	1	4	1	3	3	2	1	1	0	0	0	1	2360	0	2	0	0	0
101502	18515	18125	11	24	v	v	38	0	0	3640	200	0	1	2	28	1	4	1	3	3	2	1	1	1	1	1	1	2360	0	2	0	0	0
101502	18483	18125	12	24	neg	neg	36.7	0	0	0	0	0	1	2	28	1	4	1	3	3	2	1	1	0	0	0	1	2360	0	2	0	0	0
101502	18513	18125	13	24	neg	neg	36.5	0	0	0	0	0	1	2	28	1	4	1	3	3	2	1	1	0	0	0	1	2360	0	2	0	0	0
101502	18543	18125	14	24	neg	v	36.6	0	0	0	0	0	1	2	28	1	4	1	3	3	2	1	1	0	1	0	1	2360	0	2	0	0	0
101502	18573	18125	15	24	neg	neg	37.2	0	0	0	0	0	1	2	28	1	4	1	3	3	2	1	1	0	0	0	1	2360	0	2	0	0	0
101502	18603	18125	16	24	neg	neg	37	0	0	0	0	0	1	2	28	1	4	1	3	3	2	1	1	0	0	0	1	2360	0	2	0	0	0
101502	18633	18125	17	24	f	f	37.7	720	480	0	0	1	1	2	28	1	4	1	3	3	2	1	1	0	0	0	1	2360	0	2	0	0	1
101502	18663	18125	18	24	neg	neg	36.7	0	0	0	0	0	1	2	28	1	4	1	3	3	2	1	1	0	0	0	1	2360	0	2	0	0	0
101502	18693	18125	19	24	neg	neg	36.6	0	0	0	0	0	1	2	28	1	4	1	3	3	2	1	1	0	0	0	1	2360	0	2	0	0	0
101502	18723	18125	20	24	neg	v	36.6	0	0	0	0	0	1	2	28	1	4	1	3	3	2	1	1	0	1	0	1	2360	0	2	0	0	0
101502	18753	18125	21	24	neg	neg	37	0	0	0	0	0	1	2	28	1	4	1	3	3	2	1	1	0	0	0	1	2360	0	2	0	0	0
101502	18783	18125	22	24	neg	neg	36.9	0	0	0	0	0	1	2	28	1	4	1	3	3	2	1	1	0	0	0	1	2360	0	2	0	0	0
101502	18813	18125	23	24	neg	neg	37	0	0	0	0	0	1	2	28	1	4	1	3	3	2	1	1	0	0	0	1	2360	0	2	0	0	0
101502	18843	18125	24	24	neg	neg	36.8	0	0	0	0	0	1	2	28	1	4	1	3	3	2	1	1	0	0	0	1	2360	0	2	0	0	0
101503	18146	18118	1	24	neg	neg	36.5	0	0	0	0		1	1	9	1	1	4	3	1	2	1	1	0	0	0	1	32	0	1	0	0	0
101503	18176	18118	2	24	neg	neg	36.7	0	0	0	0	0	1	1	9	1	1	4	3	1	2	1	1	0	0	0	1	32	0	1	0	0	0
101503	18206	18118	3	24	neg	neg	36.8	0	0	0	0	0	1	1	9	1	1	4	3	1	2	1	1	0	0	0	1	32	0	1	0	0	0
101503	18235	18118	4	24	neg	neg	36.8	0	0	0	0	0	1	1	9	1	1	4	3	1	2	1	1	0	0	0	1	32	0	1	0	0	0
101503	18266	18118	5	24	neg	v	36.8	0	0	0	0	0	1	1	9	1	1	4	3	1	2	1	1	0	1	0	1	32	0	1	0	0	0
101503	18296	18118	6	24	neg	neg	36.6	0	0	0	0	0	1	1	9	1	1	4	3	1	2	1	1	0	0	0	1	32	0	1	0	0	0
101503	18326	18118	7	24	neg	v	37.2	0	0	0	0	0	1	1	9	1	1	4	3	1	2	1	1	0	1	0	1	32	0	1	0	0	0
101503	18356	18118	8	24	neg	neg	37.1	0	0	0	0	1	1	1	9	1	1	4	3	1	2	1	1	0	0	0	1	32	0	1	0	0	0
101503	18386	18118	9	24	neg	neg	36.8	0	0	0	0	0	1	1	9	1	1	4	3	1	2	1	1	0	0	0	1	32	0	1	0	0	0
101503	18416	18118	10	24	neg	neg	37	0	0	0	0	0	1	1	9	1	1	4	3	1	2	1	1	0	0	0	1	32	0	1	0	0	0
101503	18446	18118	11	24	neg	neg	36.5	0	0	0	0	0	1	1	9	1	1	4	3	1	2	1	1	0	0	0	1	32	0	1	0	0	0
101503	18476	18118	12	24	neg	v	37.3	0	0	0	0	0	1	1	9	1	1	4	3	1	2	1	1	0	1	0	1	32	0	1	0	0	0
101503	18506	18118	13	24	neg	neg	36.6	0	0	0	0	0	1	1	9	1	1	4	3	1	2	1	1	0	0	0	1	32	0	1	0	0	0
101503	18536	18118	14	24	neg	neg	36.8	0	0	0	0	0	1	1	9	1	1	4	3	1	2	1	1	0	0	0	1	32	0	1	0	0	0
101503	18566	18118	15	24	neg	v	37	0	0	0	0	0	1	1	9	1	1	4	3	1	2	1	1	0	1	0	1	32	0	1	0	0	0
101503	18596	18118	16	24	neg	neg	37	0	0	0	0	0	1	1	9	1	1	4	3	1	2	1	1	0	0	0	1	32	0	1	0	0	0
101503	18626	18118	17	24	neg	neg	36.9	0	0	0	0	0	1	1	9	1	1	4	3	1	2	1	1	0	0	0	1	32	0	1	0	0	0
101503	18656	18118	18	24	neg	neg	36.7	0	0	0	0	0	1	1	9	1	1	4	3	1	2	1	1	0	0	0	1	32	0	1	0	0	0
101503	18686	18118	19	24	neg	neg	36.6	0	0	0	0	0	1	1	9	1	1	4	3	1	2	1	1	0	0	0	1	32	0	1	0	0	0
101503	18716	18118	20	24	neg	neg	36.5	0	0	0	0	0	1	1	9	1	1	4	3	1	2	1	1	0	0	0	1	32	0	1	0	0	0
101503	18746	18118	21	24	neg	neg	36.7	0	0	0	0	0	1	1	9	1	1	4	3	1	2	1	1	0	0	0	1	32	0	1	0	0	0
101503	18776	18118	22	24	neg	neg	36.8	0	0	0	0	0	1	1	9	1	1	4	3	1	2	1	1	0	0	0	1	32	0	1	0	0	0
101503	18806	18118	23	24	neg	neg	36.8	0	0	0	0	0	1	1	9	1	1	4	3	1	2	1	1	0	0	0	1	32	0	1	0	0	0
101503	18836	18118	24	24	neg	neg	36.9	0	0	0	0	0	1	1	9	1	1	4	3	1	2	1	1	0	0	0	1	32	0	1	0	0	0
101505	18121	18093	1	24	neg	neg	36.8	0	0	0	0		1	1	4	1	0	4	3	1	1	1	2	0	0	0	1	640	200	1	0	0	0
101505	18151	18093	2	24	neg	neg	36.5	0	0	0	0	0	1	1	4	1	0	4	3	1	1	1	2	0	0	0	1	640	200	1	0	0	0
101505	18181	18093	3	24	v	v	37.3	0	0	24	16	0	1	1	4	1	0	4	3	1	1	1	2	1	1	0	1	640	200	1	0	0	0
101505	18211	18093	4	24	neg	neg	36.5	0	0	0	0	0	1	1	4	1	0	4	3	1	1	1	2	0	0	0	1	640	200	1	0	0	0
101505	18241	18093	5	24	neg	neg	36.5	0	0	0	0	0	1	1	4	1	0	4	3	1	1	1	2	0	0	0	1	640	200	1	0	0	0
101505	18271	18093	6	24	v	v	39.7	0	0	22920	840	0	1	1	4	1	0	4	3	1	1	1	2	1	1	1	1	640	200	1	0	0	0
101505	18301	18093	7	24	neg	neg	36.5	0	0	0	0	0	1	1	4	1	0	4	3	1	1	1	2	0	0	0	1	640	200	1	0	0	0
101505	18324	18093	8	24	v	v	37.2	0	0	1440	200	1	1	1	4	1	0	4	3	1	1	1	2	1	1	0	1	640	200	1	0	0	0
101505	18361	18093	9	24	v	v	37	0	0	160	128	0	1	1	4	1	0	4	3	1	1	1	2	1	1	0	1	640	200	1	0	1	0
101505	18391	18093	10	24	neg	neg	36.7	0	0	0	0	0	1	1	4	1	0	4	3	1	1	1	2	0	0	0	1	640	200	1	0	0	0
101505	18416	18093	11	24	f	f	39.1	75471	0	0	0	1	1	1	4	1	0	4	3	1	1	1	2	0	0	0	1	640	200	1	0	0	1
101505	18451	18093	12	24	neg	neg	37.3	0	0	0	0	0	1	1	4	1	0	4	3	1	1	1	2	0	0	0	1	640	200	1	0	0	0
101505	18481	18093	13	24	v	v	36.7	0	0	272	32	0	1	1	4	1	0	4	3	1	1	1	2	1	1	0	1	640	200	1	0	0	0
101505	18511	18093	14	24	neg	neg	37	0	0	0	0	0	1	1	4	1	0	4	3	1	1	1	2	0	0	0	1	640	200	1	0	0	0
101505	18541	18093	15	24	neg	neg	36.6	0	0	0	0	0	1	1	4	1	0	4	3	1	1	1	2	0	0	0	1	640	200	1	0	0	0
101505	18571	18093	16	24	neg	neg	37	0	0	0	0	0	1	1	4	1	0	4	3	1	1	1	2	0	0	0	1	640	200	1	0	0	0
101505	18601	18093	17	24	neg	neg	36.8	0	0	0	0	0	1	1	4	1	0	4	3	1	1	1	2	0	0	0	1	640	200	1	0	0	0
101505	18617	18093	18	24	f	f	38.1	13680	0	0	0	1	1	1	4	1	0	4	3	1	1	1	2	0	0	0	1	640	200	1	0	0	1
101505	18661	18093	19	24	neg	neg	36.6	0	0	0	0	0	1	1	4	1	0	4	3	1	1	1	2	0	0	0	1	640	200	1	0	0	0
101505	18691	18093	20	24	neg	neg	36.7	0	0	0	0	0	1	1	4	1	0	4	3	1	1	1	2	0	0	0	1	640	200	1	0	0	0
101505	18721	18093	21	24	neg	neg	36.6	0	0	0	0	0	1	1	4	1	0	4	3	1	1	1	2	0	0	0	1	640	200	1	0	0	0
101505	18751	18093	22	24	neg	neg	37	0	0	0	0	0	1	1	4	1	0	4	3	1	1	1	2	0	0	0	1	640	200	1	0	0	0
101505	18781	18093	23	24	neg	neg	36.8	0	0	0	0	0	1	1	4	1	0	4	3	1	1	1	2	0	0	0	1	640	200	1	0	0	0
101505	18811	18093	24	24	neg	neg	36.8	0	0	0	0	0	1	1	4	1	0	4	3	1	1	1	2	0	0	0	1	640	200	1	0	0	0
101604	18229	18201	1	6	neg	neg	36.5	0	0	0	0		1	2	16	1	10	4	3	2	3	1	1	0	0	0	1	2320	120	2	0	0	0
101604	18259	18201	2	6	neg	neg	37.9	0	0	0	0	1	1	2	16	1	10	4	3	2	3	1	1	0	0	0	1	2320	120	2	0	0	0
101604	18289	18201	3	6	neg	neg	36.5	0	0	0	0	0	1	2	16	1	10	4	3	2	3	1	1	0	0	0	1	2320	120	2	0	0	0
101604	18320	18201	4	6	neg	neg	36.7	0	0	0	0	0	1	2	16	1	10	4	3	2	3	1	1	0	0	0	1	2320	120	2	0	0	0
101604	18349	18201	5	6	neg	neg	37.1	0	0	0	0	0	1	2	16	1	10	4	3	2	3	1	1	0	0	0	1	2320	120	2	0	0	0
101604	18379	18201	6	6	neg	neg	36.8	0	0	0	0	0	1	2	16	1	10	4	3	2	3	1	1	0	0	0	1	2320	120	2	0	0	0
101606	18064	18032	1	24	neg	neg	37	0	0	0	0		1	1	8	1	2	4	3	1	2	1	2	0	0	0	1	24	0	1	0	0	0
101606	18090	18032	2	24	neg	neg	37.3	0	0	0	0	0	1	1	8	1	2	4	3	1	2	1	2	0	0	0	1	24	0	1	0	0	0
101606	18120	18032	3	24	f	f	37.3	3320	0	0	0	0	1	1	8	1	2	4	3	1	2	1	2	0	0	0	1	24	0	1	0	0	1
101606	18150	18032	4	24	neg	neg	36.5	0	0	0	0	0	1	1	8	1	2	4	3	1	2	1	2	0	0	0	1	24	0	1	0	0	0
101606	18180	18032	5	24	neg	neg	36.5	0	0	0	0	0	1	1	8	1	2	4	3	1	2	1	2	0	0	0	1	24	0	1	0	0	0
101606	18210	18032	6	24	neg	neg	36.5	0	0	0	0	0	1	1	8	1	2	4	3	1	2	1	2	0	0	0	1	24	0	1	0	0	0
101606	18240	18032	7	24	neg	neg	36.7	0	0	0	0	0	1	1	8	1	2	4	3	1	2	1	2	0	0	0	1	24	0	1	0	0	0
101606	18270	18032	8	24	neg	neg	36.7	0	0	0	0	0	1	1	8	1	2	4	3	1	2	1	2	0	0	0	1	24	0	1	0	0	0
101606	18300	18032	9	24	neg	neg	36.7	0	0	0	0	0	1	1	8	1	2	4	3	1	2	1	2	0	0	0	1	24	0	1	0	0	0
101606	18330	18032	10	24	neg	neg	37	0	0	0	0	0	1	1	8	1	2	4	3	1	2	1	2	0	0	0	1	24	0	1	0	0	0
101606	18360	18032	11	24	neg	neg	36.5	0	0	0	0	0	1	1	8	1	2	4	3	1	2	1	2	0	0	0	1	24	0	1	0	0	0
101606	18390	18032	12	24	f	f	37	2840	360	0	0	0	1	1	8	1	2	4	3	1	2	1	2	0	0	0	1	24	0	1	0	0	1
101606	18420	18032	13	24	neg	neg	36.8	0	0	0	0	0	1	1	8	1	2	4	3	1	2	1	2	0	0	0	1	24	0	1	0	0	0
101606	18450	18032	14	24	neg	neg	36.7	0	0	0	0	0	1	1	8	1	2	4	3	1	2	1	2	0	0	0	1	24	0	1	0	0	0
101606	18480	18032	15	24	neg	v	37.3	0	0	0	0	0	1	1	8	1	2	4	3	1	2	1	2	0	1	0	1	24	0	1	0	0	0
101606	18511	18032	16	24	neg	v	37	0	0	0	0	0	1	1	8	1	2	4	3	1	2	1	2	0	1	0	1	24	0	1	0	0	0
101606	18540	18032	17	24	neg	neg	36.9	0	0	0	0	0	1	1	8	1	2	4	3	1	2	1	2	0	0	0	1	24	0	1	0	0	0
101606	18570	18032	18	24	neg	neg	37	0	0	0	0	0	1	1	8	1	2	4	3	1	2	1	2	0	0	0	1	24	0	1	0	0	0
101606	18600	18032	19	24	neg	neg	36.7	0	0	0	0	0	1	1	8	1	2	4	3	1	2	1	2	0	0	0	1	24	0	1	0	0	0
101606	18630	18032	20	24	neg	neg	36.8	0	0	0	0	0	1	1	8	1	2	4	3	1	2	1	2	0	0	0	1	24	0	1	0	0	0
101606	18660	18032	21	24	neg	v	37	0	0	0	0	0	1	1	8	1	2	4	3	1	2	1	2	0	1	0	1	24	0	1	0	0	0
101606	18690	18032	22	24	neg	neg	36.6	0	0	0	0	0	1	1	8	1	2	4	3	1	2	1	2	0	0	0	1	24	0	1	0	0	0
101606	18720	18032	23	24	neg	neg	36.5	0	0	0	0	0	1	1	8	1	2	4	3	1	2	1	2	0	0	0	1	24	0	1	0	0	0
101606	18750	18032	24	24	neg	v	36.9	0	0	0	0	0	1	1	8	1	2	4	3	1	2	1	2	0	1	0	1	24	0	1	0	0	0
101705	18629	18601	1	13	neg	neg	36.7	0	0	0	0		1	2	3	1	0	4	1	1	1	1	1	0	0	0	2	10760	1240	3	0	0	0
101705	18659	18601	2	13	neg	neg	36.7	0	0	0	0	0	1	2	3	1	0	4	1	1	1	1	1	0	0	0	2	10760	1240	3	0	0	0
101705	18689	18601	3	13	neg	neg	36.7	0	0	0	0	0	1	2	3	1	0	4	1	1	1	1	1	0	0	0	2	10760	1240	3	0	0	0
101705	18719	18601	4	13	neg	neg	36.6	0	0	0	0	0	1	2	3	1	0	4	1	1	1	1	1	0	0	0	2	10760	1240	3	0	0	0
101705	18749	18601	5	13	neg	neg	36.6	0	0	0	0	0	1	2	3	1	0	4	1	1	1	1	1	0	0	0	2	10760	1240	3	0	0	0
101705	18779	18601	6	13	neg	neg	36.7	0	0	0	0	0	1	2	3	1	0	4	1	1	1	1	1	0	0	0	2	10760	1240	3	0	0	0
101705	18809	18601	7	13	neg	neg	36.7	0	0	0	0	0	1	2	3	1	0	4	1	1	1	1	1	0	0	0	2	10760	1240	3	0	0	0
101705	18839	18601	8	13	neg	neg	36.8	0	0	0	0	0	1	2	3	1	0	4	1	1	1	1	1	0	0	0	2	10760	1240	3	0	0	0
101705	18869	18601	9	13	neg	neg	36.5	0	0	0	0	0	1	2	3	1	0	4	1	1	1	1	1	0	0	0	2	10760	1240	3	0	0	0
101705	18899	18601	10	13	neg	v	36.9	0	0	0	0	0	1	2	3	1	0	4	1	1	1	1	1	0	1	0	2	10760	1240	3	0	0	0
101705	18929	18601	11	13	neg	neg	37	0	0	0	0	0	1	2	3	1	0	4	1	1	1	1	1	0	0	0	2	10760	1240	3	0	0	0
101705	18959	18601	12	13	neg	neg	36.7	0	0	0	0	0	1	2	3	1	0	4	1	1	1	1	1	0	0	0	2	10760	1240	3	0	0	0
101705	18989	18601	13	13	neg	neg	36.8	0	0	0	0	0	1	2	3	1	0	4	1	1	1	1	1	0	0	0	2	10760	1240	3	0	0	0
101901	18484	18470	1	17	f	f	37.1	2004	0	0	0		1	1	42	1	8	1	1	4	3	2	2	0	0	0	2	680	280	1	0	0	1
101901	18528	18470	2	17	neg	neg	36.5	0	0	0	0	0	1	1	42	1	8	1	1	4	3	2	2	0	0	0	2	680	280	1	0	0	0
101901	18558	18470	3	17	neg	neg	37	0	0	0	0	0	1	1	42	1	8	1	1	4	3	2	2	0	0	0	2	680	280	1	0	0	0
101901	18588	18470	4	17	f	f	37.2	8200	0	0	0	1	1	1	42	1	8	1	1	4	3	2	2	0	0	0	2	680	280	1	0	0	1
101901	18618	18470	5	17	neg	neg	36.9	0	0	0	0	0	1	1	42	1	8	1	1	4	3	2	2	0	0	0	2	680	280	1	0	0	0
101901	18648	18470	6	17	neg	neg	36.7	0	0	0	0	0	1	1	42	1	8	1	1	4	3	2	2	0	0	0	2	680	280	1	0	0	0
101901	18678	18470	7	17	neg	neg	36.7	0	0	0	0	0	1	1	42	1	8	1	1	4	3	2	2	0	0	0	2	680	280	1	0	0	0
101901	18708	18470	8	17	neg	neg	36.7	0	0	0	0	0	1	1	42	1	8	1	1	4	3	2	2	0	0	0	2	680	280	1	0	0	0
101901	18738	18470	9	17	neg	neg	36.9	0	0	0	0	0	1	1	42	1	8	1	1	4	3	2	2	0	0	0	2	680	280	1	0	0	0
101901	18768	18470	10	17	neg	neg	36.9	0	0	0	0	0	1	1	42	1	8	1	1	4	3	2	2	0	0	0	2	680	280	1	0	0	0
101901	18798	18470	11	17	neg	neg	37.2	0	0	0	0	0	1	1	42	1	8	1	1	4	3	2	2	0	0	0	2	680	280	1	0	0	0
101901	18828	18470	12	17	neg	neg	36.6	0	0	0	0	0	1	1	42	1	8	1	1	4	3	2	2	0	0	0	2	680	280	1	0	0	0
101901	18858	18470	13	17	neg	neg	36.6	0	0	0	0	0	1	1	42	1	8	1	1	4	3	2	2	0	0	0	2	680	280	1	0	0	0
101901	18888	18470	14	17	neg	neg	36.9	0	0	0	0	0	1	1	42	1	8	1	1	4	3	2	2	0	0	0	2	680	280	1	0	0	0
101901	18918	18470	15	17	neg	neg	37	0	0	0	0	0	1	1	42	1	8	1	1	4	3	2	2	0	0	0	2	680	280	1	0	0	0
101901	18948	18470	16	17	neg	neg	36.9	0	0	0	0	0	1	1	42	1	8	1	1	4	3	2	2	0	0	0	2	680	280	1	0	0	0
101901	18978	18470	17	17	neg	neg	37	0	0	0	0	0	1	1	42	1	8	1	1	4	3	2	2	0	0	0	2	680	280	1	0	0	0
101903	18409	18381	1	20	neg	neg	36.5	0	0	0	0		1	2	7	1	1	4	1	1	2	2	2	0	0	0	2	10400	560	3	0	0	0
101903	18421	18381	2	20	neg	v	39.5	49382	0	0	0	1	1	2	7	1	1	4	1	1	2	2	2	0	1	0	2	10400	560	3	0	0	0
101903	18460	18381	3	20	neg	neg	39.7	56003	114	0	0	1	1	2	7	1	1	4	1	1	2	2	2	0	0	0	2	10400	560	3	0	0	0
101903	18499	18381	4	20	neg	neg	37	0	0	0	0	0	1	2	7	1	1	4	1	1	2	2	2	0	0	0	2	10400	560	3	0	0	0
101903	18529	18381	5	20	neg	neg	37.5	0	0	0	0	0	1	2	7	1	1	4	1	1	2	2	2	0	0	0	2	10400	560	3	0	0	0
101903	18548	18381	6	20	v	v	37	0	0	1464	6535	1	1	2	7	1	1	4	1	1	2	2	2	1	1	0	2	10400	560	3	0	0	0
101903	18589	18381	7	20	v	v	36.8	0	0	240	40	0	1	2	7	1	1	4	1	1	2	2	2	1	1	0	2	10400	560	3	0	1	0
101903	18619	18381	8	20	neg	neg	36.8	0	0	0	0	0	1	2	7	1	1	4	1	1	2	2	2	0	0	0	2	10400	560	3	0	0	0
101903	18626	18381	9	20	v	v	37	0	0	360	0	0	1	2	7	1	1	4	1	1	2	2	2	1	1	0	2	10400	560	3	0	0	0
101903	18679	18381	10	20	v	v	37.3	0	0	1840	224	0	1	2	7	1	1	4	1	1	2	2	2	1	1	0	2	10400	560	3	0	1	0
101903	18709	18381	11	20	neg	neg	36.6	0	0	0	0	0	1	2	7	1	1	4	1	1	2	2	2	0	0	0	2	10400	560	3	0	0	0
101903	18739	18381	12	20	neg	neg	37.5	0	0	0	0	0	1	2	7	1	1	4	1	1	2	2	2	0	0	0	2	10400	560	3	0	0	0
101903	18769	18381	13	20	v	v	37.3	0	0	1360	120	0	1	2	7	1	1	4	1	1	2	2	2	1	1	0	2	10400	560	3	0	0	0
101903	18799	18381	14	20	v	v	37	0	0	280	40	0	1	2	7	1	1	4	1	1	2	2	2	1	1	0	2	10400	560	3	0	1	0
101903	18829	18381	15	20	neg	neg	36.8	0	0	0	0	0	1	2	7	1	1	4	1	1	2	2	2	0	0	0	2	10400	560	3	0	0	0
101903	18859	18381	16	20	neg	neg	36.6	0	0	0	0	0	1	2	7	1	1	4	1	1	2	2	2	0	0	0	2	10400	560	3	0	0	0
101903	18889	18381	17	20	neg	v	36.5	0	0	0	0	0	1	2	7	1	1	4	1	1	2	2	2	0	1	0	2	10400	560	3	0	0	0
101903	18919	18381	18	20	neg	v	36.8	0	0	0	0	0	1	2	7	1	1	4	1	1	2	2	2	0	1	0	2	10400	560	3	0	0	0
101903	18949	18381	19	20	neg	neg	37	0	0	0	0	0	1	2	7	1	1	4	1	1	2	2	2	0	0	0	2	10400	560	3	0	0	0
101903	18979	18381	20	20	neg	neg	36.8	0	0	0	0	0	1	2	7	1	1	4	1	1	2	2	2	0	0	0	2	10400	560	3	0	0	0
102101	18095	18067	1	24	neg	neg	36.8	0	0	0	0		1	1	25	1	3	1	1	3	2	1	2	0	0	0	1	10120	1920	3	0	0	0
102101	18170	18067	2	24	f	f	40.1	1680	0	0	0	0	1	1	25	1	3	1	1	3	2	1	2	0	0	0	1	10120	1920	3	0	0	1
102101	18155	18067	3	24	neg	neg	36.5	0	0	0	0	0	1	1	25	1	3	1	1	3	2	1	2	0	0	0	1	10120	1920	3	0	0	0
102101	18185	18067	4	24	neg	neg	36.7	0	0	0	0	0	1	1	25	1	3	1	1	3	2	1	2	0	0	0	1	10120	1920	3	0	0	0
102101	18215	18067	5	24	neg	neg	36.6	0	0	0	0	0	1	1	25	1	3	1	1	3	2	1	2	0	0	0	1	10120	1920	3	0	0	0
102101	18245	18067	6	24	neg	neg	36.5	0	0	0	0	0	1	1	25	1	3	1	1	3	2	1	2	0	0	0	1	10120	1920	3	0	0	0
102101	18275	18067	7	24	neg	neg	37.1	0	0	0	0	0	1	1	25	1	3	1	1	3	2	1	2	0	0	0	1	10120	1920	3	0	0	0
102101	18305	18067	8	24	neg	neg	36.6	0	0	0	0	0	1	1	25	1	3	1	1	3	2	1	2	0	0	0	1	10120	1920	3	0	0	0
102101	18335	18067	9	24	neg	neg	37	0	0	0	0	0	1	1	25	1	3	1	1	3	2	1	2	0	0	0	1	10120	1920	3	0	0	0
102101	18365	18067	10	24	neg	neg	36.7	0	0	0	0	0	1	1	25	1	3	1	1	3	2	1	2	0	0	0	1	10120	1920	3	0	0	0
102101	18393	18067	11	24	v	v	37.2	0	0	560	0	0	1	1	25	1	3	1	1	3	2	1	2	1	1	0	1	10120	1920	3	0	0	0
102101	18413	18067	12	24	f	f	37	8480	0	0	0	1	1	1	25	1	3	1	1	3	2	1	2	0	0	0	1	10120	1920	3	0	0	1
102101	18455	18067	13	24	neg	neg	36.8	0	0	0	0	0	1	1	25	1	3	1	1	3	2	1	2	0	0	0	1	10120	1920	3	0	0	0
102101	18485	18067	14	24	neg	neg	36.7	0	0	0	0	0	1	1	25	1	3	1	1	3	2	1	2	0	0	0	1	10120	1920	3	0	0	0
102101	18515	18067	15	24	v	v	38.5	0	0	271	1310	1	1	1	25	1	3	1	1	3	2	1	2	1	1	1	1	10120	1920	3	0	0	0
102101	18545	18067	16	24	neg	neg	37	0	0	0	0	0	1	1	25	1	3	1	1	3	2	1	2	0	0	0	1	10120	1920	3	0	0	0
102101	18575	18067	17	24	neg	neg	37	0	0	0	0	0	1	1	25	1	3	1	1	3	2	1	2	0	0	0	1	10120	1920	3	0	0	0
102101	18605	18067	18	24	neg	fv	37	0	0	0	0	0	1	1	25	1	3	1	1	3	2	1	2	0	1	0	1	10120	1920	3	0	0	0
102101	18635	18067	19	24	neg	f	36.7	0	0	0	0	0	1	1	25	1	3	1	1	3	2	1	2	0	0	0	1	10120	1920	3	0	0	0
102101	18665	18067	20	24	neg	neg	36.6	0	0	0	0	0	1	1	25	1	3	1	1	3	2	1	2	0	0	0	1	10120	1920	3	0	0	0
102101	18695	18067	21	24	neg	neg	36.5	0	0	0	0	0	1	1	25	1	3	1	1	3	2	1	2	0	0	0	1	10120	1920	3	0	0	0
102101	18725	18067	22	24	neg	neg	36.6	0	0	0	0	0	1	1	25	1	3	1	1	3	2	1	2	0	0	0	1	10120	1920	3	0	0	0
102101	18755	18067	23	24	v	v	36.7	0	0	360	80	0	1	1	25	1	3	1	1	3	2	1	2	1	1	0	1	10120	1920	3	0	0	0
102101	18785	18067	24	24	neg	neg	36.7	0	0	0	0	0	1	1	25	1	3	1	1	3	2	1	2	0	0	0	1	10120	1920	3	0	0	0
102103	18479	18451	1	18	neg	neg	37.3	0	0	0	0		1	2	5	1	0	0	1	1	1	1	2	0	0	0	2	10611	500	3	0	0	0
102103	18509	18451	2	18	neg	neg	36.9	0	0	0	0	0	1	2	5	1	0	0	1	1	1	1	2	0	0	0	2	10611	500	3	0	0	0
102103	18520	18451	3	18	v	v	37.2	0	0	1070	80	1	1	2	5	1	0	0	1	1	1	1	2	1	1	0	2	10611	500	3	0	0	0
102103	18569	18451	4	18	neg	neg	37	0	0	0	0	0	1	2	5	1	0	0	1	1	1	1	2	0	0	0	2	10611	500	3	0	0	0
102103	18599	18451	5	18	neg	neg	36.8	0	0	0	0	0	1	2	5	1	0	0	1	1	1	1	2	0	0	0	2	10611	500	3	0	0	0
102103	18629	18451	6	18	neg	neg	37.2	0	0	0	0	0	1	2	5	1	0	0	1	1	1	1	2	0	0	0	2	10611	500	3	0	0	0
102103	18642	18451	7	18	v	v	37	0	0	520	40	1	1	2	5	1	0	0	1	1	1	1	2	1	1	0	2	10611	500	3	0	0	0
102103	18689	18451	8	18	neg	v	36.6	0	0	0	0	0	1	2	5	1	0	0	1	1	1	1	2	0	1	0	2	10611	500	3	0	1	0
102103	18719	18451	9	18	neg	neg	36.5	0	0	0	0	0	1	2	5	1	0	0	1	1	1	1	2	0	0	0	2	10611	500	3	0	0	0
102103	18749	18451	10	18	neg	neg	36.8	0	0	0	0	0	1	2	5	1	0	0	1	1	1	1	2	0	0	0	2	10611	500	3	0	0	0
102103	18779	18451	11	18	neg	neg	36.7	0	0	0	0	0	1	2	5	1	0	0	1	1	1	1	2	0	0	0	2	10611	500	3	0	0	0
102103	18809	18451	12	18	neg	neg	37	0	0	0	0	0	1	2	5	1	0	0	1	1	1	1	2	0	0	0	2	10611	500	3	0	0	0
102103	18839	18451	13	18	neg	neg	36.8	0	0	0	0	0	1	2	5	1	0	0	1	1	1	1	2	0	0	0	2	10611	500	3	0	0	0
102103	18869	18451	14	18	neg	neg	36.9	0	0	0	0	0	1	2	5	1	0	0	1	1	1	1	2	0	0	0	2	10611	500	3	0	0	0
102103	18899	18451	15	18	neg	neg	36.9	0	0	0	0	0	1	2	5	1	0	0	1	1	1	1	2	0	0	0	2	10611	500	3	0	0	0
102103	18929	18451	16	18	neg	neg	37	0	0	0	0	0	1	2	5	1	0	0	1	1	1	1	2	0	0	0	2	10611	500	3	0	0	0
102103	18959	18451	17	18	neg	neg	36.8	0	0	0	0	0	1	2	5	1	0	0	1	1	1	1	2	0	0	0	2	10611	500	3	0	0	0
102103	18989	18451	18	18	neg	neg	37	0	0	0	0	0	1	2	5	1	0	0	1	1	1	1	2	0	0	0	2	10611	500	3	0	0	0
102203	18464	18436	1	18	neg	neg	36.9	0	0	0	0		1	1	8	1	1	4	1	1	2	1	2	0	0	0	2	4080	400	2	0	0	0
102203	18494	18436	2	18	neg	neg	37.3	0	0	0	0	0	1	1	8	1	1	4	1	1	2	1	2	0	0	0	2	4080	400	2	0	0	0
102203	18524	18436	3	18	neg	neg	37.5	0	0	0	0	0	1	1	8	1	1	4	1	1	2	1	2	0	0	0	2	4080	400	2	0	0	0
102203	18554	18436	4	18	neg	neg	37	0	0	0	0	0	1	1	8	1	1	4	1	1	2	1	2	0	0	0	2	4080	400	2	0	0	0
102203	18584	18436	5	18	neg	neg	36.9	0	0	0	0	0	1	1	8	1	1	4	1	1	2	1	2	0	0	0	2	4080	400	2	0	0	0
102203	18614	18436	6	18	neg	neg	36.7	0	0	0	0	0	1	1	8	1	1	4	1	1	2	1	2	0	0	0	2	4080	400	2	0	0	0
102203	18644	18436	7	18	neg	neg	36.6	0	0	0	0	0	1	1	8	1	1	4	1	1	2	1	2	0	0	0	2	4080	400	2	0	0	0
102203	18674	18436	8	18	neg	neg	37.6	0	0	0	0	0	1	1	8	1	1	4	1	1	2	1	2	0	0	0	2	4080	400	2	0	0	0
102203	18704	18436	9	18	neg	neg	36.6	0	0	0	0	0	1	1	8	1	1	4	1	1	2	1	2	0	0	0	2	4080	400	2	0	0	0
102203	18734	18436	10	18	neg	neg	36.8	0	0	0	0	0	1	1	8	1	1	4	1	1	2	1	2	0	0	0	2	4080	400	2	0	0	0
102203	18764	18436	11	18	neg	neg	36.9	0	0	0	0	0	1	1	8	1	1	4	1	1	2	1	2	0	0	0	2	4080	400	2	0	0	0
102203	18794	18436	12	18	neg	neg	37	0	0	0	0	0	1	1	8	1	1	4	1	1	2	1	2	0	0	0	2	4080	400	2	0	0	0
102203	18824	18436	13	18	neg	neg	36.9	0	0	0	0	0	1	1	8	1	1	4	1	1	2	1	2	0	0	0	2	4080	400	2	0	0	0
102203	18854	18436	14	18	neg	neg	36.6	0	0	0	0	0	1	1	8	1	1	4	1	1	2	1	2	0	0	0	2	4080	400	2	0	0	0
102203	18884	18436	15	18	neg	neg	36.5	0	0	0	0	0	1	1	8	1	1	4	1	1	2	1	2	0	0	0	2	4080	400	2	0	0	0
102203	18914	18436	16	18	neg	neg	36.8	0	0	0	0	0	1	1	8	1	1	4	1	1	2	1	2	0	0	0	2	4080	400	2	0	0	0
102203	18944	18436	17	18	neg	neg	36.8	0	0	0	0	0	1	1	8	1	1	4	1	1	2	1	2	0	0	0	2	4080	400	2	0	0	0
102203	18974	18436	18	18	neg	neg	36.8	0	0	0	0	0	1	1	8	1	1	4	1	1	2	1	2	0	0	0	2	4080	400	2	0	0	0
102204	18425	18397	1	19	neg	neg	36.8	0	0	0	0		1	2	3	1	0	4	1	1	1	1	2	0	0	0	2	66206	2758	3	0	0	0
102204	18455	18397	2	19	neg	neg	37.3	0	0	0	0	0	1	2	3	1	0	4	1	1	1	1	2	0	0	0	2	66206	2758	3	0	0	0
102204	18485	18397	3	19	neg	v	36.7	0	0	0	0	0	1	2	3	1	0	4	1	1	1	1	2	0	1	0	2	66206	2758	3	0	0	0
102204	18515	18397	4	19	neg	neg	37	0	0	0	0	0	1	2	3	1	0	4	1	1	1	1	2	0	0	0	2	66206	2758	3	0	0	0
102204	18545	18397	5	19	neg	neg	36.8	0	0	0	0	0	1	2	3	1	0	4	1	1	1	1	2	0	0	0	2	66206	2758	3	0	0	0
102204	18575	18397	6	19	neg	neg	37	0	0	0	0	0	1	2	3	1	0	4	1	1	1	1	2	0	0	0	2	66206	2758	3	0	0	0
102204	18605	18397	7	19	neg	neg	37	0	0	0	0	0	1	2	3	1	0	4	1	1	1	1	2	0	0	0	2	66206	2758	3	0	0	0
102204	18635	18397	8	19	neg	neg	36.8	0	0	0	0	0	1	2	3	1	0	4	1	1	1	1	2	0	0	0	2	66206	2758	3	0	0	0
102204	18665	18397	9	19	neg	neg	36.7	0	0	0	0	0	1	2	3	1	0	4	1	1	1	1	2	0	0	0	2	66206	2758	3	0	0	0
102204	18695	18397	10	19	neg	neg	36.6	0	0	0	0	0	1	2	3	1	0	4	1	1	1	1	2	0	0	0	2	66206	2758	3	0	0	0
102204	18725	18397	11	19	neg	neg	36.5	0	0	0	0	0	1	2	3	1	0	4	1	1	1	1	2	0	0	0	2	66206	2758	3	0	0	0
102204	18755	18397	12	19	neg	neg	36.7	0	0	0	0	0	1	2	3	1	0	4	1	1	1	1	2	0	0	0	2	66206	2758	3	0	0	0
102204	18785	18397	13	19	neg	neg	36.9	0	0	0	0	0	1	2	3	1	0	4	1	1	1	1	2	0	0	0	2	66206	2758	3	0	0	0
102204	18815	18397	14	19	neg	neg	36.8	0	0	0	0	0	1	2	3	1	0	4	1	1	1	1	2	0	0	0	2	66206	2758	3	0	0	0
102204	18845	18397	15	19	neg	neg	37.1	0	0	0	0	0	1	2	3	1	0	4	1	1	1	1	2	0	0	0	2	66206	2758	3	0	0	0
102204	18875	18397	16	19	neg	neg	37.1	0	0	0	0	0	1	2	3	1	0	4	1	1	1	1	2	0	0	0	2	66206	2758	3	0	0	0
102204	18905	18397	17	19	neg	neg	36.9	0	0	0	0	0	1	2	3	1	0	4	1	1	1	1	2	0	0	0	2	66206	2758	3	0	0	0
102204	18935	18397	18	19	neg	neg	36.8	0	0	0	0	0	1	2	3	1	0	4	1	1	1	1	2	0	0	0	2	66206	2758	3	0	0	0
102204	18965	18397	19	19	neg	neg	36.7	0	0	0	0	0	1	2	3	1	0	4	1	1	1	1	2	0	0	0	2	66206	2758	3	0	0	0
102301	18198	18170	1	24	neg	neg	36.7	0	0	0	0		1	1	30	1	5	1	1	4	2	1	1	0	0	0	1	4840	0	2	0	0	0
102301	18228	18170	2	24	neg	neg	37.2	0	0	0	0	1	1	1	30	1	5	1	1	4	2	1	1	0	0	0	1	4840	0	2	0	0	0
102301	18258	18170	3	24	v	v	36.7	0	0	5760	200	1	1	1	30	1	5	1	1	4	2	1	1	1	1	0	1	4840	0	2	0	0	0
102301	18288	18170	4	24	neg	neg	36.7	0	0	0	0	0	1	1	30	1	5	1	1	4	2	1	1	0	0	0	1	4840	0	2	0	0	0
102301	18318	18170	5	24	neg	neg	37.1	0	0	0	0	0	1	1	30	1	5	1	1	4	2	1	1	0	0	0	1	4840	0	2	0	0	0
102301	18348	18170	6	24	neg	neg	36.5	0	0	0	0	0	1	1	30	1	5	1	1	4	2	1	1	0	0	0	1	4840	0	2	0	0	0
102301	18378	18170	7	24	neg	neg	36.8	0	0	0	0	0	1	1	30	1	5	1	1	4	2	1	1	0	0	0	1	4840	0	2	0	0	0
102301	18408	18170	8	24	neg	neg	36.5	0	0	0	0	0	1	1	30	1	5	1	1	4	2	1	1	0	0	0	1	4840	0	2	0	0	0
102301	18438	18170	9	24	f	f	38	332	0	0	0	0	1	1	30	1	5	1	1	4	2	1	1	0	0	0	1	4840	0	2	0	0	1
102301	18468	18170	10	24	neg	neg	36.9	0	0	0	0	0	1	1	30	1	5	1	1	4	2	1	1	0	0	0	1	4840	0	2	0	0	0
102301	18498	18170	11	24	v	v	37	0	0	97	221	0	1	1	30	1	5	1	1	4	2	1	1	1	1	0	1	4840	0	2	0	0	0
102301	18528	18170	12	24	neg	neg	36.9	0	0	0	0	0	1	1	30	1	5	1	1	4	2	1	1	0	0	0	1	4840	0	2	0	0	0
102301	18558	18170	13	24	neg	neg	37	0	0	0	0	0	1	1	30	1	5	1	1	4	2	1	1	0	0	0	1	4840	0	2	0	0	0
102301	18588	18170	14	24	neg	neg	36.9	0	0	0	0	0	1	1	30	1	5	1	1	4	2	1	1	0	0	0	1	4840	0	2	0	0	0
102301	18618	18170	15	24	v	v	36.8	0	0	2680	400	0	1	1	30	1	5	1	1	4	2	1	1	1	1	0	1	4840	0	2	0	0	0
102301	18648	18170	16	24	neg	neg	36.7	0	0	0	0	0	1	1	30	1	5	1	1	4	2	1	1	0	0	0	1	4840	0	2	0	0	0
102301	18678	18170	17	24	neg	neg	36.9	0	0	0	0	0	1	1	30	1	5	1	1	4	2	1	1	0	0	0	1	4840	0	2	0	0	0
102301	18708	18170	18	24	neg	v	36.5	0	0	0	0	0	1	1	30	1	5	1	1	4	2	1	1	0	1	0	1	4840	0	2	0	0	0
102301	18738	18170	19	24	neg	neg	36.8	0	0	0	0	0	1	1	30	1	5	1	1	4	2	1	1	0	0	0	1	4840	0	2	0	0	0
102301	18768	18170	20	24	neg	neg	36.6	0	0	0	0	0	1	1	30	1	5	1	1	4	2	1	1	0	0	0	1	4840	0	2	0	0	0
102301	18798	18170	21	24	neg	neg	37.2	0	0	0	0	0	1	1	30	1	5	1	1	4	2	1	1	0	0	0	1	4840	0	2	0	0	0
102301	18828	18170	22	24	neg	neg	36.8	0	0	0	0	0	1	1	30	1	5	1	1	4	2	1	1	0	0	0	1	4840	0	2	0	0	0
102301	18858	18170	23	24	neg	neg	36.9	0	0	0	0	0	1	1	30	1	5	1	1	4	2	1	1	0	0	0	1	4840	0	2	0	0	0
102301	18888	18170	24	24	neg	neg	37	0	0	0	0	0	1	1	30	1	5	1	1	4	2	1	1	0	0	0	1	4840	0	2	0	0	0
102304	18097	18069	1	24	neg	neg	39.5	0	0	0	0		1	1	3	1	0	0	1	1	1	1	2	0	0	0	1	5080	640	3	0	0	0
102304	18127	18069	2	24	neg	neg	36.8	0	0	0	0	0	1	1	3	1	0	0	1	1	1	1	2	0	0	0	1	5080	640	3	0	0	0
102304	18157	18069	3	24	neg	neg	36.5	0	0	0	0	0	1	1	3	1	0	0	1	1	1	1	2	0	0	0	1	5080	640	3	0	0	0
102304	18187	18069	4	24	neg	neg	36.5	0	0	0	0	0	1	1	3	1	0	0	1	1	1	1	2	0	0	0	1	5080	640	3	0	0	0
102304	18217	18069	5	24	neg	neg	36.5	0	0	0	0	0	1	1	3	1	0	0	1	1	1	1	2	0	0	0	1	5080	640	3	0	0	0
102304	18247	18069	6	24	neg	neg	37.1	0	0	0	0	0	1	1	3	1	0	0	1	1	1	1	2	0	0	0	1	5080	640	3	0	0	0
102304	18277	18069	7	24	neg	neg	36.6	0	0	0	0	0	1	1	3	1	0	0	1	1	1	1	2	0	0	0	1	5080	640	3	0	0	0
102304	18307	18069	8	24	neg	neg	36.5	0	0	0	0	0	1	1	3	1	0	0	1	1	1	1	2	0	0	0	1	5080	640	3	0	0	0
102304	18337	18069	9	24	neg	neg	36.5	0	0	0	0	0	1	1	3	1	0	0	1	1	1	1	2	0	0	0	1	5080	640	3	0	0	0
102304	18367	18069	10	24	neg	neg	37.1	0	0	0	0	0	1	1	3	1	0	0	1	1	1	1	2	0	0	0	1	5080	640	3	0	0	0
102304	18394	18069	11	24	v	v	36.7	0	0	2840	640	0	1	1	3	1	0	0	1	1	1	1	2	1	1	0	1	5080	640	3	0	0	0
102304	18422	18069	12	24	f	f	40	38095	0	0	0	1	1	1	3	1	0	0	1	1	1	1	2	0	0	0	1	5080	640	3	0	0	1
102304	18457	18069	13	24	neg	neg	36.9	0	0	0	0	0	1	1	3	1	0	0	1	1	1	1	2	0	0	0	1	5080	640	3	0	0	0
102304	18469	18069	14	24	v	v	37.7	0	0	6440	920	1	1	1	3	1	0	0	1	1	1	1	2	1	1	1	1	5080	640	3	0	0	0
102304	18517	18069	15	24	neg	neg	37	0	0	0	0	0	1	1	3	1	0	0	1	1	1	1	2	0	0	0	1	5080	640	3	0	0	0
102304	18547	18069	16	24	v	v	37	0	0	123	56	1	1	1	3	1	0	0	1	1	1	1	2	1	1	0	1	5080	640	3	0	0	0
102304	18576	18069	17	24	neg	neg	36.5	0	0	0	0	0	1	1	3	1	0	0	1	1	1	1	2	0	0	0	1	5080	640	3	0	0	0
102304	18607	18069	18	24	v	v	37	0	0	1520	80	0	1	1	3	1	0	0	1	1	1	1	2	1	1	0	1	5080	640	3	0	0	0
102304	18637	18069	19	24	neg	neg	37.4	0	0	0	0	0	1	1	3	1	0	0	1	1	1	1	2	0	0	0	1	5080	640	3	0	0	0
102304	18667	18069	20	24	neg	v	36.6	0	0	0	0	0	1	1	3	1	0	0	1	1	1	1	2	0	1	0	1	5080	640	3	0	0	0
102304	18697	18069	21	24	neg	v	37	0	0	0	0	0	1	1	3	1	0	0	1	1	1	1	2	0	1	0	1	5080	640	3	0	0	0
102304	18727	18069	22	24	neg	neg	36.5	0	0	0	0	0	1	1	3	1	0	0	1	1	1	1	2	0	0	0	1	5080	640	3	0	0	0
102304	18757	18069	23	24	neg	neg	36.8	0	0	0	0	0	1	1	3	1	0	0	1	1	1	1	2	0	0	0	1	5080	640	3	0	0	0
102304	18787	18069	24	24	v	v	36.9	0	0	720	0	0	1	1	3	1	0	0	1	1	1	1	2	1	1	0	1	5080	640	3	0	0	0
102503	18131	18103	1	24	neg	neg	36.8	0	0	0	0		1	2	20	1	9	1	1	3	3	2	2	0	0	0	1	3400	200	2	0	0	0
102503	18161	18103	2	24	neg	neg	36.5	0	0	0	0	0	1	2	20	1	9	1	1	3	3	2	2	0	0	0	1	3400	200	2	0	0	0
102503	18191	18103	3	24	neg	neg	36.6	0	0	0	0	0	1	2	20	1	9	1	1	3	3	2	2	0	0	0	1	3400	200	2	0	0	0
102503	18221	18103	4	24	neg	neg	36.5	0	0	0	0	0	1	2	20	1	9	1	1	3	3	2	2	0	0	0	1	3400	200	2	0	0	0
102503	18251	18103	5	24	neg	neg	36.8	0	0	0	0	0	1	2	20	1	9	1	1	3	3	2	2	0	0	0	1	3400	200	2	0	0	0
102503	18311	18103	7	24	neg	neg	37	0	0	0	0	0	1	2	20	1	9	1	1	3	3	2	2	0	0	0	1	3400	200	2	0	0	0
102503	18336	18103	8	24	neg	neg	36.5	0	0	0	0	1	1	2	20	1	9	1	1	3	3	2	2	0	0	0	1	3400	200	2	0	0	0
102503	18371	18103	9	24	neg	neg	37	0	0	0	0	0	1	2	20	1	9	1	1	3	3	2	2	0	0	0	1	3400	200	2	0	0	0
102503	18401	18103	10	24	neg	neg	36.7	0	0	0	0	0	1	2	20	1	9	1	1	3	3	2	2	0	0	0	1	3400	200	2	0	0	0
102503	18431	18103	11	24	neg	neg	36.8	0	0	0	0	0	1	2	20	1	9	1	1	3	3	2	2	0	0	0	1	3400	200	2	0	0	0
102503	18461	18103	12	24	neg	neg	36.8	0	0	0	0	0	1	2	20	1	9	1	1	3	3	2	2	0	0	0	1	3400	200	2	0	0	0
102503	18491	18103	13	24	neg	neg	36.5	0	0	0	0	0	1	2	20	1	9	1	1	3	3	2	2	0	0	0	1	3400	200	2	0	0	0
102503	18521	18103	14	24	neg	neg	36.8	0	0	0	0	0	1	2	20	1	9	1	1	3	3	2	2	0	0	0	1	3400	200	2	0	0	0
102503	18551	18103	15	24	neg	neg	36.9	0	0	0	0	0	1	2	20	1	9	1	1	3	3	2	2	0	0	0	1	3400	200	2	0	0	0
102503	18581	18103	16	24	neg	neg	36.5	0	0	0	0	0	1	2	20	1	9	1	1	3	3	2	2	0	0	0	1	3400	200	2	0	0	0
102503	18611	18103	17	24	neg	neg	36.8	0	0	0	0	0	1	2	20	1	9	1	1	3	3	2	2	0	0	0	1	3400	200	2	0	0	0
102503	18641	18103	18	24	neg	neg	37	0	0	0	0	0	1	2	20	1	9	1	1	3	3	2	2	0	0	0	1	3400	200	2	0	0	0
102503	18671	18103	19	24	neg	neg	36.6	0	0	0	0	0	1	2	20	1	9	1	1	3	3	2	2	0	0	0	1	3400	200	2	0	0	0
102503	18701	18103	20	24	neg	neg	36.6	0	0	0	0	0	1	2	20	1	9	1	1	3	3	2	2	0	0	0	1	3400	200	2	0	0	0
102503	18731	18103	21	24	neg	neg	37.2	0	0	0	0	0	1	2	20	1	9	1	1	3	3	2	2	0	0	0	1	3400	200	2	0	0	0
102503	18761	18103	22	24	neg	neg	36.9	0	0	0	0	0	1	2	20	1	9	1	1	3	3	2	2	0	0	0	1	3400	200	2	0	0	0
102503	18791	18103	23	24	neg	neg	36.8	0	0	0	0	0	1	2	20	1	9	1	1	3	3	2	2	0	0	0	1	3400	200	2	0	0	0
102503	18821	18103	24	24	neg	neg	37	0	0	0	0	0	1	2	20	1	9	1	1	3	3	2	2	0	0	0	1	3400	200	2	0	0	0
102504	18437	18409	1	19	neg	neg	37.3	0	0	0	0		1	2	18	1	11	1	1	2	3	2	2	0	0	0	2	6480	160	3	0	0	0
102504	18467	18409	2	19	neg	neg	37.3	0	0	0	0	0	1	2	18	1	11	1	1	2	3	2	2	0	0	0	2	6480	160	3	0	0	0
102504	18497	18409	3	19	neg	neg	37	0	0	0	0	0	1	2	18	1	11	1	1	2	3	2	2	0	0	0	2	6480	160	3	0	0	0
102504	18527	18409	4	19	neg	neg	36.6	0	0	0	0	0	1	2	18	1	11	1	1	2	3	2	2	0	0	0	2	6480	160	3	0	0	0
102504	18557	18409	5	19	neg	neg	37	0	0	0	0	0	1	2	18	1	11	1	1	2	3	2	2	0	0	0	2	6480	160	3	0	0	0
102504	18587	18409	6	19	neg	neg	36.8	0	0	0	0	0	1	2	18	1	11	1	1	2	3	2	2	0	0	0	2	6480	160	3	0	0	0
102504	18617	18409	7	19	neg	neg	37.1	0	0	0	0	0	1	2	18	1	11	1	1	2	3	2	2	0	0	0	2	6480	160	3	0	0	0
102504	18647	18409	8	19	neg	neg	36.8	0	0	0	0	0	1	2	18	1	11	1	1	2	3	2	2	0	0	0	2	6480	160	3	0	0	0
102504	18677	18409	9	19	neg	neg	36.6	0	0	0	0	0	1	2	18	1	11	1	1	2	3	2	2	0	0	0	2	6480	160	3	0	0	0
102504	18707	18409	10	19	neg	neg	36.6	0	0	0	0	0	1	2	18	1	11	1	1	2	3	2	2	0	0	0	2	6480	160	3	0	0	0
102504	18737	18409	11	19	neg	neg	36.9	0	0	0	0	0	1	2	18	1	11	1	1	2	3	2	2	0	0	0	2	6480	160	3	0	0	0
102504	18767	18409	12	19	neg	f	36.8	0	0	0	0	0	1	2	18	1	11	1	1	2	3	2	2	0	0	0	2	6480	160	3	0	0	0
102504	18797	18409	13	19	neg	neg	37.1	0	0	0	0	0	1	2	18	1	11	1	1	2	3	2	2	0	0	0	2	6480	160	3	0	0	0
102504	18827	18409	14	19	neg	neg	36.9	0	0	0	0	0	1	2	18	1	11	1	1	2	3	2	2	0	0	0	2	6480	160	3	0	0	0
102504	18857	18409	15	19	neg	neg	36.6	0	0	0	0	0	1	2	18	1	11	1	1	2	3	2	2	0	0	0	2	6480	160	3	0	0	0
102504	18887	18409	16	19	neg	neg	37	0	0	0	0	0	1	2	18	1	11	1	1	2	3	2	2	0	0	0	2	6480	160	3	0	0	0
102504	18917	18409	17	19	neg	neg	36.8	0	0	0	0	0	1	2	18	1	11	1	1	2	3	2	2	0	0	0	2	6480	160	3	0	0	0
102504	18947	18409	18	19	neg	neg	36.8	0	0	0	0	0	1	2	18	1	11	1	1	2	3	2	2	0	0	0	2	6480	160	3	0	0	0
102504	18977	18409	19	19	neg	neg	36.7	0	0	0	0	0	1	2	18	1	11	1	1	2	3	2	2	0	0	0	2	6480	160	3	0	0	0
102803	18295	18267	1	24	neg	neg	36.5	0	0	0	0		1	2	6	1	1	4	3	1	2	2	1	0	0	0	2	31920	280	3	0	0	0
102803	18323	18267	2	24	neg	neg	36.5	0	0	0	0	0	1	2	6	1	1	4	3	1	2	2	1	0	0	0	2	31920	280	3	0	0	0
102803	18357	18267	3	24	neg	neg	37	0	0	0	0	0	1	2	6	1	1	4	3	1	2	2	1	0	0	0	2	31920	280	3	0	0	0
102803	18381	18267	4	24	f	f	38.8	11360	0	0	0	1	1	2	6	1	1	4	3	1	2	2	1	0	0	0	2	31920	280	3	0	0	1
102803	18417	18267	5	24	neg	neg	36.9	0	0	0	0	0	1	2	6	1	1	4	3	1	2	2	1	0	0	0	2	31920	280	3	0	0	0
102803	18447	18267	6	24	neg	neg	37	0	0	0	0	0	1	2	6	1	1	4	3	1	2	2	1	0	0	0	2	31920	280	3	0	0	0
102803	18446	18267	7	24	neg	neg	36.6	0	0	0	0	0	1	2	6	1	1	4	3	1	2	2	1	0	0	0	2	31920	280	3	0	0	0
102803	18507	18267	8	24	neg	neg	37.2	0	0	0	0	0	1	2	6	1	1	4	3	1	2	2	1	0	0	0	2	31920	280	3	0	0	0
102803	18535	18267	9	24	neg	neg	37	0	0	0	0	0	1	2	6	1	1	4	3	1	2	2	1	0	0	0	2	31920	280	3	0	0	0
102803	18565	18267	10	24	neg	neg	37	0	0	0	0	0	1	2	6	1	1	4	3	1	2	2	1	0	0	0	2	31920	280	3	0	0	0
102803	18595	18267	11	24	neg	neg	36.8	0	0	0	0	0	1	2	6	1	1	4	3	1	2	2	1	0	0	0	2	31920	280	3	0	0	0
102803	18625	18267	12	24	neg	neg	37	0	0	0	0	0	1	2	6	1	1	4	3	1	2	2	1	0	0	0	2	31920	280	3	0	0	0
102803	18655	18267	13	24	neg	neg	37.3	0	0	0	0	0	1	2	6	1	1	4	3	1	2	2	1	0	0	0	2	31920	280	3	0	0	0
102803	18685	18267	14	24	neg	neg	36.6	0	0	0	0	0	1	2	6	1	1	4	3	1	2	2	1	0	0	0	2	31920	280	3	0	0	0
102803	18715	18267	15	24	neg	neg	36.7	0	0	0	0	0	1	2	6	1	1	4	3	1	2	2	1	0	0	0	2	31920	280	3	0	0	0
102803	18745	18267	16	24	neg	neg	36.7	0	0	0	0	0	1	2	6	1	1	4	3	1	2	2	1	0	0	0	2	31920	280	3	0	0	0
102803	18775	18267	17	24	neg	neg	36.8	0	0	0	0	0	1	2	6	1	1	4	3	1	2	2	1	0	0	0	2	31920	280	3	0	0	0
102803	18805	18267	18	24	neg	neg	36.8	0	0	0	0	0	1	2	6	1	1	4	3	1	2	2	1	0	0	0	2	31920	280	3	0	0	0
102803	18835	18267	19	24	neg	neg	36.8	0	0	0	0	0	1	2	6	1	1	4	3	1	2	2	1	0	0	0	2	31920	280	3	0	0	0
102803	18865	18267	20	24	neg	neg	37	0	0	0	0	0	1	2	6	1	1	4	3	1	2	2	1	0	0	0	2	31920	280	3	0	0	0
102803	18895	18267	21	24	neg	neg	36.8	0	0	0	0	0	1	2	6	1	1	4	3	1	2	2	1	0	0	0	2	31920	280	3	0	0	0
102803	18925	18267	22	24	neg	neg	36.8	0	0	0	0	0	1	2	6	1	1	4	3	1	2	2	1	0	0	0	2	31920	280	3	0	0	0
102803	18955	18267	23	24	neg	neg	37	0	0	0	0	0	1	2	6	1	1	4	3	1	2	2	1	0	0	0	2	31920	280	3	0	0	0
102803	18985	18267	24	24	neg	neg	36.6	0	0	0	0	0	1	2	6	1	1	4	3	1	2	2	1	0	0	0	2	31920	280	3	0	0	0
103003	18487	18459	1	17	neg	neg	37.4	0	0	0	0		1	2	9	1	1	4	3	1	2	1	2	0	0	0	2	16853	996	3	0	0	0
103003	18517	18459	2	17	neg	neg	37.2	0	0	0	0	0	1	2	9	1	1	4	3	1	2	1	2	0	0	0	2	16853	996	3	0	0	0
103003	18547	18459	3	17	neg	neg	36.8	0	0	0	0	0	1	2	9	1	1	4	3	1	2	1	2	0	0	0	2	16853	996	3	0	0	0
103003	18577	18459	4	17	neg	neg	37	0	0	0	0	0	1	2	9	1	1	4	3	1	2	1	2	0	0	0	2	16853	996	3	0	0	0
103003	18607	18459	5	17	neg	v	36.8	0	0	0	0	0	1	2	9	1	1	4	3	1	2	1	2	0	1	0	2	16853	996	3	0	0	0
103003	18637	18459	6	17	neg	v	37.1	0	0	0	0	0	1	2	9	1	1	4	3	1	2	1	2	0	1	0	2	16853	996	3	0	0	0
103003	18667	18459	7	17	neg	neg	36.6	0	0	0	0	0	1	2	9	1	1	4	3	1	2	1	2	0	0	0	2	16853	996	3	0	0	0
103003	18697	18459	8	17	neg	neg	36.6	0	0	0	0	0	1	2	9	1	1	4	3	1	2	1	2	0	0	0	2	16853	996	3	0	0	0
103003	18727	18459	9	17	neg	neg	36.6	0	0	0	0	0	1	2	9	1	1	4	3	1	2	1	2	0	0	0	2	16853	996	3	0	0	0
103003	18757	18459	10	17	neg	neg	36.8	0	0	0	0	0	1	2	9	1	1	4	3	1	2	1	2	0	0	0	2	16853	996	3	0	0	0
103003	18787	18459	11	17	neg	neg	36.8	0	0	0	0	0	1	2	9	1	1	4	3	1	2	1	2	0	0	0	2	16853	996	3	0	0	0
103003	18817	18459	12	17	neg	neg	37.1	0	0	0	0	0	1	2	9	1	1	4	3	1	2	1	2	0	0	0	2	16853	996	3	0	0	0
103003	18847	18459	13	17	neg	neg	36.6	0	0	0	0	0	1	2	9	1	1	4	3	1	2	1	2	0	0	0	2	16853	996	3	0	0	0
103003	18877	18459	14	17	neg	neg	36.7	0	0	0	0	0	1	2	9	1	1	4	3	1	2	1	2	0	0	0	2	16853	996	3	0	0	0
103003	18907	18459	15	17	neg	neg	36.6	0	0	0	0	0	1	2	9	1	1	4	3	1	2	1	2	0	0	0	2	16853	996	3	0	0	0
103003	18937	18459	16	17	neg	neg	36.8	0	0	0	0	0	1	2	9	1	1	4	3	1	2	1	2	0	0	0	2	16853	996	3	0	0	0
103003	18967	18459	17	17	neg	neg	37	0	0	0	0	0	1	2	9	1	1	4	3	1	2	1	2	0	0	0	2	16853	996	3	0	0	0
103101	18236	18208	1	24	neg	neg	36.5	0	0	0	0		1	1	29	1	5	1	1	3	2	2	1	0	0	0	1	9800	280	3	0	0	0
103101	18266	18208	2	24	neg	neg	36.6	0	0	0	0	0	1	1	29	1	5	1	1	3	2	2	1	0	0	0	1	9800	280	3	0	0	0
103101	18296	18208	3	24	neg	neg	36.8	0	0	0	0	0	1	1	29	1	5	1	1	3	2	2	1	0	0	0	1	9800	280	3	0	0	0
103101	18325	18208	4	24	neg	neg	36.5	0	0	0	0	0	1	1	29	1	5	1	1	3	2	2	1	0	0	0	1	9800	280	3	0	0	0
103101	18356	18208	5	24	neg	neg	36.5	0	0	0	0	0	1	1	29	1	5	1	1	3	2	2	1	0	0	0	1	9800	280	3	0	0	0
103101	18386	18208	6	24	neg	neg	36.8	0	0	0	0	0	1	1	29	1	5	1	1	3	2	2	1	0	0	0	1	9800	280	3	0	0	0
103101	18416	18208	7	24	neg	neg	36.5	0	0	0	0	0	1	1	29	1	5	1	1	3	2	2	1	0	0	0	1	9800	280	3	0	0	0
103101	18430	18208	8	24	v	v	36.5	0	0	13160	3340	1	1	1	29	1	5	1	1	3	2	2	1	1	1	0	1	9800	280	3	0	0	0
103101	18476	18208	9	24	neg	neg	37.1	0	0	0	0	0	1	1	29	1	5	1	1	3	2	2	1	0	0	0	1	9800	280	3	0	0	0
103101	18506	18208	10	24	neg	neg	36.5	0	0	0	0	0	1	1	29	1	5	1	1	3	2	2	1	0	0	0	1	9800	280	3	0	0	0
103101	18536	18208	11	24	neg	neg	36.7	0	0	0	0	0	1	1	29	1	5	1	1	3	2	2	1	0	0	0	1	9800	280	3	0	0	0
103101	18541	18208	12	24	v	v	38	0	0	3921	3254	1	1	1	29	1	5	1	1	3	2	2	1	1	1	1	1	9800	280	3	0	0	0
103101	18596	18208	13	24	neg	v	37	0	0	0	0	0	1	1	29	1	5	1	1	3	2	2	1	0	1	0	1	9800	280	3	0	1	0
103101	18626	18208	14	24	neg	v	37	0	0	0	0	0	1	1	29	1	5	1	1	3	2	2	1	0	1	0	1	9800	280	3	0	0	0
103101	18656	18208	15	24	neg	v	36.7	0	0	0	0	0	1	1	29	1	5	1	1	3	2	2	1	0	1	0	1	9800	280	3	0	0	0
103101	18686	18208	16	24	neg	v	36.5	0	0	0	0	0	1	1	29	1	5	1	1	3	2	2	1	0	1	0	1	9800	280	3	0	0	0
103101	18716	18208	17	24	neg	v	36.7	0	0	0	0	0	1	1	29	1	5	1	1	3	2	2	1	0	1	0	1	9800	280	3	0	0	0
103101	18746	18208	18	24	neg	v	36.7	0	0	0	0	0	1	1	29	1	5	1	1	3	2	2	1	0	1	0	1	9800	280	3	0	0	0
103101	18776	18208	19	24	neg	v	36.7	0	0	0	0	0	1	1	29	1	5	1	1	3	2	2	1	0	1	0	1	9800	280	3	0	0	0
103101	18806	18208	20	24	neg	neg	37	0	0	0	0	0	1	1	29	1	5	1	1	3	2	2	1	0	0	0	1	9800	280	3	0	0	0
103101	18836	18208	21	24	neg	v	37	0	0	0	0	0	1	1	29	1	5	1	1	3	2	2	1	0	1	0	1	9800	280	3	0	0	0
103101	18866	18208	22	24	neg	neg	36.7	0	0	0	0	0	1	1	29	1	5	1	1	3	2	2	1	0	0	0	1	9800	280	3	0	0	0
103101	18896	18208	23	24	neg	neg	37	0	0	0	0	0	1	1	29	1	5	1	1	3	2	2	1	0	0	0	1	9800	280	3	0	0	0
103101	18926	18208	24	24	neg	v	37	0	0	0	0	0	1	1	29	1	5	1	1	3	2	2	1	0	1	0	1	9800	280	3	0	0	0
103201	18347	18319	1	22	neg	neg	36.9	0	0	0	0		1	1	36	1	0	1	1	4	1	1	2	0	0	0	2	5880	840	3	0	0	0
103201	18377	18319	2	22	neg	neg	36.5	0	0	0	0	0	1	1	36	1	0	1	1	4	1	1	2	0	0	0	2	5880	840	3	0	0	0
103201	18407	18319	3	22	neg	neg	36.5	0	0	0	0	0	1	1	36	1	0	1	1	4	1	1	2	0	0	0	2	5880	840	3	0	0	0
103201	18437	18319	4	22	neg	neg	37	0	0	0	0	0	1	1	36	1	0	1	1	4	1	1	2	0	0	0	2	5880	840	3	0	0	0
103201	18467	18319	5	22	neg	neg	36.7	0	0	0	0	0	1	1	36	1	0	1	1	4	1	1	2	0	0	0	2	5880	840	3	0	0	0
103201	18497	18319	6	22	neg	f	37	0	0	0	0	0	1	1	36	1	0	1	1	4	1	1	2	0	0	0	2	5880	840	3	0	0	0
103201	18557	18319	8	22	neg	neg	37	0	0	0	0	0	1	1	36	1	0	1	1	4	1	1	2	0	0	0	2	5880	840	3	0	0	0
103201	18587	18319	9	22	neg	neg	37	0	0	0	0	0	1	1	36	1	0	1	1	4	1	1	2	0	0	0	2	5880	840	3	0	0	0
103201	18617	18319	10	22	v	v	37.3	0	0	1880	400	0	1	1	36	1	0	1	1	4	1	1	2	1	1	0	2	5880	840	3	0	0	0
103201	18647	18319	11	22	neg	neg	36.7	0	0	0	0	0	1	1	36	1	0	1	1	4	1	1	2	0	0	0	2	5880	840	3	0	0	0
103201	18677	18319	12	22	neg	neg	36.6	0	0	0	0	0	1	1	36	1	0	1	1	4	1	1	2	0	0	0	2	5880	840	3	0	0	0
103201	18707	18319	13	22	neg	neg	36.6	0	0	0	0	0	1	1	36	1	0	1	1	4	1	1	2	0	0	0	2	5880	840	3	0	0	0
103201	18737	18319	14	22	neg	neg	36.8	0	0	0	0	0	1	1	36	1	0	1	1	4	1	1	2	0	0	0	2	5880	840	3	0	0	0
103201	18767	18319	15	22	neg	neg	36.8	0	0	0	0	0	1	1	36	1	0	1	1	4	1	1	2	0	0	0	2	5880	840	3	0	0	0
103201	18797	18319	16	22	neg	neg	36.8	0	0	0	0	0	1	1	36	1	0	1	1	4	1	1	2	0	0	0	2	5880	840	3	0	0	0
103201	18827	18319	17	22	neg	neg	36.8	0	0	0	0	0	1	1	36	1	0	1	1	4	1	1	2	0	0	0	2	5880	840	3	0	0	0
103201	18857	18319	18	22	neg	neg	36.6	0	0	0	0	0	1	1	36	1	0	1	1	4	1	1	2	0	0	0	2	5880	840	3	0	0	0
103201	18887	18319	19	22	neg	neg	36.9	0	0	0	0	0	1	1	36	1	0	1	1	4	1	1	2	0	0	0	2	5880	840	3	0	0	0
103201	18917	18319	20	22	neg	neg	37	0	0	0	0	0	1	1	36	1	0	1	1	4	1	1	2	0	0	0	2	5880	840	3	0	0	0
103201	18947	18319	21	22	neg	neg	36.5	0	0	0	0	0	1	1	36	1	0	1	1	4	1	1	2	0	0	0	2	5880	840	3	0	0	0
103201	18977	18319	22	22	neg	neg	37	0	0	0	0	0	1	1	36	1	0	1	1	4	1	1	2	0	0	0	2	5880	840	3	0	0	0
103205	18644	18616	1	12	neg	neg	36.7	0	0	0	0		1	1	6	1	0	0	1	1	1	1	1	0	0	0	2	9720	760	3	0	0	0
103205	18674	18616	2	12	neg	neg	36.6	0	0	0	0	0	1	1	6	1	0	0	1	1	1	1	1	0	0	0	2	9720	760	3	0	0	0
103205	18704	18616	3	12	neg	neg	36.6	0	0	0	0	0	1	1	6	1	0	0	1	1	1	1	1	0	0	0	2	9720	760	3	0	0	0
103205	18734	18616	4	12	neg	neg	37.1	0	0	0	0	0	1	1	6	1	0	0	1	1	1	1	1	0	0	0	2	9720	760	3	0	0	0
103205	18764	18616	5	12	neg	neg	36.9	0	0	0	0	0	1	1	6	1	0	0	1	1	1	1	1	0	0	0	2	9720	760	3	0	0	0
103205	18794	18616	6	12	neg	neg	37	0	0	0	0	0	1	1	6	1	0	0	1	1	1	1	1	0	0	0	2	9720	760	3	0	0	0
103205	18824	18616	7	12	neg	neg	36.8	0	0	0	0	0	1	1	6	1	0	0	1	1	1	1	1	0	0	0	2	9720	760	3	0	0	0
103205	18854	18616	8	12	neg	neg	36.7	0	0	0	0	0	1	1	6	1	0	0	1	1	1	1	1	0	0	0	2	9720	760	3	0	0	0
103205	18884	18616	9	12	neg	neg	36.8	0	0	0	0	0	1	1	6	1	0	0	1	1	1	1	1	0	0	0	2	9720	760	3	0	0	0
103205	18914	18616	10	12	neg	neg	36.8	0	0	0	0	0	1	1	6	1	0	0	1	1	1	1	1	0	0	0	2	9720	760	3	0	0	0
103205	18944	18616	11	12	neg	neg	36.8	0	0	0	0	0	1	1	6	1	0	0	1	1	1	1	1	0	0	0	2	9720	760	3	0	0	0
103205	18974	18616	12	12	neg	neg	36.6	0	0	0	0	0	1	1	6	1	0	0	1	1	1	1	1	0	0	0	2	9720	760	3	0	0	0
103206	18478	18450	1	18	neg	neg	37.3	0	0	0	0		1	2	4	1	0	0	1	1	1	1	2	0	0	0	2	35963	740	3	0	0	0
103206	18508	18450	2	18	neg	neg	39	0	0	0	0	1	1	2	4	1	0	0	1	1	1	1	2	0	0	0	2	35963	740	3	0	0	0
103206	18538	18450	3	18	v	v	38.6	0	0	2438	3276	1	1	2	4	1	0	0	1	1	1	1	2	1	1	1	2	35963	740	3	0	0	0
103206	18568	18450	4	18	neg	neg	37	0	0	0	0	0	1	2	4	1	0	0	1	1	1	1	2	0	0	0	2	35963	740	3	0	0	0
103206	18598	18450	5	18	v	v	37	0	0	2680	920	0	1	2	4	1	0	0	1	1	1	1	2	1	1	0	2	35963	740	3	0	0	0
103206	18628	18450	6	18	neg	f	37.5	0	0	0	0	0	1	2	4	1	0	0	1	1	1	1	2	0	0	0	2	35963	740	3	0	0	0
103206	18658	18450	7	18	neg	v	36.7	0	0	0	0	0	1	2	4	1	0	0	1	1	1	1	2	0	1	0	2	35963	740	3	1	0	0
103206	18688	18450	8	18	v	v	37.4	0	0	192	0	0	1	2	4	1	0	0	1	1	1	1	2	1	1	0	2	35963	740	3	0	0	0
103206	18718	18450	9	18	neg	v	36.6	0	0	0	0	0	1	2	4	1	0	0	1	1	1	1	2	0	1	0	2	35963	740	3	0	1	0
103206	18748	18450	10	18	v	v	36.7	0	0	280	40	0	1	2	4	1	0	0	1	1	1	1	2	1	1	0	2	35963	740	3	0	0	0
103206	18778	18450	11	18	neg	neg	36.7	0	0	0	0	0	1	2	4	1	0	0	1	1	1	1	2	0	0	0	2	35963	740	3	0	0	0
103206	18808	18450	12	18	neg	neg	37.1	0	0	0	0	0	1	2	4	1	0	0	1	1	1	1	2	0	0	0	2	35963	740	3	0	0	0
103206	18838	18450	13	18	neg	neg	37	0	0	0	0	0	1	2	4	1	0	0	1	1	1	1	2	0	0	0	2	35963	740	3	0	0	0
103206	18868	18450	14	18	neg	neg	36.7	0	0	0	0	0	1	2	4	1	0	0	1	1	1	1	2	0	0	0	2	35963	740	3	0	0	0
103206	18898	18450	15	18	neg	neg	37	0	0	0	0	0	1	2	4	1	0	0	1	1	1	1	2	0	0	0	2	35963	740	3	0	0	0
103206	18928	18450	16	18	neg	neg	36.9	0	0	0	0	0	1	2	4	1	0	0	1	1	1	1	2	0	0	0	2	35963	740	3	0	0	0
103206	18958	18450	17	18	neg	neg	36.6	0	0	0	0	0	1	2	4	1	0	0	1	1	1	1	2	0	0	0	2	35963	740	3	0	0	0
103206	18988	18450	18	18	neg	neg	37	0	0	0	0	0	1	2	4	1	0	0	1	1	1	1	2	0	0	0	2	35963	740	3	0	0	0
103301	18412	18384	1	20	neg	neg	36.7	0	0	0	0		1	1	29	1	3	1	1	3	2	1	2	0	0	0	2	480	160	1	0	0	0
103301	18442	18384	2	20	neg	neg	36.6	0	0	0	0	0	1	1	29	1	3	1	1	3	2	1	2	0	0	0	2	480	160	1	0	0	0
103301	18472	18384	3	20	neg	v	36.6	0	0	0	0	0	1	1	29	1	3	1	1	3	2	1	2	0	1	0	2	480	160	1	0	0	0
103301	18502	18384	4	20	neg	neg	37.8	0	0	0	0	1	1	1	29	1	3	1	1	3	2	1	2	0	0	0	2	480	160	1	0	0	0
103301	18532	18384	5	20	neg	neg	36.7	0	0	0	0	0	1	1	29	1	3	1	1	3	2	1	2	0	0	0	2	480	160	1	0	0	0
103301	18562	18384	6	20	neg	neg	37.3	0	0	0	0	0	1	1	29	1	3	1	1	3	2	1	2	0	0	0	2	480	160	1	0	0	0
103301	18592	18384	7	20	neg	neg	37.3	0	0	0	0	0	1	1	29	1	3	1	1	3	2	1	2	0	0	0	2	480	160	1	0	0	0
103301	18622	18384	8	20	neg	v	37.1	0	0	0	0	0	1	1	29	1	3	1	1	3	2	1	2	0	1	0	2	480	160	1	0	0	0
103301	18652	18384	9	20	neg	neg	36.8	0	0	0	0	0	1	1	29	1	3	1	1	3	2	1	2	0	0	0	2	480	160	1	0	0	0
103301	18682	18384	10	20	neg	neg	36.5	0	0	0	0	0	1	1	29	1	3	1	1	3	2	1	2	0	0	0	2	480	160	1	0	0	0
103301	18712	18384	11	20	neg	neg	36.7	0	0	0	0	0	1	1	29	1	3	1	1	3	2	1	2	0	0	0	2	480	160	1	0	0	0
103301	18742	18384	12	20	neg	neg	36.7	0	0	0	0	0	1	1	29	1	3	1	1	3	2	1	2	0	0	0	2	480	160	1	0	0	0
103301	18772	18384	13	20	neg	neg	36.7	0	0	0	0	0	1	1	29	1	3	1	1	3	2	1	2	0	0	0	2	480	160	1	0	0	0
103301	18802	18384	14	20	neg	neg	36.7	0	0	0	0	0	1	1	29	1	3	1	1	3	2	1	2	0	0	0	2	480	160	1	0	0	0
103301	18832	18384	15	20	neg	neg	37	0	0	0	0	0	1	1	29	1	3	1	1	3	2	1	2	0	0	0	2	480	160	1	0	0	0
103301	18862	18384	16	20	neg	neg	36.6	0	0	0	0	0	1	1	29	1	3	1	1	3	2	1	2	0	0	0	2	480	160	1	0	0	0
103301	18892	18384	17	20	neg	neg	37	0	0	0	0	0	1	1	29	1	3	1	1	3	2	1	2	0	0	0	2	480	160	1	0	0	0
103301	18922	18384	18	20	neg	neg	37	0	0	0	0	0	1	1	29	1	3	1	1	3	2	1	2	0	0	0	2	480	160	1	0	0	0
103301	18952	18384	19	20	neg	neg	37	0	0	0	0	0	1	1	29	1	3	1	1	3	2	1	2	0	0	0	2	480	160	1	0	0	0
103301	18982	18384	20	20	neg	neg	37	0	0	0	0	0	1	1	29	1	3	1	1	3	2	1	2	0	0	0	2	480	160	1	0	0	0
103303	18067	18040	1	24	neg	neg	37	0	0	0	0		1	1	6	1	0	0	1	1	1	1	2	0	0	0	1	280	16	1	0	0	0
103303	18098	18040	2	24	neg	neg	36.5	0	0	0	0	0	1	1	6	1	0	0	1	1	1	1	2	0	0	0	1	280	16	1	0	0	0
103303	18128	18040	3	24	f	f	36.8	128	0	0	0	0	1	1	6	1	0	0	1	1	1	1	2	0	0	0	1	280	16	1	0	0	1
103303	18158	18040	4	24	neg	neg	36.5	0	0	0	0	0	1	1	6	1	0	0	1	1	1	1	2	0	0	0	1	280	16	1	0	0	0
103303	18188	18040	5	24	neg	neg	36.6	0	0	0	0	0	1	1	6	1	0	0	1	1	1	1	2	0	0	0	1	280	16	1	0	0	0
103303	18218	18040	6	24	neg	v	36.5	0	0	0	0	0	1	1	6	1	0	0	1	1	1	1	2	0	1	0	1	280	16	1	0	0	0
103303	18248	18040	7	24	neg	neg	36.9	0	0	0	0	0	1	1	6	1	0	0	1	1	1	1	2	0	0	0	1	280	16	1	0	0	0
103303	18278	18040	8	24	neg	neg	36.7	0	0	0	0	0	1	1	6	1	0	0	1	1	1	1	2	0	0	0	1	280	16	1	0	0	0
103303	18308	18040	9	24	neg	neg	37	0	0	0	0	0	1	1	6	1	0	0	1	1	1	1	2	0	0	0	1	280	16	1	0	0	0
103303	18337	18040	10	24	neg	neg	37	0	0	0	0	0	1	1	6	1	0	0	1	1	1	1	2	0	0	0	1	280	16	1	0	0	0
103303	18368	18040	11	24	neg	neg	37.1	0	0	0	0	0	1	1	6	1	0	0	1	1	1	1	2	0	0	0	1	280	16	1	0	0	0
103303	18398	18040	12	24	neg	neg	36.8	0	0	0	0	0	1	1	6	1	0	0	1	1	1	1	2	0	0	0	1	280	16	1	0	0	0
103303	18428	18040	13	24	neg	v	37.3	0	0	0	0	0	1	1	6	1	0	0	1	1	1	1	2	0	1	0	1	280	16	1	0	0	0
103303	18434	18040	14	24	v	v	39	0	0	2185	307	1	1	1	6	1	0	0	1	1	1	1	2	1	1	1	1	280	16	1	0	0	0
103303	18488	18040	15	24	v	v	39.2	0	0	600	0	1	1	1	6	1	0	0	1	1	1	1	2	1	1	1	1	280	16	1	0	1	0
103303	18518	18040	16	24	neg	neg	36.5	0	0	0	0	1	1	1	6	1	0	0	1	1	1	1	2	0	0	0	1	280	16	1	0	0	0
103303	18534	18040	17	24	v	v	37.6	0	0	9440	320	1	1	1	6	1	0	0	1	1	1	1	2	1	1	1	1	280	16	1	0	0	0
103303	18578	18040	18	24	neg	neg	36.8	0	0	0	0	0	1	1	6	1	0	0	1	1	1	1	2	0	0	0	1	280	16	1	0	0	0
103303	18608	18040	19	24	v	v	37.1	0	0	2040	480	0	1	1	6	1	0	0	1	1	1	1	2	1	1	0	1	280	16	1	0	0	0
103303	18638	18040	20	24	neg	neg	36.8	0	0	0	0	0	1	1	6	1	0	0	1	1	1	1	2	0	0	0	1	280	16	1	0	0	0
103303	18668	18040	21	24	neg	neg	36.7	0	0	0	0	0	1	1	6	1	0	0	1	1	1	1	2	0	0	0	1	280	16	1	0	0	0
103303	18698	18040	22	24	v	v	36.9	0	0	128	0	0	1	1	6	1	0	0	1	1	1	1	2	1	1	0	1	280	16	1	0	0	0
103303	18728	18040	23	24	neg	neg	36.5	0	0	0	0	0	1	1	6	1	0	0	1	1	1	1	2	0	0	0	1	280	16	1	0	0	0
103303	18758	18040	24	24	neg	neg	36.9	0	0	0	0	0	1	1	6	1	0	0	1	1	1	1	2	0	0	0	1	280	16	1	0	0	0
103701	18060	18032	1	24	neg	neg	36.8	0	0	0	0		1	1	27	1	6	1	1	3	3	2	2	0	0	0	1	500	24	1	0	0	0
103701	18090	18032	2	24	f	f	38.9	35087	0	0	0	0	1	1	27	1	6	1	1	3	3	2	2	0	0	0	1	500	24	1	0	0	1
103701	18120	18032	3	24	neg	neg	36.8	0	0	0	0	0	1	1	27	1	6	1	1	3	3	2	2	0	0	0	1	500	24	1	0	0	0
103701	18150	18032	4	24	neg	neg	36.5	0	0	0	0	0	1	1	27	1	6	1	1	3	3	2	2	0	0	0	1	500	24	1	0	0	0
103701	18180	18032	5	24	neg	neg	36.5	0	0	0	0	0	1	1	27	1	6	1	1	3	3	2	2	0	0	0	1	500	24	1	0	0	0
103701	18211	18032	6	24	neg	neg	36.9	0	0	0	0	0	1	1	27	1	6	1	1	3	3	2	2	0	0	0	1	500	24	1	0	0	0
103701	18240	18032	7	24	neg	neg	36.5	0	0	0	0	0	1	1	27	1	6	1	1	3	3	2	2	0	0	0	1	500	24	1	0	0	0
103701	18270	18032	8	24	neg	neg	36.7	0	0	0	0	0	1	1	27	1	6	1	1	3	3	2	2	0	0	0	1	500	24	1	0	0	0
103701	18300	18032	9	24	neg	neg	36.8	0	0	0	0	0	1	1	27	1	6	1	1	3	3	2	2	0	0	0	1	500	24	1	0	0	0
103701	18330	18032	10	24	neg	neg	36.5	0	0	0	0	0	1	1	27	1	6	1	1	3	3	2	2	0	0	0	1	500	24	1	0	0	0
103701	18360	18032	11	24	neg	neg	36.7	0	0	0	0	0	1	1	27	1	6	1	1	3	3	2	2	0	0	0	1	500	24	1	0	0	0
103701	18390	18032	12	24	neg	neg	36.8	0	0	0	0	0	1	1	27	1	6	1	1	3	3	2	2	0	0	0	1	500	24	1	0	0	0
103701	18420	18032	13	24	neg	neg	36.5	0	0	0	0	0	1	1	27	1	6	1	1	3	3	2	2	0	0	0	1	500	24	1	0	0	0
103701	18450	18032	14	24	neg	neg	36.7	0	0	0	0	0	1	1	27	1	6	1	1	3	3	2	2	0	0	0	1	500	24	1	0	0	0
103701	18480	18032	15	24	neg	neg	37.1	0	0	0	0	0	1	1	27	1	6	1	1	3	3	2	2	0	0	0	1	500	24	1	0	0	0
103701	18510	18032	16	24	neg	neg	36.5	0	0	0	0	1	1	1	27	1	6	1	1	3	3	2	2	0	0	0	1	500	24	1	0	0	0
103701	18540	18032	17	24	neg	neg	37	0	0	0	0	0	1	1	27	1	6	1	1	3	3	2	2	0	0	0	1	500	24	1	0	0	0
103701	18570	18032	18	24	neg	neg	37	0	0	0	0	0	1	1	27	1	6	1	1	3	3	2	2	0	0	0	1	500	24	1	0	0	0
103701	18600	18032	19	24	neg	neg	36.8	0	0	0	0	0	1	1	27	1	6	1	1	3	3	2	2	0	0	0	1	500	24	1	0	0	0
103701	18630	18032	20	24	neg	neg	37	0	0	0	0	0	1	1	27	1	6	1	1	3	3	2	2	0	0	0	1	500	24	1	0	0	0
103701	18660	18032	21	24	neg	neg	36.7	0	0	0	0	1	1	1	27	1	6	1	1	3	3	2	2	0	0	0	1	500	24	1	0	0	0
103701	18690	18032	22	24	neg	neg	36.6	0	0	0	0	0	1	1	27	1	6	1	1	3	3	2	2	0	0	0	1	500	24	1	0	0	0
103701	18720	18032	23	24	neg	neg	36.5	0	0	0	0	0	1	1	27	1	6	1	1	3	3	2	2	0	0	0	1	500	24	1	0	0	0
103701	18750	18032	24	24	neg	neg	36.7	0	0	0	0	0	1	1	27	1	6	1	1	3	3	2	2	0	0	0	1	500	24	1	0	0	0
103702	18156	18128	1	24	neg	neg	36.5	0	0	0	0		1	2	24	1	6	1	1	3	3	2	1	0	0	0	1	2960	1120	2	0	0	0
103702	18186	18128	2	24	neg	neg	36.6	0	0	0	0	0	1	2	24	1	6	1	1	3	3	2	1	0	0	0	1	2960	1120	2	0	0	0
103702	18216	18128	3	24	neg	neg	36.5	0	0	0	0	0	1	2	24	1	6	1	1	3	3	2	1	0	0	0	1	2960	1120	2	0	0	0
103702	18246	18128	4	24	neg	neg	36.5	0	0	0	0	1	1	2	24	1	6	1	1	3	3	2	1	0	0	0	1	2960	1120	2	0	0	0
103702	18276	18128	5	24	neg	neg	36.6	0	0	0	0	0	1	2	24	1	6	1	1	3	3	2	1	0	0	0	1	2960	1120	2	0	0	0
103702	18306	18128	6	24	neg	neg	36.8	0	0	0	0	0	1	2	24	1	6	1	1	3	3	2	1	0	0	0	1	2960	1120	2	0	0	0
103702	18332	18128	7	24	neg	neg	36.5	0	0	0	0	0	1	2	24	1	6	1	1	3	3	2	1	0	0	0	1	2960	1120	2	0	0	0
103702	18366	18128	8	24	neg	neg	36.8	0	0	0	0	0	1	2	24	1	6	1	1	3	3	2	1	0	0	0	1	2960	1120	2	0	0	0
103702	18396	18128	9	24	neg	neg	36.5	0	0	0	0	0	1	2	24	1	6	1	1	3	3	2	1	0	0	0	1	2960	1120	2	0	0	0
103702	18413	18128	10	24	v	v	37.7	0	0	10760	0	1	1	2	24	1	6	1	1	3	3	2	1	1	1	1	1	2960	1120	2	0	0	0
103702	18456	18128	11	24	v	v	36.9	0	0	9570	245	0	1	2	24	1	6	1	1	3	3	2	1	1	1	0	1	2960	1120	2	0	1	0
103702	18486	18128	12	24	neg	neg	36.6	0	0	0	0	0	1	2	24	1	6	1	1	3	3	2	1	0	0	0	1	2960	1120	2	0	0	0
103702	18516	18128	13	24	neg	neg	36.7	0	0	0	0	0	1	2	24	1	6	1	1	3	3	2	1	0	0	0	1	2960	1120	2	0	0	0
103702	18546	18128	14	24	neg	neg	36.6	0	0	0	0	0	1	2	24	1	6	1	1	3	3	2	1	0	0	0	1	2960	1120	2	0	0	0
103702	18576	18128	15	24	neg	neg	36.5	0	0	0	0	0	1	2	24	1	6	1	1	3	3	2	1	0	0	0	1	2960	1120	2	0	0	0
103702	18606	18128	16	24	neg	neg	37	0	0	0	0	1	1	2	24	1	6	1	1	3	3	2	1	0	0	0	1	2960	1120	2	0	0	0
103702	18636	18128	17	24	neg	neg	36.9	0	0	0	0	0	1	2	24	1	6	1	1	3	3	2	1	0	0	0	1	2960	1120	2	0	0	0
103702	18666	18128	18	24	neg	neg	36.7	0	0	0	0	0	1	2	24	1	6	1	1	3	3	2	1	0	0	0	1	2960	1120	2	0	0	0
103702	18696	18128	19	24	neg	neg	36.6	0	0	0	0	0	1	2	24	1	6	1	1	3	3	2	1	0	0	0	1	2960	1120	2	0	0	0
103702	18726	18128	20	24	neg	neg	36.6	0	0	0	0	0	1	2	24	1	6	1	1	3	3	2	1	0	0	0	1	2960	1120	2	0	0	0
103702	18756	18128	21	24	neg	neg	36.7	0	0	0	0	0	1	2	24	1	6	1	1	3	3	2	1	0	0	0	1	2960	1120	2	0	0	0
103702	18786	18128	22	24	neg	neg	36.8	0	0	0	0	0	1	2	24	1	6	1	1	3	3	2	1	0	0	0	1	2960	1120	2	0	0	0
103702	18816	18128	23	24	neg	neg	36.8	0	0	0	0	0	1	2	24	1	6	1	1	3	3	2	1	0	0	0	1	2960	1120	2	0	0	0
103702	18846	18128	24	24	neg	neg	36.8	0	0	0	0	0	1	2	24	1	6	1	1	3	3	2	1	0	0	0	1	2960	1120	2	0	0	0
103803	18428	18400	1	19	neg	neg	36.7	0	0	0	0		1	1	15	1	8	4	1	2	3	1	2	0	0	0	2	5720	200	3	0	0	0
103803	18442	18400	2	19	v	v	36.6	0	0	1880	200	1	1	1	15	1	8	4	1	2	3	1	2	1	1	0	2	5720	200	3	0	0	0
103803	18488	18400	3	19	neg	neg	37.1	0	0	0	0	0	1	1	15	1	8	4	1	2	3	1	2	0	0	0	2	5720	200	3	0	0	0
103803	18518	18400	4	19	neg	v	37.1	0	0	0	0	0	1	1	15	1	8	4	1	2	3	1	2	0	1	0	2	5720	200	3	0	0	0
103803	18548	18400	5	19	neg	neg	37	0	0	0	0	0	1	1	15	1	8	4	1	2	3	1	2	0	0	0	2	5720	200	3	0	0	0
103803	18578	18400	6	19	neg	neg	37	0	0	0	0	0	1	1	15	1	8	4	1	2	3	1	2	0	0	0	2	5720	200	3	0	0	0
103803	18608	18400	7	19	neg	neg	37	0	0	0	0	0	1	1	15	1	8	4	1	2	3	1	2	0	0	0	2	5720	200	3	0	0	0
103803	18638	18400	8	19	neg	neg	37	0	0	0	0	0	1	1	15	1	8	4	1	2	3	1	2	0	0	0	2	5720	200	3	0	0	0
103803	18668	18400	9	19	neg	neg	36.6	0	0	0	0	0	1	1	15	1	8	4	1	2	3	1	2	0	0	0	2	5720	200	3	0	0	0
103803	18698	18400	10	19	neg	neg	36.6	0	0	0	0	0	1	1	15	1	8	4	1	2	3	1	2	0	0	0	2	5720	200	3	0	0	0
103803	18728	18400	11	19	neg	neg	36.6	0	0	0	0	0	1	1	15	1	8	4	1	2	3	1	2	0	0	0	2	5720	200	3	0	0	0
103803	18758	18400	12	19	neg	neg	36.9	0	0	0	0	0	1	1	15	1	8	4	1	2	3	1	2	0	0	0	2	5720	200	3	0	0	0
103803	18788	18400	13	19	neg	v	36.7	0	0	0	0	0	1	1	15	1	8	4	1	2	3	1	2	0	1	0	2	5720	200	3	0	0	0
103803	18818	18400	14	19	neg	neg	36.6	0	0	0	0	0	1	1	15	1	8	4	1	2	3	1	2	0	0	0	2	5720	200	3	0	0	0
103803	18848	18400	15	19	neg	neg	37	0	0	0	0	0	1	1	15	1	8	4	1	2	3	1	2	0	0	0	2	5720	200	3	0	0	0
103803	18878	18400	16	19	neg	neg	37	0	0	0	0	0	1	1	15	1	8	4	1	2	3	1	2	0	0	0	2	5720	200	3	0	0	0
103803	18908	18400	17	19	neg	neg	36.8	0	0	0	0	0	1	1	15	1	8	4	1	2	3	1	2	0	0	0	2	5720	200	3	0	0	0
103803	18938	18400	18	19	neg	neg	36.8	0	0	0	0	0	1	1	15	1	8	4	1	2	3	1	2	0	0	0	2	5720	200	3	0	0	0
103803	18968	18400	19	19	neg	neg	38.7	0	0	0	0	0	1	1	15	1	8	4	1	2	3	1	2	0	0	0	2	5720	200	3	0	0	0
103804	18448	18420	1	19	neg	neg	37.3	0	0	0	0		1	2	10	1	6	4	1	2	3	1	2	0	0	0	2	5280	0	3	0	0	0
103804	18455	18420	2	19	v	v	37	0	0	16744	744	0	1	2	10	1	6	4	1	2	3	1	2	1	1	0	2	5280	0	3	0	0	0
103804	18493	18420	3	19	v	v	36.9	0	0	4280	120	1	1	2	10	1	6	4	1	2	3	1	2	1	1	0	2	5280	0	3	0	1	0
103804	18535	18420	4	19	v	v	37.4	0	0	1433	4566	0	1	2	10	1	6	4	1	2	3	1	2	1	1	0	2	5280	0	3	0	1	0
103804	18568	18420	5	19	neg	neg	37	0	0	0	0	0	1	2	10	1	6	4	1	2	3	1	2	0	0	0	2	5280	0	3	0	0	0
103804	18598	18420	6	19	neg	neg	37	0	0	0	0	0	1	2	10	1	6	4	1	2	3	1	2	0	0	0	2	5280	0	3	0	0	0
103804	18628	18420	7	19	neg	neg	37	0	0	0	0	0	1	2	10	1	6	4	1	2	3	1	2	0	0	0	2	5280	0	3	0	0	0
103804	18658	18420	8	19	neg	neg	37	0	0	0	0	0	1	2	10	1	6	4	1	2	3	1	2	0	0	0	2	5280	0	3	0	0	0
103804	18688	18420	9	19	neg	neg	36.6	0	0	0	0	0	1	2	10	1	6	4	1	2	3	1	2	0	0	0	2	5280	0	3	0	0	0
103804	18703	18420	10	19	v	v	37.7	0	0	6640	24	1	1	2	10	1	6	4	1	2	3	1	2	1	1	1	2	5280	0	3	0	0	0
103804	18748	18420	11	19	neg	neg	36.8	0	0	0	0	0	1	2	10	1	6	4	1	2	3	1	2	0	0	0	2	5280	0	3	0	0	0
103804	18778	18420	12	19	v	v	37.4	0	0	200	0	0	1	2	10	1	6	4	1	2	3	1	2	1	1	0	2	5280	0	3	0	0	0
103804	18808	18420	13	19	neg	neg	36.9	0	0	0	0	0	1	2	10	1	6	4	1	2	3	1	2	0	0	0	2	5280	0	3	0	0	0
103804	18838	18420	14	19	neg	neg	36.9	0	0	0	0	0	1	2	10	1	6	4	1	2	3	1	2	0	0	0	2	5280	0	3	0	0	0
103804	18868	18420	15	19	neg	neg	36.7	0	0	0	0	0	1	2	10	1	6	4	1	2	3	1	2	0	0	0	2	5280	0	3	0	0	0
103804	18898	18420	16	19	neg	neg	36.5	0	0	0	0	0	1	2	10	1	6	4	1	2	3	1	2	0	0	0	2	5280	0	3	0	0	0
103804	18928	18420	17	19	neg	neg	37	0	0	0	0	0	1	2	10	1	6	4	1	2	3	1	2	0	0	0	2	5280	0	3	0	0	0
103804	18958	18420	18	19	neg	neg	37	0	0	0	0	0	1	2	10	1	6	4	1	2	3	1	2	0	0	0	2	5280	0	3	0	0	0
103804	18988	18420	19	19	neg	neg	37	0	0	0	0	0	1	2	10	1	6	4	1	2	3	1	2	0	0	0	2	5280	0	3	0	0	0
103905	18099	18071	1	24	neg	neg	36.5	0	0	0	0		1	1	14	1	6	4	3	2	3	1	2	0	0	0	1	2280	647	2	0	0	0
103905	18129	18071	2	24	neg	neg	36.8	0	0	0	0	0	1	1	14	1	6	4	3	2	3	1	2	0	0	0	1	2280	647	2	0	0	0
103905	18159	18071	3	24	neg	neg	37	0	0	0	0	0	1	1	14	1	6	4	3	2	3	1	2	0	0	0	1	2280	647	2	0	0	0
103905	18189	18071	4	24	neg	neg	36.9	0	0	0	0	0	1	1	14	1	6	4	3	2	3	1	2	0	0	0	1	2280	647	2	0	0	0
103905	18219	18071	5	24	neg	neg	36.9	0	0	0	0	0	1	1	14	1	6	4	3	2	3	1	2	0	0	0	1	2280	647	2	0	0	0
103905	18249	18071	6	24	neg	neg	37	0	0	0	0	0	1	1	14	1	6	4	3	2	3	1	2	0	0	0	1	2280	647	2	0	0	0
103905	18279	18071	7	24	neg	neg	36.6	0	0	0	0	0	1	1	14	1	6	4	3	2	3	1	2	0	0	0	1	2280	647	2	0	0	0
103905	18309	18071	8	24	neg	neg	37	0	0	0	0	0	1	1	14	1	6	4	3	2	3	1	2	0	0	0	1	2280	647	2	0	0	0
103905	18336	18071	9	24	neg	neg	36.9	0	0	0	0	0	1	1	14	1	6	4	3	2	3	1	2	0	0	0	1	2280	647	2	0	0	0
103905	18369	18071	10	24	neg	neg	36.6	0	0	0	0	0	1	1	14	1	6	4	3	2	3	1	2	0	0	0	1	2280	647	2	0	0	0
103905	18399	18071	11	24	neg	neg	36.9	0	0	0	0	0	1	1	14	1	6	4	3	2	3	1	2	0	0	0	1	2280	647	2	0	0	0
103905	18429	18071	12	24	neg	neg	36.7	0	0	0	0	0	1	1	14	1	6	4	3	2	3	1	2	0	0	0	1	2280	647	2	0	0	0
103905	18459	18071	13	24	neg	neg	36.8	0	0	0	0	0	1	1	14	1	6	4	3	2	3	1	2	0	0	0	1	2280	647	2	0	0	0
103905	18490	18071	14	24	neg	neg	36.8	0	0	0	0	0	1	1	14	1	6	4	3	2	3	1	2	0	0	0	1	2280	647	2	0	0	0
103905	18519	18071	15	24	neg	neg	36.6	0	0	0	0	0	1	1	14	1	6	4	3	2	3	1	2	0	0	0	1	2280	647	2	0	0	0
103905	18549	18071	16	24	neg	neg	36.9	0	0	0	0	0	1	1	14	1	6	4	3	2	3	1	2	0	0	0	1	2280	647	2	0	0	0
103905	18579	18071	17	24	neg	neg	36.6	0	0	0	0	0	1	1	14	1	6	4	3	2	3	1	2	0	0	0	1	2280	647	2	0	0	0
103905	18609	18071	18	24	neg	neg	36.6	0	0	0	0	0	1	1	14	1	6	4	3	2	3	1	2	0	0	0	1	2280	647	2	0	0	0
103905	18639	18071	19	24	neg	neg	36.7	0	0	0	0	0	1	1	14	1	6	4	3	2	3	1	2	0	0	0	1	2280	647	2	0	0	0
103905	18669	18071	20	24	neg	neg	36.7	0	0	0	0	0	1	1	14	1	6	4	3	2	3	1	2	0	0	0	1	2280	647	2	0	0	0
103905	18699	18071	21	24	neg	neg	36.6	0	0	0	0	0	1	1	14	1	6	4	3	2	3	1	2	0	0	0	1	2280	647	2	0	0	0
103905	18729	18071	22	24	neg	neg	36.7	0	0	0	0	0	1	1	14	1	6	4	3	2	3	1	2	0	0	0	1	2280	647	2	0	0	0
103905	18759	18071	23	24	neg	neg	36.6	0	0	0	0	0	1	1	14	1	6	4	3	2	3	1	2	0	0	0	1	2280	647	2	0	0	0
103905	18789	18071	24	24	neg	neg	36.8	0	0	0	0	0	1	1	14	1	6	4	3	2	3	1	2	0	0	0	1	2280	647	2	0	0	0
103906	18256	18228	1	24	neg	neg	37.3	0	0	0	0		1	2	8	1	1	4	3	1	2	1	1	0	0	0	1	272	16	1	0	0	0
103906	18269	18228	2	24	v	v	37	0	0	3080	28	0	1	2	8	1	1	4	3	1	2	1	1	1	1	0	1	272	16	1	0	0	0
103906	18292	18228	3	24	neg	v	39.8	33057	0	0	0	1	1	2	8	1	1	4	3	1	2	1	1	0	1	0	1	272	16	1	0	1	0
103906	18346	18228	4	24	v	v	36.5	0	0	24	32	0	1	2	8	1	1	4	3	1	2	1	1	1	1	0	1	272	16	1	0	0	0
103906	18376	18228	5	24	neg	v	37.1	0	0	0	0	0	1	2	8	1	1	4	3	1	2	1	1	0	1	0	1	272	16	1	0	1	0
103906	18389	18228	6	24	v	v	36.8	0	0	8360	0	1	1	2	8	1	1	4	3	1	2	1	1	1	1	0	1	272	16	1	0	0	0
103906	18436	18228	7	24	v	v	36.6	0	0	176	16	0	1	2	8	1	1	4	3	1	2	1	1	1	1	0	1	272	16	1	0	1	0
103906	18466	18228	8	24	neg	neg	37.5	0	0	0	0	0	1	2	8	1	1	4	3	1	2	1	1	0	0	0	1	272	16	1	0	0	0
103906	18496	18228	9	24	neg	neg	37.4	0	0	0	0	0	1	2	8	1	1	4	3	1	2	1	1	0	0	0	1	272	16	1	0	0	0
103906	18526	18228	10	24	neg	neg	36.8	0	0	0	0	0	1	2	8	1	1	4	3	1	2	1	1	0	0	0	1	272	16	1	0	0	0
103906	18556	18228	11	24	neg	neg	36.5	0	0	0	0	0	1	2	8	1	1	4	3	1	2	1	1	0	0	0	1	272	16	1	0	0	0
103906	18586	18228	12	24	neg	neg	36.9	0	0	0	0	0	1	2	8	1	1	4	3	1	2	1	1	0	0	0	1	272	16	1	0	0	0
103906	18616	18228	13	24	neg	neg	36.7	0	0	0	0	0	1	2	8	1	1	4	3	1	2	1	1	0	0	0	1	272	16	1	0	0	0
103906	18646	18228	14	24	neg	v	36.7	0	0	0	0	0	1	2	8	1	1	4	3	1	2	1	1	0	1	0	1	272	16	1	0	0	0
103906	18676	18228	15	24	neg	v	36.6	0	0	0	0	0	1	2	8	1	1	4	3	1	2	1	1	0	1	0	1	272	16	1	0	0	0
103906	18706	18228	16	24	neg	v	36.7	0	0	0	0	0	1	2	8	1	1	4	3	1	2	1	1	0	1	0	1	272	16	1	0	0	0
103906	18736	18228	17	24	neg	v	36.8	0	0	0	0	0	1	2	8	1	1	4	3	1	2	1	1	0	1	0	1	272	16	1	0	0	0
103906	18766	18228	18	24	neg	v	36.5	0	0	0	0	0	1	2	8	1	1	4	3	1	2	1	1	0	1	0	1	272	16	1	0	0	0
103906	18796	18228	19	24	neg	neg	36.8	0	0	0	0	0	1	2	8	1	1	4	3	1	2	1	1	0	0	0	1	272	16	1	0	0	0
103906	18826	18228	20	24	neg	neg	36.6	0	0	0	0	0	1	2	8	1	1	4	3	1	2	1	1	0	0	0	1	272	16	1	0	0	0
103906	18856	18228	21	24	neg	neg	36.9	0	0	0	0	0	1	2	8	1	1	4	3	1	2	1	1	0	0	0	1	272	16	1	0	0	0
103906	18886	18228	22	24	neg	neg	37	0	0	0	0	0	1	2	8	1	1	4	3	1	2	1	1	0	0	0	1	272	16	1	0	0	0
103906	18916	18228	23	24	neg	neg	37	0	0	0	0	0	1	2	8	1	1	4	3	1	2	1	1	0	0	0	1	272	16	1	0	0	0
103906	18946	18228	24	24	neg	neg	37	0	0	0	0	0	1	2	8	1	1	4	3	1	2	1	1	0	0	0	1	272	16	1	0	0	0
104002	18057	18029	1	24	neg	neg	36.5	0	0	0	0		1	2	24	1	6	1	1	3	3	1	2	0	0	0	1	6400	3480	3	0	0	0
104002	18087	18029	2	24	neg	neg	36.9	0	0	0	0	0	1	2	24	1	6	1	1	3	3	1	2	0	0	0	1	6400	3480	3	0	0	0
104002	18117	18029	3	24	neg	neg	36.8	0	0	0	0	0	1	2	24	1	6	1	1	3	3	1	2	0	0	0	1	6400	3480	3	0	0	0
104002	18147	18029	4	24	neg	neg	36.5	0	0	0	0	0	1	2	24	1	6	1	1	3	3	1	2	0	0	0	1	6400	3480	3	0	0	0
104002	18177	18029	5	24	neg	neg	36.8	0	0	0	0	0	1	2	24	1	6	1	1	3	3	1	2	0	0	0	1	6400	3480	3	0	0	0
104002	18207	18029	6	24	neg	neg	36.5	0	0	0	0	0	1	2	24	1	6	1	1	3	3	1	2	0	0	0	1	6400	3480	3	0	0	0
104002	18237	18029	7	24	neg	neg	36.5	0	0	0	0	0	1	2	24	1	6	1	1	3	3	1	2	0	0	0	1	6400	3480	3	0	0	0
104002	18267	18029	8	24	neg	neg	36.7	0	0	0	0	0	1	2	24	1	6	1	1	3	3	1	2	0	0	0	1	6400	3480	3	0	0	0
104002	18297	18029	9	24	neg	neg	36.8	0	0	0	0	0	1	2	24	1	6	1	1	3	3	1	2	0	0	0	1	6400	3480	3	0	0	0
104002	18323	18029	10	24	neg	neg	37	0	0	0	0	0	1	2	24	1	6	1	1	3	3	1	2	0	0	0	1	6400	3480	3	0	0	0
104002	18357	18029	11	24	neg	neg	36.7	0	0	0	0	0	1	2	24	1	6	1	1	3	3	1	2	0	0	0	1	6400	3480	3	0	0	0
104002	18387	18029	12	24	neg	neg	36.7	0	0	0	0	0	1	2	24	1	6	1	1	3	3	1	2	0	0	0	1	6400	3480	3	0	0	0
104002	18417	18029	13	24	neg	neg	36.7	0	0	0	0	0	1	2	24	1	6	1	1	3	3	1	2	0	0	0	1	6400	3480	3	0	0	0
104002	18446	18029	14	24	neg	neg	36.5	0	0	0	0	0	1	2	24	1	6	1	1	3	3	1	2	0	0	0	1	6400	3480	3	0	0	0
104002	18477	18029	15	24	neg	neg	36.7	0	0	0	0	0	1	2	24	1	6	1	1	3	3	1	2	0	0	0	1	6400	3480	3	0	0	0
104002	18507	18029	16	24	neg	neg	36.5	0	0	0	0	0	1	2	24	1	6	1	1	3	3	1	2	0	0	0	1	6400	3480	3	0	0	0
104002	18537	18029	17	24	neg	neg	36.8	0	0	0	0	0	1	2	24	1	6	1	1	3	3	1	2	0	0	0	1	6400	3480	3	0	0	0
104002	18567	18029	18	24	neg	neg	37	0	0	0	0	0	1	2	24	1	6	1	1	3	3	1	2	0	0	0	1	6400	3480	3	0	0	0
104002	18536	18029	19	24	neg	neg	36.8	0	0	0	0	0	1	2	24	1	6	1	1	3	3	1	2	0	0	0	1	6400	3480	3	0	0	0
104002	18627	18029	20	24	neg	neg	36.8	0	0	0	0	0	1	2	24	1	6	1	1	3	3	1	2	0	0	0	1	6400	3480	3	0	0	0
104002	18657	18029	21	24	neg	neg	36.6	0	0	0	0	0	1	2	24	1	6	1	1	3	3	1	2	0	0	0	1	6400	3480	3	0	0	0
104002	18687	18029	22	24	neg	neg	36.6	0	0	0	0	0	1	2	24	1	6	1	1	3	3	1	2	0	0	0	1	6400	3480	3	0	0	0
104002	18717	18029	23	24	neg	neg	36.6	0	0	0	0	0	1	2	24	1	6	1	1	3	3	1	2	0	0	0	1	6400	3480	3	0	0	0
104002	18729	18029	24	24	v	v	38.5	0	0	2080	200	1	1	2	24	1	6	1	1	3	3	1	2	1	1	1	1	6400	3480	3	0	0	0
104101	18501	18473	1	17	neg	neg	36.9	0	0	0	0		1	1	45	1	5	1	1	4	2	1	2	0	0	0	2	15098	711	3	0	0	0
104101	18531	18473	2	17	neg	neg	37	0	0	0	0	0	1	1	45	1	5	1	1	4	2	1	2	0	0	0	2	15098	711	3	0	0	0
104101	18561	18473	3	17	neg	neg	37	0	0	0	0	0	1	1	45	1	5	1	1	4	2	1	2	0	0	0	2	15098	711	3	0	0	0
104101	18591	18473	4	17	neg	neg	36.6	0	0	0	0	0	1	1	45	1	5	1	1	4	2	1	2	0	0	0	2	15098	711	3	0	0	0
104101	18611	18473	5	17	f	f	37	7680	0	0	0	1	1	1	45	1	5	1	1	4	2	1	2	0	0	0	2	15098	711	3	0	0	1
104101	18651	18473	6	17	neg	neg	36.8	0	0	0	0	0	1	1	45	1	5	1	1	4	2	1	2	0	0	0	2	15098	711	3	0	0	0
104101	18681	18473	7	17	neg	neg	36.7	0	0	0	0	0	1	1	45	1	5	1	1	4	2	1	2	0	0	0	2	15098	711	3	0	0	0
104101	18711	18473	8	17	neg	neg	36.5	0	0	0	0	0	1	1	45	1	5	1	1	4	2	1	2	0	0	0	2	15098	711	3	0	0	0
104101	18741	18473	9	17	neg	neg	36.6	0	0	0	0	0	1	1	45	1	5	1	1	4	2	1	2	0	0	0	2	15098	711	3	0	0	0
104101	18771	18473	10	17	neg	neg	36.8	0	0	0	0	0	1	1	45	1	5	1	1	4	2	1	2	0	0	0	2	15098	711	3	0	0	0
104101	18801	18473	11	17	neg	neg	37	0	0	0	0	0	1	1	45	1	5	1	1	4	2	1	2	0	0	0	2	15098	711	3	0	0	0
104101	18831	18473	12	17	neg	neg	36.9	0	0	0	0	0	1	1	45	1	5	1	1	4	2	1	2	0	0	0	2	15098	711	3	0	0	0
104101	18861	18473	13	17	neg	neg	36.7	0	0	0	0	0	1	1	45	1	5	1	1	4	2	1	2	0	0	0	2	15098	711	3	0	0	0
104101	18891	18473	14	17	neg	neg	36.9	0	0	0	0	0	1	1	45	1	5	1	1	4	2	1	2	0	0	0	2	15098	711	3	0	0	0
104101	18921	18473	15	17	neg	neg	37	0	0	0	0	0	1	1	45	1	5	1	1	4	2	1	2	0	0	0	2	15098	711	3	0	0	0
104101	18951	18473	16	17	neg	neg	36.8	0	0	0	0	0	1	1	45	1	5	1	1	4	2	1	2	0	0	0	2	15098	711	3	0	0	0
104101	18981	18473	17	17	neg	neg	36.8	0	0	0	0	0	1	1	45	1	5	1	1	4	2	1	2	0	0	0	2	15098	711	3	0	0	0
104103	18248	18220	1	24	neg	neg	36.5	0	0	0	0		1	1	12	1	5	4	1	2	2	1	1	0	0	0	1	6240	80	3	0	0	0
104103	18278	18220	2	24	v	v	36.8	0	0	260	60	0	1	1	12	1	5	4	1	2	2	1	1	1	1	0	1	6240	80	3	0	0	0
104103	18308	18220	3	24	neg	neg	37	0	0	0	0	0	1	1	12	1	5	4	1	2	2	1	1	0	0	0	1	6240	80	3	0	0	0
104103	18338	18220	4	24	v	v	37.3	0	0	224	0	0	1	1	12	1	5	4	1	2	2	1	1	1	1	0	1	6240	80	3	0	0	0
104103	18368	18220	5	24	neg	neg	36.6	0	0	0	0	0	1	1	12	1	5	4	1	2	2	1	1	0	0	0	1	6240	80	3	0	0	0
104103	18398	18220	6	24	neg	f	36.8	0	0	0	0	0	1	1	12	1	5	4	1	2	2	1	1	0	0	0	1	6240	80	3	0	0	0
104103	18403	18220	7	24	f	f	40.5	88	0	0	0	1	1	1	12	1	5	4	1	2	2	1	1	0	0	0	1	6240	80	3	0	0	1
104103	18458	18220	8	24	neg	neg	37.3	0	0	0	0	1	1	1	12	1	5	4	1	2	2	1	1	0	0	0	1	6240	80	3	0	0	0
104103	18488	18220	9	24	neg	neg	37.3	0	0	0	0	0	1	1	12	1	5	4	1	2	2	1	1	0	0	0	1	6240	80	3	0	0	0
104103	18518	18220	10	24	neg	neg	37	0	0	0	0	0	1	1	12	1	5	4	1	2	2	1	1	0	0	0	1	6240	80	3	0	0	0
104103	18548	18220	11	24	neg	neg	36.8	0	0	0	0	0	1	1	12	1	5	4	1	2	2	1	1	0	0	0	1	6240	80	3	0	0	0
104103	18578	18220	12	24	neg	neg	36.8	0	0	0	0	0	1	1	12	1	5	4	1	2	2	1	1	0	0	0	1	6240	80	3	0	0	0
104103	18608	18220	13	24	neg	neg	39.7	0	0	0	0	1	1	1	12	1	5	4	1	2	2	1	1	0	0	0	1	6240	80	3	0	0	0
104103	18638	18220	14	24	neg	neg	36.7	0	0	0	0	0	1	1	12	1	5	4	1	2	2	1	1	0	0	0	1	6240	80	3	0	0	0
104103	18668	18220	15	24	neg	neg	36.8	0	0	0	0	0	1	1	12	1	5	4	1	2	2	1	1	0	0	0	1	6240	80	3	0	0	0
104103	18698	18220	16	24	neg	neg	36.6	0	0	0	0	0	1	1	12	1	5	4	1	2	2	1	1	0	0	0	1	6240	80	3	0	0	0
104103	18728	18220	17	24	neg	neg	36.6	0	0	0	0	0	1	1	12	1	5	4	1	2	2	1	1	0	0	0	1	6240	80	3	0	0	0
104103	18758	18220	18	24	neg	v	36.7	0	0	0	0	0	1	1	12	1	5	4	1	2	2	1	1	0	1	0	1	6240	80	3	0	0	0
104103	18788	18220	19	24	neg	v	36.8	0	0	0	0	0	1	1	12	1	5	4	1	2	2	1	1	0	1	0	1	6240	80	3	0	0	0
104103	18818	18220	20	24	neg	neg	37	0	0	0	0	0	1	1	12	1	5	4	1	2	2	1	1	0	0	0	1	6240	80	3	0	0	0
104103	18848	18220	21	24	neg	neg	36.6	0	0	0	0	0	1	1	12	1	5	4	1	2	2	1	1	0	0	0	1	6240	80	3	0	0	0
104103	18878	18220	22	24	neg	neg	36.9	0	0	0	0	0	1	1	12	1	5	4	1	2	2	1	1	0	0	0	1	6240	80	3	0	0	0
104103	18908	18220	23	24	neg	v	36.7	0	0	0	0	0	1	1	12	1	5	4	1	2	2	1	1	0	1	0	1	6240	80	3	0	0	0
104103	18938	18220	24	24	neg	neg	36.6	0	0	0	0	0	1	1	12	1	5	4	1	2	2	1	1	0	0	0	1	6240	80	3	0	0	0
104104	18235	18207	1	24	neg	neg	37.4	0	0	0	0		1	2	7	1	0	0	1	1	1	1	1	0	0	0	1	19280	560	3	0	0	0
104104	18265	18207	2	24	neg	neg	37.1	0	0	0	0	0	1	2	7	1	0	0	1	1	1	1	1	0	0	0	1	19280	560	3	0	0	0
104104	18295	18207	3	24	neg	neg	36.6	0	0	0	0	1	1	2	7	1	0	0	1	1	1	1	1	0	0	0	1	19280	560	3	0	0	0
104104	18323	18207	4	24	neg	neg	37	0	0	0	0	0	1	2	7	1	0	0	1	1	1	1	1	0	0	0	1	19280	560	3	0	0	0
104104	18355	18207	5	24	neg	neg	37.3	0	0	0	0	0	1	2	7	1	0	0	1	1	1	1	1	0	0	0	1	19280	560	3	0	0	0
104104	18379	18207	6	24	f	f	39	7040	0	0	0	1	1	2	7	1	0	0	1	1	1	1	1	0	0	0	1	19280	560	3	0	0	1
104104	18415	18207	7	24	neg	neg	36.9	0	0	0	0	0	1	2	7	1	0	0	1	1	1	1	1	0	0	0	1	19280	560	3	0	0	0
104104	18445	18207	8	24	neg	neg	36.9	0	0	0	0	0	1	2	7	1	0	0	1	1	1	1	1	0	0	0	1	19280	560	3	0	0	0
104104	18475	18207	9	24	neg	neg	37.1	0	0	0	0	0	1	2	7	1	0	0	1	1	1	1	1	0	0	0	1	19280	560	3	0	0	0
104104	18505	18207	10	24	neg	neg	37.5	0	0	0	0	0	1	2	7	1	0	0	1	1	1	1	1	0	0	0	1	19280	560	3	0	0	0
104104	18535	18207	11	24	neg	neg	37.1	0	0	0	0	0	1	2	7	1	0	0	1	1	1	1	1	0	0	0	1	19280	560	3	0	0	0
104104	18565	18207	12	24	neg	neg	37	0	0	0	0	0	1	2	7	1	0	0	1	1	1	1	1	0	0	0	1	19280	560	3	0	0	0
104104	18595	18207	13	24	v	v	38.3	0	0	1800	480	1	1	2	7	1	0	0	1	1	1	1	1	1	1	1	1	19280	560	3	0	0	0
104104	18625	18207	14	24	neg	neg	37.1	0	0	0	0	0	1	2	7	1	0	0	1	1	1	1	1	0	0	0	1	19280	560	3	0	0	0
104104	18655	18207	15	24	neg	neg	36.8	0	0	0	0	0	1	2	7	1	0	0	1	1	1	1	1	0	0	0	1	19280	560	3	0	0	0
104104	18685	18207	16	24	neg	neg	36.6	0	0	0	0	0	1	2	7	1	0	0	1	1	1	1	1	0	0	0	1	19280	560	3	0	0	0
104104	18715	18207	17	24	neg	neg	36.6	0	0	0	0	0	1	2	7	1	0	0	1	1	1	1	1	0	0	0	1	19280	560	3	0	0	0
104104	18745	18207	18	24	neg	neg	36.8	0	0	0	0	0	1	2	7	1	0	0	1	1	1	1	1	0	0	0	1	19280	560	3	0	0	0
104104	18775	18207	19	24	neg	neg	36.7	0	0	0	0	0	1	2	7	1	0	0	1	1	1	1	1	0	0	0	1	19280	560	3	0	0	0
104104	18805	18207	20	24	neg	neg	36.8	0	0	0	0	0	1	2	7	1	0	0	1	1	1	1	1	0	0	0	1	19280	560	3	0	0	0
104104	18835	18207	21	24	neg	neg	36.8	0	0	0	0	0	1	2	7	1	0	0	1	1	1	1	1	0	0	0	1	19280	560	3	0	0	0
104104	18865	18207	22	24	neg	neg	36.6	0	0	0	0	0	1	2	7	1	0	0	1	1	1	1	1	0	0	0	1	19280	560	3	0	0	0
104104	18895	18207	23	24	neg	neg	37	0	0	0	0	0	1	2	7	1	0	0	1	1	1	1	1	0	0	0	1	19280	560	3	0	0	0
104104	18925	18207	24	24	neg	neg	36.8	0	0	0	0	0	1	2	7	1	0	0	1	1	1	1	1	0	0	0	1	19280	560	3	0	0	0
104105	18236	18208	1	24	neg	neg	37.4	0	0	0	0		1	1	6	1	0	0	1	1	1	1	1	0	0	0	1	14120	880	3	0	0	0
104105	18266	18208	2	24	neg	neg	37.4	0	0	0	0	0	1	1	6	1	0	0	1	1	1	1	1	0	0	0	1	14120	880	3	0	0	0
104105	18296	18208	3	24	neg	neg	36.7	0	0	0	0	0	1	1	6	1	0	0	1	1	1	1	1	0	0	0	1	14120	880	3	0	0	0
104105	18323	18208	4	24	neg	neg	37	0	0	0	0	0	1	1	6	1	0	0	1	1	1	1	1	0	0	0	1	14120	880	3	0	0	0
104105	18356	18208	5	24	neg	neg	37.4	0	0	0	0	0	1	1	6	1	0	0	1	1	1	1	1	0	0	0	1	14120	880	3	0	0	0
104105	18366	18208	6	24	neg	neg	39.6	0	0	0	0	1	1	1	6	1	0	0	1	1	1	1	1	0	0	0	1	14120	880	3	0	0	0
104105	18414	18208	7	24	v	v	38.1	0	0	3080	0	0	1	1	6	1	0	0	1	1	1	1	1	1	1	1	1	14120	880	3	0	0	0
104105	18446	18208	8	24	neg	neg	36.8	0	0	0	0	0	1	1	6	1	0	0	1	1	1	1	1	0	0	0	1	14120	880	3	0	0	0
104105	18476	18208	9	24	neg	neg	37.4	0	0	0	0	0	1	1	6	1	0	0	1	1	1	1	1	0	0	0	1	14120	880	3	0	0	0
104105	18506	18208	10	24	neg	neg	37.2	0	0	0	0	0	1	1	6	1	0	0	1	1	1	1	1	0	0	0	1	14120	880	3	0	0	0
104105	18536	18208	11	24	neg	neg	36.6	0	0	0	0	0	1	1	6	1	0	0	1	1	1	1	1	0	0	0	1	14120	880	3	0	0	0
104105	18566	18208	12	24	neg	neg	37	0	0	0	0	0	1	1	6	1	0	0	1	1	1	1	1	0	0	0	1	14120	880	3	0	0	0
104105	18596	18208	13	24	neg	neg	36.9	0	0	0	0	0	1	1	6	1	0	0	1	1	1	1	1	0	0	0	1	14120	880	3	0	0	0
104105	18626	18208	14	24	neg	neg	36.6	0	0	0	0	0	1	1	6	1	0	0	1	1	1	1	1	0	0	0	1	14120	880	3	0	0	0
104105	18656	18208	15	24	neg	neg	36.7	0	0	0	0	0	1	1	6	1	0	0	1	1	1	1	1	0	0	0	1	14120	880	3	0	0	0
104105	18686	18208	16	24	neg	neg	36.6	0	0	0	0	0	1	1	6	1	0	0	1	1	1	1	1	0	0	0	1	14120	880	3	0	0	0
104105	18716	18208	17	24	neg	neg	36.6	0	0	0	0	0	1	1	6	1	0	0	1	1	1	1	1	0	0	0	1	14120	880	3	0	0	0
104105	18746	18208	18	24	neg	neg	36.7	0	0	0	0	0	1	1	6	1	0	0	1	1	1	1	1	0	0	0	1	14120	880	3	0	0	0
104105	18776	18208	19	24	neg	neg	36.8	0	0	0	0	0	1	1	6	1	0	0	1	1	1	1	1	0	0	0	1	14120	880	3	0	0	0
104105	18806	18208	20	24	neg	neg	37	0	0	0	0	0	1	1	6	1	0	0	1	1	1	1	1	0	0	0	1	14120	880	3	0	0	0
104105	18836	18208	21	24	neg	neg	36.8	0	0	0	0	0	1	1	6	1	0	0	1	1	1	1	1	0	0	0	1	14120	880	3	0	0	0
104105	18866	18208	22	24	neg	neg	36.5	0	0	0	0	0	1	1	6	1	0	0	1	1	1	1	1	0	0	0	1	14120	880	3	0	0	0
104105	18896	18208	23	24	neg	neg	37	0	0	0	0	0	1	1	6	1	0	0	1	1	1	1	1	0	0	0	1	14120	880	3	0	0	0
104105	18926	18208	24	24	neg	neg	36.8	0	0	0	0	0	1	1	6	1	0	0	1	1	1	1	1	0	0	0	1	14120	880	3	0	0	0
104204	18406	18378	1	20	neg	neg	37	0	0	0	0		1	2	5	1	0	0	3	1	1	1	2	0	0	0	2	8000	1240	3	0	0	0
104204	18437	18378	2	20	neg	neg	37.8	0	0	0	0	0	1	2	5	1	0	0	3	1	1	1	2	0	0	0	2	8000	1240	3	0	0	0
104204	18450	18378	3	20	f	f	37.8	1080	0	0	0	1	1	2	5	1	0	0	3	1	1	1	2	0	0	0	2	8000	1240	3	0	0	1
104204	18496	18378	4	20	neg	neg	37.3	0	0	0	0	0	1	2	5	1	0	0	3	1	1	1	2	0	0	0	2	8000	1240	3	0	0	0
104204	18526	18378	5	20	neg	neg	37	0	0	0	0	0	1	2	5	1	0	0	3	1	1	1	2	0	0	0	2	8000	1240	3	0	0	0
104204	18556	18378	6	20	neg	neg	37	0	0	0	0	0	1	2	5	1	0	0	3	1	1	1	2	0	0	0	2	8000	1240	3	0	0	0
104204	18586	18378	7	20	neg	neg	36.7	0	0	0	0	0	1	2	5	1	0	0	3	1	1	1	2	0	0	0	2	8000	1240	3	0	0	0
104204	18616	18378	8	20	neg	neg	37	0	0	0	0	0	1	2	5	1	0	0	3	1	1	1	2	0	0	0	2	8000	1240	3	0	0	0
104204	18646	18378	9	20	neg	neg	36.7	0	0	0	0	0	1	2	5	1	0	0	3	1	1	1	2	0	0	0	2	8000	1240	3	0	0	0
104204	18676	18378	10	20	neg	neg	36.6	0	0	0	0	0	1	2	5	1	0	0	3	1	1	1	2	0	0	0	2	8000	1240	3	0	0	0
104204	18706	18378	11	20	neg	neg	36.6	0	0	0	0	0	1	2	5	1	0	0	3	1	1	1	2	0	0	0	2	8000	1240	3	0	0	0
104204	18736	18378	12	20	neg	neg	37.3	0	0	0	0	0	1	2	5	1	0	0	3	1	1	1	2	0	0	0	2	8000	1240	3	0	0	0
104204	18766	18378	13	20	neg	neg	36.7	0	0	0	0	0	1	2	5	1	0	0	3	1	1	1	2	0	0	0	2	8000	1240	3	0	0	0
104204	18796	18378	14	20	neg	v	36.7	0	0	0	0	0	1	2	5	1	0	0	3	1	1	1	2	0	1	0	2	8000	1240	3	0	0	0
104204	18826	18378	15	20	neg	neg	36.8	0	0	0	0	0	1	2	5	1	0	0	3	1	1	1	2	0	0	0	2	8000	1240	3	0	0	0
104204	18856	18378	16	20	neg	neg	36.5	0	0	0	0	0	1	2	5	1	0	0	3	1	1	1	2	0	0	0	2	8000	1240	3	0	0	0
104204	18886	18378	17	20	neg	neg	36.7	0	0	0	0	0	1	2	5	1	0	0	3	1	1	1	2	0	0	0	2	8000	1240	3	0	0	0
104204	18916	18378	18	20	neg	neg	36.9	0	0	0	0	0	1	2	5	1	0	0	3	1	1	1	2	0	0	0	2	8000	1240	3	0	0	0
104204	18946	18378	19	20	neg	neg	36.8	0	0	0	0	0	1	2	5	1	0	0	3	1	1	1	2	0	0	0	2	8000	1240	3	0	0	0
104204	18976	18378	20	20	neg	neg	36.6	0	0	0	0	0	1	2	5	1	0	0	3	1	1	1	2	0	0	0	2	8000	1240	3	0	0	0
104303	18058	18030	1	24	neg	neg	36.5	0	0	0	0		1	1	6	1	0	0	3	1	1	1	2	0	0	0	1	400	12000	1	0	0	0
104303	18088	18030	2	24	neg	neg	36.8	0	0	0	0	0	1	1	6	1	0	0	3	1	1	1	2	0	0	0	1	400	12000	1	0	0	0
104303	18118	18030	3	24	neg	neg	36.8	0	0	0	0	0	1	1	6	1	0	0	3	1	1	1	2	0	0	0	1	400	12000	1	0	0	0
104303	18149	18030	4	24	neg	neg	36.8	0	0	0	0	0	1	1	6	1	0	0	3	1	1	1	2	0	0	0	1	400	12000	1	0	0	0
104303	18179	18030	5	24	neg	neg	36.5	0	0	0	0	0	1	1	6	1	0	0	3	1	1	1	2	0	0	0	1	400	12000	1	0	0	0
104303	18208	18030	6	24	neg	neg	37.5	0	0	0	0	0	1	1	6	1	0	0	3	1	1	1	2	0	0	0	1	400	12000	1	0	0	0
104303	18238	18030	7	24	neg	neg	36.6	0	0	0	0	0	1	1	6	1	0	0	3	1	1	1	2	0	0	0	1	400	12000	1	0	0	0
104303	18268	18030	8	24	neg	neg	36.6	0	0	0	0	0	1	1	6	1	0	0	3	1	1	1	2	0	0	0	1	400	12000	1	0	0	0
104303	18298	18030	9	24	neg	neg	36.6	0	0	0	0	0	1	1	6	1	0	0	3	1	1	1	2	0	0	0	1	400	12000	1	0	0	0
104303	18323	18030	10	24	neg	neg	37.3	0	0	0	0	0	1	1	6	1	0	0	3	1	1	1	2	0	0	0	1	400	12000	1	0	0	0
104303	18358	18030	11	24	neg	neg	37.2	0	0	0	0	0	1	1	6	1	0	0	3	1	1	1	2	0	0	0	1	400	12000	1	0	0	0
104303	18388	18030	12	24	neg	neg	36.8	0	0	0	0	0	1	1	6	1	0	0	3	1	1	1	2	0	0	0	1	400	12000	1	0	0	0
104303	18419	18030	13	24	neg	neg	37.6	0	0	0	0	1	1	1	6	1	0	0	3	1	1	1	2	0	0	0	1	400	12000	1	0	0	0
104303	18448	18030	14	24	neg	neg	37.6	0	0	0	0	0	1	1	6	1	0	0	3	1	1	1	2	0	0	0	1	400	12000	1	0	0	0
104303	18478	18030	15	24	neg	neg	37.5	0	0	0	0	0	1	1	6	1	0	0	3	1	1	1	2	0	0	0	1	400	12000	1	0	0	0
104303	18508	18030	16	24	neg	neg	37	0	0	0	0	0	1	1	6	1	0	0	3	1	1	1	2	0	0	0	1	400	12000	1	0	0	0
104303	18538	18030	17	24	neg	neg	36.5	0	0	0	0	0	1	1	6	1	0	0	3	1	1	1	2	0	0	0	1	400	12000	1	0	0	0
104303	18568	18030	18	24	neg	neg	37	0	0	0	0	0	1	1	6	1	0	0	3	1	1	1	2	0	0	0	1	400	12000	1	0	0	0
104303	18537	18030	19	24	neg	neg	37	0	0	0	0	0	1	1	6	1	0	0	3	1	1	1	2	0	0	0	1	400	12000	1	0	0	0
104303	18628	18030	20	24	neg	neg	37.3	0	0	0	0	1	1	1	6	1	0	0	3	1	1	1	2	0	0	0	1	400	12000	1	0	0	0
104303	18658	18030	21	24	neg	neg	37	0	0	0	0	0	1	1	6	1	0	0	3	1	1	1	2	0	0	0	1	400	12000	1	0	0	0
104303	18688	18030	22	24	neg	neg	36.5	0	0	0	0	0	1	1	6	1	0	0	3	1	1	1	2	0	0	0	1	400	12000	1	0	0	0
104303	18718	18030	23	24	neg	neg	36.7	0	0	0	0	0	1	1	6	1	0	0	3	1	1	1	2	0	0	0	1	400	12000	1	0	0	0
104303	18748	18030	24	24	neg	neg	37	0	0	0	0	0	1	1	6	1	0	0	3	1	1	1	2	0	0	0	1	400	12000	1	0	0	0
104705	18097	18069	1	24	neg	neg	36.7	0	0	0	0		1	2	5	1	0	0	3	1	1	1	2	0	0	0	1	4560	640	2	0	0	0
104705	18127	18069	2	24	neg	neg	36.8	0	0	0	0	0	1	2	5	1	0	0	3	1	1	1	2	0	0	0	1	4560	640	2	0	0	0
104705	18157	18069	3	24	neg	neg	36.5	0	0	0	0	0	1	2	5	1	0	0	3	1	1	1	2	0	0	0	1	4560	640	2	0	0	0
104705	18187	18069	4	24	neg	neg	36.5	0	0	0	0	0	1	2	5	1	0	0	3	1	1	1	2	0	0	0	1	4560	640	2	0	0	0
104705	18217	18069	5	24	neg	neg	37	0	0	0	0	0	1	2	5	1	0	0	3	1	1	1	2	0	0	0	1	4560	640	2	0	0	0
104705	18247	18069	6	24	neg	neg	40	0	0	0	0	0	1	2	5	1	0	0	3	1	1	1	2	0	0	0	1	4560	640	2	0	0	0
104705	18277	18069	7	24	neg	neg	37	0	0	0	0	0	1	2	5	1	0	0	3	1	1	1	2	0	0	0	1	4560	640	2	0	0	0
104705	18307	18069	8	24	neg	neg	36.6	0	0	0	0	0	1	2	5	1	0	0	3	1	1	1	2	0	0	0	1	4560	640	2	0	0	0
104705	18337	18069	9	24	neg	neg	37	0	0	0	0	0	1	2	5	1	0	0	3	1	1	1	2	0	0	0	1	4560	640	2	0	0	0
104705	18367	18069	10	24	neg	neg	37	0	0	0	0	0	1	2	5	1	0	0	3	1	1	1	2	0	0	0	1	4560	640	2	0	0	0
104705	18397	18069	11	24	neg	neg	37	0	0	0	0	0	1	2	5	1	0	0	3	1	1	1	2	0	0	0	1	4560	640	2	0	0	0
104705	18427	18069	12	24	neg	neg	36.7	0	0	0	0	0	1	2	5	1	0	0	3	1	1	1	2	0	0	0	1	4560	640	2	0	0	0
104705	18457	18069	13	24	neg	f	37	0	0	0	0	0	1	2	5	1	0	0	3	1	1	1	2	0	0	0	1	4560	640	2	0	0	0
104705	18487	18069	14	24	neg	neg	36.5	0	0	0	0	0	1	2	5	1	0	0	3	1	1	1	2	0	0	0	1	4560	640	2	0	0	0
104705	18517	18069	15	24	neg	neg	36.5	0	0	0	0	0	1	2	5	1	0	0	3	1	1	1	2	0	0	0	1	4560	640	2	0	0	0
104705	18547	18069	16	24	neg	neg	37.1	0	0	0	0	1	1	2	5	1	0	0	3	1	1	1	2	0	0	0	1	4560	640	2	0	0	0
104705	18577	18069	17	24	neg	neg	37	0	0	0	0	0	1	2	5	1	0	0	3	1	1	1	2	0	0	0	1	4560	640	2	0	0	0
104705	18607	18069	18	24	neg	neg	36.7	0	0	0	0	0	1	2	5	1	0	0	3	1	1	1	2	0	0	0	1	4560	640	2	0	0	0
104705	18637	18069	19	24	neg	neg	36.7	0	0	0	0	0	1	2	5	1	0	0	3	1	1	1	2	0	0	0	1	4560	640	2	0	0	0
104705	18667	18069	20	24	neg	neg	36.6	0	0	0	0	0	1	2	5	1	0	0	3	1	1	1	2	0	0	0	1	4560	640	2	0	0	0
104705	18697	18069	21	24	neg	neg	36.6	0	0	0	0	0	1	2	5	1	0	0	3	1	1	1	2	0	0	0	1	4560	640	2	0	0	0
104705	18727	18069	22	24	neg	neg	36.5	0	0	0	0	0	1	2	5	1	0	0	3	1	1	1	2	0	0	0	1	4560	640	2	0	0	0
104705	18757	18069	23	24	neg	neg	36.8	0	0	0	0	0	1	2	5	1	0	0	3	1	1	1	2	0	0	0	1	4560	640	2	0	0	0
104705	18787	18069	24	24	neg	neg	37	0	0	0	0	0	1	2	5	1	0	0	3	1	1	1	2	0	0	0	1	4560	640	2	0	0	0
104805	18464	18436	1	18	neg	neg	37.2	0	0	0	0		1	1	14	1	6	4	3	2	3	1	2	0	0	0	2	6520	360	3	0	0	0
104805	18494	18436	2	18	neg	neg	36.6	0	0	0	0	0	1	1	14	1	6	4	3	2	3	1	2	0	0	0	2	6520	360	3	0	0	0
104805	18524	18436	3	18	neg	neg	37	0	0	0	0	0	1	1	14	1	6	4	3	2	3	1	2	0	0	0	2	6520	360	3	0	0	0
104805	18554	18436	4	18	neg	neg	36.9	0	0	0	0	0	1	1	14	1	6	4	3	2	3	1	2	0	0	0	2	6520	360	3	0	0	0
104805	18584	18436	5	18	neg	neg	37	0	0	0	0	0	1	1	14	1	6	4	3	2	3	1	2	0	0	0	2	6520	360	3	0	0	0
104805	18614	18436	6	18	neg	neg	36.8	0	0	0	0	0	1	1	14	1	6	4	3	2	3	1	2	0	0	0	2	6520	360	3	0	0	0
104805	18644	18436	7	18	neg	neg	37.1	0	0	0	0	0	1	1	14	1	6	4	3	2	3	1	2	0	0	0	2	6520	360	3	0	0	0
104805	18674	18436	8	18	neg	neg	36.7	0	0	0	0	0	1	1	14	1	6	4	3	2	3	1	2	0	0	0	2	6520	360	3	0	0	0
104805	18704	18436	9	18	neg	neg	36.6	0	0	0	0	0	1	1	14	1	6	4	3	2	3	1	2	0	0	0	2	6520	360	3	0	0	0
104805	18734	18436	10	18	neg	neg	36.7	0	0	0	0	0	1	1	14	1	6	4	3	2	3	1	2	0	0	0	2	6520	360	3	0	0	0
104805	18764	18436	11	18	neg	neg	36.6	0	0	0	0	0	1	1	14	1	6	4	3	2	3	1	2	0	0	0	2	6520	360	3	0	0	0
104805	18794	18436	12	18	neg	neg	36.7	0	0	0	0	1	1	1	14	1	6	4	3	2	3	1	2	0	0	0	2	6520	360	3	0	0	0
104805	18824	18436	13	18	neg	neg	37	0	0	0	0	0	1	1	14	1	6	4	3	2	3	1	2	0	0	0	2	6520	360	3	0	0	0
104805	18854	18436	14	18	neg	neg	36.9	0	0	0	0	0	1	1	14	1	6	4	3	2	3	1	2	0	0	0	2	6520	360	3	0	0	0
104805	18884	18436	15	18	neg	neg	36.8	0	0	0	0	0	1	1	14	1	6	4	3	2	3	1	2	0	0	0	2	6520	360	3	0	0	0
104805	18914	18436	16	18	neg	neg	36.8	0	0	0	0	0	1	1	14	1	6	4	3	2	3	1	2	0	0	0	2	6520	360	3	0	0	0
104805	18944	18436	17	18	neg	neg	36.8	0	0	0	0	0	1	1	14	1	6	4	3	2	3	1	2	0	0	0	2	6520	360	3	0	0	0
104805	18974	18436	18	18	neg	neg	36.8	0	0	0	0	0	1	1	14	1	6	4	3	2	3	1	2	0	0	0	2	6520	360	3	0	0	0
104906	18441	18413	1	19	neg	neg	36.7	0	0	0	0		1	1	12	1	6	4	3	2	3	2	2	0	0	0	2	3240	280	2	0	0	0
104906	18501	18413	3	19	neg	v	36.7	0	0	0	0	0	1	1	12	1	6	4	3	2	3	2	2	0	1	0	2	3240	280	2	0	0	0
104906	18531	18413	4	19	neg	neg	37	0	0	0	0	0	1	1	12	1	6	4	3	2	3	2	2	0	0	0	2	3240	280	2	0	0	0
104906	18561	18413	5	19	neg	v	37	0	0	0	0	0	1	1	12	1	6	4	3	2	3	2	2	0	1	0	2	3240	280	2	0	0	0
104906	18591	18413	6	19	neg	v	36.8	0	0	0	0	0	1	1	12	1	6	4	3	2	3	2	2	0	1	0	2	3240	280	2	0	0	0
104906	18621	18413	7	19	neg	neg	37	0	0	0	0	0	1	1	12	1	6	4	3	2	3	2	2	0	0	0	2	3240	280	2	0	0	0
104906	18651	18413	8	19	neg	neg	36.9	0	0	0	0	0	1	1	12	1	6	4	3	2	3	2	2	0	0	0	2	3240	280	2	0	0	0
104906	18681	18413	9	19	neg	neg	36.7	0	0	0	0	0	1	1	12	1	6	4	3	2	3	2	2	0	0	0	2	3240	280	2	0	0	0
104906	18711	18413	10	19	neg	neg	36.6	0	0	0	0	0	1	1	12	1	6	4	3	2	3	2	2	0	0	0	2	3240	280	2	0	0	0
104906	18741	18413	11	19	neg	neg	36.8	0	0	0	0	0	1	1	12	1	6	4	3	2	3	2	2	0	0	0	2	3240	280	2	0	0	0
104906	18771	18413	12	19	neg	neg	36.6	0	0	0	0	0	1	1	12	1	6	4	3	2	3	2	2	0	0	0	2	3240	280	2	0	0	0
104906	18801	18413	13	19	neg	neg	37.1	0	0	0	0	0	1	1	12	1	6	4	3	2	3	2	2	0	0	0	2	3240	280	2	0	0	0
104906	18831	18413	14	19	neg	neg	36.8	0	0	0	0	0	1	1	12	1	6	4	3	2	3	2	2	0	0	0	2	3240	280	2	0	0	0
104906	18861	18413	15	19	neg	neg	36.6	0	0	0	0	0	1	1	12	1	6	4	3	2	3	2	2	0	0	0	2	3240	280	2	0	0	0
104906	18891	18413	16	19	neg	neg	36.5	0	0	0	0	0	1	1	12	1	6	4	3	2	3	2	2	0	0	0	2	3240	280	2	0	0	0
104906	18921	18413	17	19	neg	neg	37	0	0	0	0	0	1	1	12	1	6	4	3	2	3	2	2	0	0	0	2	3240	280	2	0	0	0
104906	18951	18413	18	19	neg	neg	37	0	0	0	0	0	1	1	12	1	6	4	3	2	3	2	2	0	0	0	2	3240	280	2	0	0	0
104906	18981	18413	19	19	neg	neg	37	0	0	0	0	0	1	1	12	1	6	4	3	2	3	2	2	0	0	0	2	3240	280	2	0	0	0
105304	18242	18214	1	24	neg	neg	36.6	0	0	0	0		1	1	4	1	0	0	1	1	1	1	1	0	0	0	1	2400	280	2	0	0	0
105304	18272	18214	2	24	neg	neg	36.7	0	0	0	0	0	1	1	4	1	0	0	1	1	1	1	1	0	0	0	1	2400	280	2	0	0	0
105304	18302	18214	3	24	neg	neg	36.8	0	0	0	0	0	1	1	4	1	0	0	1	1	1	1	1	0	0	0	1	2400	280	2	0	0	0
105304	18330	18214	4	24	neg	neg	36.5	0	0	0	0	0	1	1	4	1	0	0	1	1	1	1	1	0	0	0	1	2400	280	2	0	0	0
105304	18362	18214	5	24	neg	neg	36.7	0	0	0	0	0	1	1	4	1	0	0	1	1	1	1	1	0	0	0	1	2400	280	2	0	0	0
105304	18390	18214	6	24	f	f	36.9	2360	0	0	0	0	1	1	4	1	0	0	1	1	1	1	1	0	0	0	1	2400	280	2	0	0	1
105304	18422	18214	7	24	f	f	37.5	24	0	0	0	0	1	1	4	1	0	0	1	1	1	1	1	0	0	0	1	2400	280	2	0	0	1
105304	18452	18214	8	24	neg	neg	38.7	0	0	0	0	1	1	1	4	1	0	0	1	1	1	1	1	0	0	0	1	2400	280	2	0	0	0
105304	18482	18214	9	24	neg	neg	37.1	0	0	0	0	0	1	1	4	1	0	0	1	1	1	1	1	0	0	0	1	2400	280	2	0	0	0
105304	18512	18214	10	24	neg	neg	37	0	0	0	0	0	1	1	4	1	0	0	1	1	1	1	1	0	0	0	1	2400	280	2	0	0	0
105304	18542	18214	11	24	neg	neg	37.2	0	0	0	0	0	1	1	4	1	0	0	1	1	1	1	1	0	0	0	1	2400	280	2	0	0	0
105304	18572	18214	12	24	neg	neg	37	0	0	0	0	0	1	1	4	1	0	0	1	1	1	1	1	0	0	0	1	2400	280	2	0	0	0
105304	18602	18214	13	24	neg	neg	37	0	0	0	0	0	1	1	4	1	0	0	1	1	1	1	1	0	0	0	1	2400	280	2	0	0	0
105304	18632	18214	14	24	neg	neg	37.4	0	0	0	0	0	1	1	4	1	0	0	1	1	1	1	1	0	0	0	1	2400	280	2	0	0	0
105304	18662	18214	15	24	neg	neg	36.7	0	0	0	0	0	1	1	4	1	0	0	1	1	1	1	1	0	0	0	1	2400	280	2	0	0	0
105304	18692	18214	16	24	neg	neg	36.6	0	0	0	0	0	1	1	4	1	0	0	1	1	1	1	1	0	0	0	1	2400	280	2	0	0	0
105304	18722	18214	17	24	neg	neg	36.6	0	0	0	0	0	1	1	4	1	0	0	1	1	1	1	1	0	0	0	1	2400	280	2	0	0	0
105304	18752	18214	18	24	neg	neg	36.7	0	0	0	0	0	1	1	4	1	0	0	1	1	1	1	1	0	0	0	1	2400	280	2	0	0	0
105304	18782	18214	19	24	neg	neg	36.8	0	0	0	0	0	1	1	4	1	0	0	1	1	1	1	1	0	0	0	1	2400	280	2	0	0	0
105304	18812	18214	20	24	neg	neg	36.6	0	0	0	0	0	1	1	4	1	0	0	1	1	1	1	1	0	0	0	1	2400	280	2	0	0	0
105304	18842	18214	21	24	neg	neg	36.9	0	0	0	0	0	1	1	4	1	0	0	1	1	1	1	1	0	0	0	1	2400	280	2	0	0	0
105304	18872	18214	22	24	neg	neg	36.5	0	0	0	0	0	1	1	4	1	0	0	1	1	1	1	1	0	0	0	1	2400	280	2	0	0	0
105304	18902	18214	23	24	neg	neg	36.7	0	0	0	0	0	1	1	4	1	0	0	1	1	1	1	1	0	0	0	1	2400	280	2	0	0	0
105304	18932	18214	24	24	neg	neg	36.5	0	0	0	0	0	1	1	4	1	0	0	1	1	1	1	1	0	0	0	1	2400	280	2	0	0	0
105305	18452	18424	1	19	neg	neg	36.8	0	0	0	0		1	1	3	1	0	0	1	1	1	1	2	0	0	0	2	7040	0	3	0	0	0
105305	18461	18424	2	19	v	v	38.8	0	0	29614	5473	1	1	1	3	1	0	0	1	1	1	1	2	1	1	1	2	7040	0	3	0	0	0
105305	18512	18424	3	19	neg	neg	36.9	0	0	0	0	0	1	1	3	1	0	0	1	1	1	1	2	0	0	0	2	7040	0	3	0	0	0
105305	18542	18424	4	19	neg	neg	37	0	0	0	0	0	1	1	3	1	0	0	1	1	1	1	2	0	0	0	2	7040	0	3	0	0	0
105305	18572	18424	5	19	neg	neg	37	0	0	0	0	0	1	1	3	1	0	0	1	1	1	1	2	0	0	0	2	7040	0	3	0	0	0
105305	18602	18424	6	19	neg	neg	37.3	0	0	0	0	0	1	1	3	1	0	0	1	1	1	1	2	0	0	0	2	7040	0	3	0	0	0
105305	18632	18424	7	19	neg	neg	37	0	0	0	0	0	1	1	3	1	0	0	1	1	1	1	2	0	0	0	2	7040	0	3	0	0	0
105305	18662	18424	8	19	neg	neg	36.6	0	0	0	0	0	1	1	3	1	0	0	1	1	1	1	2	0	0	0	2	7040	0	3	0	0	0
105305	18692	18424	9	19	neg	neg	36.6	0	0	0	0	0	1	1	3	1	0	0	1	1	1	1	2	0	0	0	2	7040	0	3	0	0	0
105305	18722	18424	10	19	neg	neg	36.6	0	0	0	0	0	1	1	3	1	0	0	1	1	1	1	2	0	0	0	2	7040	0	3	0	0	0
105305	18752	18424	11	19	neg	neg	37.2	0	0	0	0	0	1	1	3	1	0	0	1	1	1	1	2	0	0	0	2	7040	0	3	0	0	0
105305	18782	18424	12	19	neg	neg	36.7	0	0	0	0	0	1	1	3	1	0	0	1	1	1	1	2	0	0	0	2	7040	0	3	0	0	0
105305	18812	18424	13	19	neg	neg	36.5	0	0	0	0	0	1	1	3	1	0	0	1	1	1	1	2	0	0	0	2	7040	0	3	0	0	0
105305	18842	18424	14	19	neg	neg	36.8	0	0	0	0	0	1	1	3	1	0	0	1	1	1	1	2	0	0	0	2	7040	0	3	0	0	0
105305	18872	18424	15	19	neg	neg	36.7	0	0	0	0	0	1	1	3	1	0	0	1	1	1	1	2	0	0	0	2	7040	0	3	0	0	0
105305	18902	18424	16	19	neg	neg	36.5	0	0	0	0	0	1	1	3	1	0	0	1	1	1	1	2	0	0	0	2	7040	0	3	0	0	0
105305	18932	18424	17	19	neg	neg	36.8	0	0	0	0	0	1	1	3	1	0	0	1	1	1	1	2	0	0	0	2	7040	0	3	0	0	0
105305	18962	18424	18	19	neg	neg	36.8	0	0	0	0	0	1	1	3	1	0	0	1	1	1	1	2	0	0	0	2	7040	0	3	0	0	0
105305	18981	18424	19	19	neg	neg	37	0	0	0	0	0	1	1	3	1	0	0	1	1	1	1	2	0	0	0	2	7040	0	3	0	0	0
105402	18059	18031	1	24	neg	neg	36.6	0	0	0	0		1	1	21	1	8	1	1	3	3	1	2	0	0	0	1	5200	1400	3	0	0	0
105402	18089	18031	2	24	neg	neg	36.8	0	0	0	0	0	1	1	21	1	8	1	1	3	3	1	2	0	0	0	1	5200	1400	3	0	0	0
105402	18119	18031	3	24	neg	neg	36.8	0	0	0	0	0	1	1	21	1	8	1	1	3	3	1	2	0	0	0	1	5200	1400	3	0	0	0
105402	18149	18031	4	24	neg	neg	36.5	0	0	0	0	0	1	1	21	1	8	1	1	3	3	1	2	0	0	0	1	5200	1400	3	0	0	0
105402	18179	18031	5	24	neg	neg	36.8	0	0	0	0	0	1	1	21	1	8	1	1	3	3	1	2	0	0	0	1	5200	1400	3	0	0	0
105402	18209	18031	6	24	neg	v	37.3	0	0	0	0	0	1	1	21	1	8	1	1	3	3	1	2	0	1	0	1	5200	1400	3	0	0	0
105402	18214	18031	7	24	v	v	38	0	0	880	760	0	1	1	21	1	8	1	1	3	3	1	2	1	1	1	1	5200	1400	3	0	0	0
105402	18269	18031	8	24	neg	neg	36.7	0	0	0	0	0	1	1	21	1	8	1	1	3	3	1	2	0	0	0	1	5200	1400	3	0	0	0
105402	18329	18031	10	24	neg	f	37	0	0	0	0	0	1	1	21	1	8	1	1	3	3	1	2	0	0	0	1	5200	1400	3	0	0	0
105402	18359	18031	11	24	neg	neg	36.7	0	0	0	0	0	1	1	21	1	8	1	1	3	3	1	2	0	0	0	1	5200	1400	3	0	0	0
105402	18389	18031	12	24	neg	neg	36.9	0	0	0	0	0	1	1	21	1	8	1	1	3	3	1	2	0	0	0	1	5200	1400	3	0	0	0
105402	18419	18031	13	24	f	f	38.1	24096	0	0	0	0	1	1	21	1	8	1	1	3	3	1	2	0	0	0	1	5200	1400	3	0	0	1
105402	18449	18031	14	24	neg	neg	36.8	0	0	0	0	0	1	1	21	1	8	1	1	3	3	1	2	0	0	0	1	5200	1400	3	0	0	0
105402	18479	18031	15	24	neg	v	37.3	0	0	0	0	0	1	1	21	1	8	1	1	3	3	1	2	0	1	0	1	5200	1400	3	0	0	0
105402	18509	18031	16	24	neg	neg	37.1	0	0	0	0	0	1	1	21	1	8	1	1	3	3	1	2	0	0	0	1	5200	1400	3	0	0	0
105402	18539	18031	17	24	neg	neg	37	0	0	0	0	0	1	1	21	1	8	1	1	3	3	1	2	0	0	0	1	5200	1400	3	0	0	0
105402	18569	18031	18	24	neg	neg	37	0	0	0	0	0	1	1	21	1	8	1	1	3	3	1	2	0	0	0	1	5200	1400	3	0	0	0
105402	18601	18031	19	24	v	v	37	0	0	560	0	0	1	1	21	1	8	1	1	3	3	1	2	1	1	0	1	5200	1400	3	0	0	0
105402	18629	18031	20	24	neg	neg	37	0	0	0	0	0	1	1	21	1	8	1	1	3	3	1	2	0	0	0	1	5200	1400	3	0	0	0
105402	18659	18031	21	24	neg	neg	37	0	0	0	0	0	1	1	21	1	8	1	1	3	3	1	2	0	0	0	1	5200	1400	3	0	0	0
105402	18689	18031	22	24	neg	neg	36.6	0	0	0	0	0	1	1	21	1	8	1	1	3	3	1	2	0	0	0	1	5200	1400	3	0	0	0
105402	18719	18031	23	24	neg	neg	36.7	0	0	0	0	0	1	1	21	1	8	1	1	3	3	1	2	0	0	0	1	5200	1400	3	0	0	0
105402	18749	18031	24	24	neg	neg	37.2	0	0	0	0	0	1	1	21	1	8	1	1	3	3	1	2	0	0	0	1	5200	1400	3	0	0	0
105403	18483	18455	1	17	neg	neg	37.5	0	0	0	0		1	2	15	1	9	4	1	2	3	1	2	0	0	0	2	7520	440	3	0	0	0
105403	18513	18455	2	17	neg	neg	37	0	0	0	0	0	1	2	15	1	9	4	1	2	3	1	2	0	0	0	2	7520	440	3	0	0	0
105403	18543	18455	3	17	neg	neg	37	0	0	0	0	0	1	2	15	1	9	4	1	2	3	1	2	0	0	0	2	7520	440	3	0	0	0
105403	18573	18455	4	17	neg	neg	37	0	0	0	0	0	1	2	15	1	9	4	1	2	3	1	2	0	0	0	2	7520	440	3	0	0	0
105403	18603	18455	5	17	neg	neg	36.8	0	0	0	0	0	1	2	15	1	9	4	1	2	3	1	2	0	0	0	2	7520	440	3	0	0	0
105403	18633	18455	6	17	neg	neg	37	0	0	0	0	0	1	2	15	1	9	4	1	2	3	1	2	0	0	0	2	7520	440	3	0	0	0
105403	18663	18455	7	17	neg	neg	36.8	0	0	0	0	0	1	2	15	1	9	4	1	2	3	1	2	0	0	0	2	7520	440	3	0	0	0
105403	18693	18455	8	17	neg	neg	36.8	0	0	0	0	0	1	2	15	1	9	4	1	2	3	1	2	0	0	0	2	7520	440	3	0	0	0
105403	18723	18455	9	17	neg	neg	36.6	0	0	0	0	0	1	2	15	1	9	4	1	2	3	1	2	0	0	0	2	7520	440	3	0	0	0
105403	18753	18455	10	17	neg	neg	36.7	0	0	0	0	0	1	2	15	1	9	4	1	2	3	1	2	0	0	0	2	7520	440	3	0	0	0
105403	18783	18455	11	17	neg	neg	36.6	0	0	0	0	0	1	2	15	1	9	4	1	2	3	1	2	0	0	0	2	7520	440	3	0	0	0
105403	18813	18455	12	17	neg	neg	36.8	0	0	0	0	0	1	2	15	1	9	4	1	2	3	1	2	0	0	0	2	7520	440	3	0	0	0
105403	18843	18455	13	17	neg	neg	37	0	0	0	0	0	1	2	15	1	9	4	1	2	3	1	2	0	0	0	2	7520	440	3	0	0	0
105403	18873	18455	14	17	neg	neg	36.5	0	0	0	0	0	1	2	15	1	9	4	1	2	3	1	2	0	0	0	2	7520	440	3	0	0	0
105403	18903	18455	15	17	neg	neg	36.9	0	0	0	0	0	1	2	15	1	9	4	1	2	3	1	2	0	0	0	2	7520	440	3	0	0	0
105403	18952	18455	16	17	neg	neg	36.6	0	0	0	0	0	1	2	15	1	9	4	1	2	3	1	2	0	0	0	2	7520	440	3	0	0	0
105403	18963	18455	17	17	neg	neg	37	0	0	0	0	0	1	2	15	1	9	4	1	2	3	1	2	0	0	0	2	7520	440	3	0	0	0
105705	18131	18103	1	24	neg	neg	36.8	0	0	0	0		1	2	5	1	0	0	3	1	1	1	2	0	0	0	1	520	0	1	0	0	0
105705	18161	18103	2	24	neg	neg	36.7	0	0	0	0	0	1	2	5	1	0	0	3	1	1	1	2	0	0	0	1	520	0	1	0	0	0
105705	18191	18103	3	24	neg	neg	36.7	0	0	0	0	0	1	2	5	1	0	0	3	1	1	1	2	0	0	0	1	520	0	1	0	0	0
105705	18221	18103	4	24	neg	neg	37.1	0	0	0	0	0	1	2	5	1	0	0	3	1	1	1	2	0	0	0	1	520	0	1	0	0	0
105705	18251	18103	5	24	neg	neg	37	0	0	0	0	0	1	2	5	1	0	0	3	1	1	1	2	0	0	0	1	520	0	1	0	0	0
105705	18281	18103	6	24	neg	neg	36.7	0	0	0	0	0	1	2	5	1	0	0	3	1	1	1	2	0	0	0	1	520	0	1	0	0	0
105705	18311	18103	7	24	v	v	37	0	0	1320	400	0	1	2	5	1	0	0	3	1	1	1	2	1	1	0	1	520	0	1	0	0	0
105705	18341	18103	8	24	neg	neg	37	0	0	0	0	0	1	2	5	1	0	0	3	1	1	1	2	0	0	0	1	520	0	1	0	0	0
105705	18371	18103	9	24	neg	v	37.4	0	0	0	0	0	1	2	5	1	0	0	3	1	1	1	2	0	1	0	1	520	0	1	0	0	0
105705	18401	18103	10	24	neg	neg	38.5	0	0	0	0	0	1	2	5	1	0	0	3	1	1	1	2	0	0	0	1	520	0	1	0	0	0
105705	18431	18103	11	24	neg	neg	37	0	0	0	0	0	1	2	5	1	0	0	3	1	1	1	2	0	0	0	1	520	0	1	0	0	0
105705	18461	18103	12	24	v	v	37.1	0	0	1040	80	0	1	2	5	1	0	0	3	1	1	1	2	1	1	0	1	520	0	1	0	0	0
105705	18491	18103	13	24	neg	neg	37	0	0	0	0	0	1	2	5	1	0	0	3	1	1	1	2	0	0	0	1	520	0	1	0	0	0
105705	18521	18103	14	24	neg	v	36.5	0	0	0	0	0	1	2	5	1	0	0	3	1	1	1	2	0	1	0	1	520	0	1	0	0	0
105705	18551	18103	15	24	neg	v	36.8	0	0	0	0	0	1	2	5	1	0	0	3	1	1	1	2	0	1	0	1	520	0	1	0	0	0
105705	18581	18103	16	24	neg	neg	36.5	0	0	0	0	1	1	2	5	1	0	0	3	1	1	1	2	0	0	0	1	520	0	1	0	0	0
105705	18611	18103	17	24	neg	v	37	0	0	0	0	0	1	2	5	1	0	0	3	1	1	1	2	0	1	0	1	520	0	1	0	0	0
105705	18641	18103	18	24	neg	v	37.5	0	0	0	0	0	1	2	5	1	0	0	3	1	1	1	2	0	1	0	1	520	0	1	0	0	0
105705	18671	18103	19	24	neg	v	36.7	0	0	0	0	0	1	2	5	1	0	0	3	1	1	1	2	0	1	0	1	520	0	1	0	0	0
105705	18701	18103	20	24	neg	v	36.6	0	0	0	0	0	1	2	5	1	0	0	3	1	1	1	2	0	1	0	1	520	0	1	0	0	0
105705	18731	18103	21	24	neg	v	36.7	0	0	0	0	0	1	2	5	1	0	0	3	1	1	1	2	0	1	0	1	520	0	1	0	0	0
105705	18761	18103	22	24	neg	neg	36.9	0	0	0	0	0	1	2	5	1	0	0	3	1	1	1	2	0	0	0	1	520	0	1	0	0	0
105705	18791	18103	23	24	neg	v	37	0	0	0	0	0	1	2	5	1	0	0	3	1	1	1	2	0	1	0	1	520	0	1	0	0	0
105705	18821	18103	24	24	neg	neg	37.2	0	0	0	0	0	1	2	5	1	0	0	3	1	1	1	2	0	0	0	1	520	0	1	0	0	0
105901	18573	18545	1	14	neg	neg	37	0	0	0	0		1	1	41	1	9	1	3	4	3	2	1	0	0	0	2	1569	2105	2	0	0	0
105901	18605	18545	2	14	v	v	36.8	0	0	6480	360	1	1	1	41	1	9	1	3	4	3	2	1	1	1	0	2	1569	2105	2	0	0	0
105901	18633	18545	3	14	neg	neg	36.6	0	0	0	0	0	1	1	41	1	9	1	3	4	3	2	1	0	0	0	2	1569	2105	2	0	0	0
105901	18663	18545	4	14	neg	neg	36.7	0	0	0	0	0	1	1	41	1	9	1	3	4	3	2	1	0	0	0	2	1569	2105	2	0	0	0
105901	18683	18545	5	14	v	v	37.5	0	0	5320	0	0	1	1	41	1	9	1	3	4	3	2	1	1	1	1	2	1569	2105	2	0	0	0
105901	18723	18545	6	14	neg	v	36.8	0	0	0	0	0	1	1	41	1	9	1	3	4	3	2	1	0	1	0	2	1569	2105	2	0	1	0
105901	18753	18545	7	14	neg	neg	37	0	0	0	0	0	1	1	41	1	9	1	3	4	3	2	1	0	0	0	2	1569	2105	2	0	0	0
105901	18768	18545	8	14	v	v	37.4	0	0	2240	80	1	1	1	41	1	9	1	3	4	3	2	1	1	1	0	2	1569	2105	2	0	0	0
105901	18813	18545	9	14	neg	neg	37	0	0	0	0	0	1	1	41	1	9	1	3	4	3	2	1	0	0	0	2	1569	2105	2	0	0	0
105901	18843	18545	10	14	neg	neg	36.5	0	0	0	0	0	1	1	41	1	9	1	3	4	3	2	1	0	0	0	2	1569	2105	2	0	0	0
105901	18873	18545	11	14	neg	neg	36.6	0	0	0	0	0	1	1	41	1	9	1	3	4	3	2	1	0	0	0	2	1569	2105	2	0	0	0
105901	18903	18545	12	14	neg	neg	36.6	0	0	0	0	0	1	1	41	1	9	1	3	4	3	2	1	0	0	0	2	1569	2105	2	0	0	0
105901	18933	18545	13	14	neg	neg	36.8	0	0	0	0	0	1	1	41	1	9	1	3	4	3	2	1	0	0	0	2	1569	2105	2	0	0	0
105901	18963	18545	14	14	neg	v	36.9	0	0	0	0	0	1	1	41	1	9	1	3	4	3	2	1	0	1	0	2	1569	2105	2	0	0	0
105902	18081	18053	1	24	neg	neg	36.8	0	0	0	0		1	2	21	1	9	1	3	3	3	2	2	0	0	0	1	2200	224	2	0	0	0
105902	18111	18053	2	24	neg	neg	36.8	0	0	0	0	0	1	2	21	1	9	1	3	3	3	2	2	0	0	0	1	2200	224	2	0	0	0
105902	18124	18053	3	24	f	f	38.5	53333	0	0	0	0	1	2	21	1	9	1	3	3	3	2	2	0	0	0	1	2200	224	2	0	0	1
105902	18171	18053	4	24	neg	neg	36.6	0	0	0	0	0	1	2	21	1	9	1	3	3	3	2	2	0	0	0	1	2200	224	2	0	0	0
105902	18201	18053	5	24	neg	neg	36.5	0	0	0	0	0	1	2	21	1	9	1	3	3	3	2	2	0	0	0	1	2200	224	2	0	0	0
105902	18231	18053	6	24	neg	neg	36.9	0	0	0	0	0	1	2	21	1	9	1	3	3	3	2	2	0	0	0	1	2200	224	2	0	0	0
105902	18261	18053	7	24	neg	neg	36.8	0	0	0	0	0	1	2	21	1	9	1	3	3	3	2	2	0	0	0	1	2200	224	2	0	0	0
105902	18285	18053	8	24	f	f	38.7	24880	0	0	0	0	1	2	21	1	9	1	3	3	3	2	2	0	0	0	1	2200	224	2	0	0	1
105902	18321	18053	9	24	neg	neg	37	0	0	0	0	0	1	2	21	1	9	1	3	3	3	2	2	0	0	0	1	2200	224	2	0	0	0
105902	18351	18053	10	24	neg	neg	36.7	0	0	0	0	0	1	2	21	1	9	1	3	3	3	2	2	0	0	0	1	2200	224	2	0	0	0
105902	18373	18053	11	24	f	f	37.5	3040	680	0	0	0	1	2	21	1	9	1	3	3	3	2	2	0	0	0	1	2200	224	2	0	0	1
105902	18411	18053	12	24	neg	neg	36.8	0	0	0	0	0	1	2	21	1	9	1	3	3	3	2	2	0	0	0	1	2200	224	2	0	0	0
105902	18441	18053	13	24	neg	neg	37.3	0	0	0	0	0	1	2	21	1	9	1	3	3	3	2	2	0	0	0	1	2200	224	2	0	0	0
105902	18471	18053	14	24	neg	neg	37.1	0	0	0	0	0	1	2	21	1	9	1	3	3	3	2	2	0	0	0	1	2200	224	2	0	0	0
105902	18501	18053	15	24	neg	neg	36.9	0	0	0	0	0	1	2	21	1	9	1	3	3	3	2	2	0	0	0	1	2200	224	2	0	0	0
105902	18531	18053	16	24	v	v	38	0	0	760	6280	1	1	2	21	1	9	1	3	3	3	2	2	1	1	1	1	2200	224	2	0	0	0
105902	18561	18053	17	24	neg	neg	37	0	0	0	0	0	1	2	21	1	9	1	3	3	3	2	2	0	0	0	1	2200	224	2	0	0	0
105902	18591	18053	18	24	neg	neg	37	0	0	0	0	0	1	2	21	1	9	1	3	3	3	2	2	0	0	0	1	2200	224	2	0	0	0
105902	18621	18053	19	24	neg	neg	37.1	0	0	0	0	0	1	2	21	1	9	1	3	3	3	2	2	0	0	0	1	2200	224	2	0	0	0
105902	18651	18053	20	24	neg	neg	36.7	0	0	0	0	0	1	2	21	1	9	1	3	3	3	2	2	0	0	0	1	2200	224	2	0	0	0
105902	18681	18053	21	24	neg	neg	36.6	0	0	0	0	0	1	2	21	1	9	1	3	3	3	2	2	0	0	0	1	2200	224	2	0	0	0
105902	18711	18053	22	24	neg	neg	36.6	0	0	0	0	0	1	2	21	1	9	1	3	3	3	2	2	0	0	0	1	2200	224	2	0	0	0
105902	18741	18053	23	24	neg	neg	36.7	0	0	0	0	0	1	2	21	1	9	1	3	3	3	2	2	0	0	0	1	2200	224	2	0	0	0
105902	18771	18053	24	24	neg	neg	36.7	0	0	0	0	0	1	2	21	1	9	1	3	3	3	2	2	0	0	0	1	2200	224	2	0	0	0
106003	18054	18026	1	24	neg	neg	37	0	0	0	0		1	1	21	1	9	1	3	3	3	2	2	0	0	0	1	4000	272	2	0	0	0
106003	18084	18026	2	24	neg	neg	36.8	0	0	0	0	0	1	1	21	1	9	1	3	3	3	2	2	0	0	0	1	4000	272	2	0	0	0
106003	18114	18026	3	24	neg	neg	36.8	0	0	0	0	0	1	1	21	1	9	1	3	3	3	2	2	0	0	0	1	4000	272	2	0	0	0
106003	18144	18026	4	24	neg	neg	36.5	0	0	0	0	0	1	1	21	1	9	1	3	3	3	2	2	0	0	0	1	4000	272	2	0	0	0
106003	18174	18026	5	24	neg	neg	36.8	0	0	0	0	0	1	1	21	1	9	1	3	3	3	2	2	0	0	0	1	4000	272	2	0	0	0
106003	18204	18026	6	24	neg	neg	37.5	0	0	0	0	0	1	1	21	1	9	1	3	3	3	2	2	0	0	0	1	4000	272	2	0	0	0
106003	18234	18026	7	24	neg	neg	37.2	0	0	0	0	0	1	1	21	1	9	1	3	3	3	2	2	0	0	0	1	4000	272	2	0	0	0
106003	18264	18026	8	24	f	f	40.2	210526	0	0	0	0	1	1	21	1	9	1	3	3	3	2	2	0	0	0	1	4000	272	2	0	0	1
106003	18294	18026	9	24	neg	neg	36.8	0	0	0	0	0	1	1	21	1	9	1	3	3	3	2	2	0	0	0	1	4000	272	2	0	0	0
106003	18324	18026	10	24	neg	neg	37.1	0	0	0	0	0	1	1	21	1	9	1	3	3	3	2	2	0	0	0	1	4000	272	2	0	0	0
106003	18354	18026	11	24	neg	neg	37.3	0	0	0	0	0	1	1	21	1	9	1	3	3	3	2	2	0	0	0	1	4000	272	2	0	0	0
106003	18384	18026	12	24	neg	neg	36.7	0	0	0	0	0	1	1	21	1	9	1	3	3	3	2	2	0	0	0	1	4000	272	2	0	0	0
106003	18414	18026	13	24	neg	neg	36.9	0	0	0	0	0	1	1	21	1	9	1	3	3	3	2	2	0	0	0	1	4000	272	2	0	0	0
106003	18444	18026	14	24	v	v	36.9	0	0	1200	40	0	1	1	21	1	9	1	3	3	3	2	2	1	1	0	1	4000	272	2	0	0	0
106003	18475	18026	15	24	f	fv	39.2	3720	0	0	0	1	1	1	21	1	9	1	3	3	3	2	2	0	1	0	1	4000	272	2	0	1	1
106003	18504	18026	16	24	neg	v	37	0	0	0	0	0	1	1	21	1	9	1	3	3	3	2	2	0	1	0	1	4000	272	2	1	1	0
106003	18530	18026	17	24	v	v	38	0	0	2185	5039	1	1	1	21	1	9	1	3	3	3	2	2	1	1	1	1	4000	272	2	0	0	0
106003	18564	18026	18	24	neg	neg	37	0	0	0	0	0	1	1	21	1	9	1	3	3	3	2	2	0	0	0	1	4000	272	2	0	0	0
106003	18594	18026	19	24	neg	neg	36.7	0	0	0	0	0	1	1	21	1	9	1	3	3	3	2	2	0	0	0	1	4000	272	2	0	0	0
106003	18624	18026	20	24	neg	neg	36.8	0	0	0	0	0	1	1	21	1	9	1	3	3	3	2	2	0	0	0	1	4000	272	2	0	0	0
106003	18654	18026	21	24	neg	neg	36.7	0	0	0	0	0	1	1	21	1	9	1	3	3	3	2	2	0	0	0	1	4000	272	2	0	0	0
106003	18684	18026	22	24	neg	neg	36.7	0	0	0	0	0	1	1	21	1	9	1	3	3	3	2	2	0	0	0	1	4000	272	2	0	0	0
106003	18714	18026	23	24	neg	neg	36.6	0	0	0	0	0	1	1	21	1	9	1	3	3	3	2	2	0	0	0	1	4000	272	2	0	0	0
106003	18744	18026	24	24	neg	neg	36.8	0	0	0	0	0	1	1	21	1	9	1	3	3	3	2	2	0	0	0	1	4000	272	2	0	0	0
106102	18427	18399	1	19	neg	neg	37.2	0	0	0	0		1	2	20	1	4	1	1	3	2	2	2	0	0	0	2	1760	120	2	0	0	0
106102	18457	18399	2	19	neg	neg	37.5	0	0	0	0	0	1	2	20	1	4	1	1	3	2	2	2	0	0	0	2	1760	120	2	0	0	0
106102	18487	18399	3	19	neg	neg	37.4	0	0	0	0	0	1	2	20	1	4	1	1	3	2	2	2	0	0	0	2	1760	120	2	0	0	0
106102	18517	18399	4	19	neg	neg	37.1	0	0	0	0	0	1	2	20	1	4	1	1	3	2	2	2	0	0	0	2	1760	120	2	0	0	0
106102	18547	18399	5	19	neg	neg	37	0	0	0	0	0	1	2	20	1	4	1	1	3	2	2	2	0	0	0	2	1760	120	2	0	0	0
106102	18577	18399	6	19	neg	neg	37	0	0	0	0	0	1	2	20	1	4	1	1	3	2	2	2	0	0	0	2	1760	120	2	0	0	0
106102	18607	18399	7	19	neg	neg	37	0	0	0	0	0	1	2	20	1	4	1	1	3	2	2	2	0	0	0	2	1760	120	2	0	0	0
106102	18637	18399	8	19	neg	neg	37	0	0	0	0	0	1	2	20	1	4	1	1	3	2	2	2	0	0	0	2	1760	120	2	0	0	0
106102	18667	18399	9	19	neg	neg	36.7	0	0	0	0	0	1	2	20	1	4	1	1	3	2	2	2	0	0	0	2	1760	120	2	0	0	0
106102	18697	18399	10	19	neg	neg	36.7	0	0	0	0	0	1	2	20	1	4	1	1	3	2	2	2	0	0	0	2	1760	120	2	0	0	0
106102	18727	18399	11	19	neg	neg	36.6	0	0	0	0	0	1	2	20	1	4	1	1	3	2	2	2	0	0	0	2	1760	120	2	0	0	0
106102	18757	18399	12	19	neg	neg	36.9	0	0	0	0	0	1	2	20	1	4	1	1	3	2	2	2	0	0	0	2	1760	120	2	0	0	0
106102	18787	18399	13	19	neg	neg	36.8	0	0	0	0	0	1	2	20	1	4	1	1	3	2	2	2	0	0	0	2	1760	120	2	0	0	0
106102	18817	18399	14	19	neg	neg	36.8	0	0	0	0	0	1	2	20	1	4	1	1	3	2	2	2	0	0	0	2	1760	120	2	0	0	0
106102	18847	18399	15	19	neg	neg	37	0	0	0	0	0	1	2	20	1	4	1	1	3	2	2	2	0	0	0	2	1760	120	2	0	0	0
106102	18877	18399	16	19	neg	neg	36.5	0	0	0	0	0	1	2	20	1	4	1	1	3	2	2	2	0	0	0	2	1760	120	2	0	0	0
106102	18907	18399	17	19	neg	neg	37	0	0	0	0	0	1	2	20	1	4	1	1	3	2	2	2	0	0	0	2	1760	120	2	0	0	0
106102	18937	18399	18	19	neg	neg	36.6	0	0	0	0	0	1	2	20	1	4	1	1	3	2	2	2	0	0	0	2	1760	120	2	0	0	0
106102	18967	18399	19	19	neg	neg	36.7	0	0	0	0	0	1	2	20	1	4	1	1	3	2	2	2	0	0	0	2	1760	120	2	0	0	0
106301	18407	18379	1	20	neg	neg	36.7	0	0	0	0		1	1	28	1	4	1	1	3	2	2	2	0	0	0	2	16360	1400	3	0	0	0
106301	18437	18379	2	20	f	f	37.3	11764	0	0	0	1	1	1	28	1	4	1	1	3	2	2	2	0	0	0	2	16360	1400	3	0	0	1
106301	18467	18379	3	20	neg	neg	37	0	0	0	0	0	1	1	28	1	4	1	1	3	2	2	2	0	0	0	2	16360	1400	3	0	0	0
106301	18497	18379	4	20	neg	neg	36.6	0	0	0	0	0	1	1	28	1	4	1	1	3	2	2	2	0	0	0	2	16360	1400	3	0	0	0
106301	18527	18379	5	20	neg	neg	36.5	0	0	0	0	0	1	1	28	1	4	1	1	3	2	2	2	0	0	0	2	16360	1400	3	0	0	0
106301	18557	18379	6	20	neg	neg	37	0	0	0	0	0	1	1	28	1	4	1	1	3	2	2	2	0	0	0	2	16360	1400	3	0	0	0
106301	18587	18379	7	20	neg	neg	36.8	0	0	0	0	0	1	1	28	1	4	1	1	3	2	2	2	0	0	0	2	16360	1400	3	0	0	0
106301	18617	18379	8	20	neg	neg	37	0	0	0	0	0	1	1	28	1	4	1	1	3	2	2	2	0	0	0	2	16360	1400	3	0	0	0
106301	18647	18379	9	20	neg	neg	36.8	0	0	0	0	0	1	1	28	1	4	1	1	3	2	2	2	0	0	0	2	16360	1400	3	0	0	0
106301	18677	18379	10	20	neg	neg	36.6	0	0	0	0	0	1	1	28	1	4	1	1	3	2	2	2	0	0	0	2	16360	1400	3	0	0	0
106301	18707	18379	11	20	neg	neg	36.6	0	0	0	0	0	1	1	28	1	4	1	1	3	2	2	2	0	0	0	2	16360	1400	3	0	0	0
106301	18737	18379	12	20	neg	neg	36.6	0	0	0	0	0	1	1	28	1	4	1	1	3	2	2	2	0	0	0	2	16360	1400	3	0	0	0
106301	18767	18379	13	20	neg	v	36.8	0	0	0	0	0	1	1	28	1	4	1	1	3	2	2	2	0	1	0	2	16360	1400	3	0	0	0
106301	18797	18379	14	20	neg	neg	36.7	0	0	0	0	0	1	1	28	1	4	1	1	3	2	2	2	0	0	0	2	16360	1400	3	0	0	0
106301	18827	18379	15	20	neg	neg	36.6	0	0	0	0	0	1	1	28	1	4	1	1	3	2	2	2	0	0	0	2	16360	1400	3	0	0	0
106301	18857	18379	16	20	neg	neg	37	0	0	0	0	0	1	1	28	1	4	1	1	3	2	2	2	0	0	0	2	16360	1400	3	0	0	0
106301	18887	18379	17	20	neg	neg	36.8	0	0	0	0	0	1	1	28	1	4	1	1	3	2	2	2	0	0	0	2	16360	1400	3	0	0	0
106301	18917	18379	18	20	neg	neg	36.8	0	0	0	0	0	1	1	28	1	4	1	1	3	2	2	2	0	0	0	2	16360	1400	3	0	0	0
106301	18959	18379	19	20	neg	neg	36.8	0	0	0	0	0	1	1	28	1	4	1	1	3	2	2	2	0	0	0	2	16360	1400	3	0	0	0
106301	18977	18379	20	20	neg	neg	36.8	0	0	0	0	0	1	1	28	1	4	1	1	3	2	2	2	0	0	0	2	16360	1400	3	0	0	0
106303	18455	18427	1	18	neg	neg	37.1	0	0	0	0		1	2	3	1	0	0	1	1	1	2	2	0	0	0	2	3400	2240	2	0	0	0
106303	18485	18427	2	18	neg	neg	37.5	0	0	0	0	0	1	2	3	1	0	0	1	1	1	2	2	0	0	0	2	3400	2240	2	0	0	0
106303	18515	18427	3	18	neg	neg	36.7	0	0	0	0	0	1	2	3	1	0	0	1	1	1	2	2	0	0	0	2	3400	2240	2	0	0	0
106303	18545	18427	4	18	neg	neg	38	0	0	0	0	0	1	2	3	1	0	0	1	1	1	2	2	0	0	0	2	3400	2240	2	0	0	0
106303	18575	18427	5	18	neg	neg	37	0	0	0	0	0	1	2	3	1	0	0	1	1	1	2	2	0	0	0	2	3400	2240	2	0	0	0
106303	18605	18427	6	18	neg	neg	37	0	0	0	0	0	1	2	3	1	0	0	1	1	1	2	2	0	0	0	2	3400	2240	2	0	0	0
106303	18635	18427	7	18	neg	neg	36.9	0	0	0	0	0	1	2	3	1	0	0	1	1	1	2	2	0	0	0	2	3400	2240	2	0	0	0
106303	18665	18427	8	18	neg	neg	36.6	0	0	0	0	0	1	2	3	1	0	0	1	1	1	2	2	0	0	0	2	3400	2240	2	0	0	0
106303	18695	18427	9	18	neg	neg	36.6	0	0	0	0	0	1	2	3	1	0	0	1	1	1	2	2	0	0	0	2	3400	2240	2	0	0	0
106303	18725	18427	10	18	neg	neg	36.5	0	0	0	0	0	1	2	3	1	0	0	1	1	1	2	2	0	0	0	2	3400	2240	2	0	0	0
106303	18755	18427	11	18	neg	neg	37	0	0	0	0	0	1	2	3	1	0	0	1	1	1	2	2	0	0	0	2	3400	2240	2	0	0	0
106303	18785	18427	12	18	neg	neg	36.7	0	0	0	0	0	1	2	3	1	0	0	1	1	1	2	2	0	0	0	2	3400	2240	2	0	0	0
106303	18815	18427	13	18	neg	neg	36.5	0	0	0	0	0	1	2	3	1	0	0	1	1	1	2	2	0	0	0	2	3400	2240	2	0	0	0
106303	18847	18427	14	18	neg	neg	37.4	0	0	0	0	0	1	2	3	1	0	0	1	1	1	2	2	0	0	0	2	3400	2240	2	0	0	0
106303	18875	18427	15	18	neg	neg	37	0	0	0	0	0	1	2	3	1	0	0	1	1	1	2	2	0	0	0	2	3400	2240	2	0	0	0
106303	18905	18427	16	18	neg	neg	36.5	0	0	0	0	0	1	2	3	1	0	0	1	1	1	2	2	0	0	0	2	3400	2240	2	0	0	0
106303	18935	18427	17	18	neg	neg	36.8	0	0	0	0	0	1	2	3	1	0	0	1	1	1	2	2	0	0	0	2	3400	2240	2	0	0	0
106303	18965	18427	18	18	neg	neg	37	0	0	0	0	0	1	2	3	1	0	0	1	1	1	2	2	0	0	0	2	3400	2240	2	0	0	0
106501	18471	18443	1	18	neg	neg	36.6	0	0	0	0		1	1	34	1	2	1	3	4	2	1	2	0	0	0	2	6400	480	3	0	0	0
106501	18500	18443	2	18	neg	neg	36.5	0	0	0	0	0	1	1	34	1	2	1	3	4	2	1	2	0	0	0	2	6400	480	3	0	0	0
106501	18530	18443	3	18	neg	neg	37	0	0	0	0	0	1	1	34	1	2	1	3	4	2	1	2	0	0	0	2	6400	480	3	0	0	0
106501	18560	18443	4	18	neg	neg	37	0	0	0	0	0	1	1	34	1	2	1	3	4	2	1	2	0	0	0	2	6400	480	3	0	0	0
106501	18590	18443	5	18	neg	neg	37.2	0	0	0	0	0	1	1	34	1	2	1	3	4	2	1	2	0	0	0	2	6400	480	3	0	0	0
106501	18620	18443	6	18	neg	neg	36.9	0	0	0	0	0	1	1	34	1	2	1	3	4	2	1	2	0	0	0	2	6400	480	3	0	0	0
106501	18650	18443	7	18	neg	neg	36.7	0	0	0	0	0	1	1	34	1	2	1	3	4	2	1	2	0	0	0	2	6400	480	3	0	0	0
106501	18680	18443	8	18	neg	neg	36.6	0	0	0	0	0	1	1	34	1	2	1	3	4	2	1	2	0	0	0	2	6400	480	3	0	0	0
106501	18710	18443	9	18	neg	neg	36.5	0	0	0	0	0	1	1	34	1	2	1	3	4	2	1	2	0	0	0	2	6400	480	3	0	0	0
106501	18740	18443	10	18	neg	neg	36.7	0	0	0	0	0	1	1	34	1	2	1	3	4	2	1	2	0	0	0	2	6400	480	3	0	0	0
106501	18770	18443	11	18	neg	neg	36.6	0	0	0	0	0	1	1	34	1	2	1	3	4	2	1	2	0	0	0	2	6400	480	3	0	0	0
106501	18800	18443	12	18	neg	neg	37	0	0	0	0	0	1	1	34	1	2	1	3	4	2	1	2	0	0	0	2	6400	480	3	0	0	0
106501	18830	18443	13	18	neg	neg	37	0	0	0	0	0	1	1	34	1	2	1	3	4	2	1	2	0	0	0	2	6400	480	3	0	0	0
106501	18860	18443	14	18	neg	neg	36.7	0	0	0	0	0	1	1	34	1	2	1	3	4	2	1	2	0	0	0	2	6400	480	3	0	0	0
106501	18890	18443	15	18	neg	neg	36.8	0	0	0	0	0	1	1	34	1	2	1	3	4	2	1	2	0	0	0	2	6400	480	3	0	0	0
106501	18920	18443	16	18	neg	neg	36.8	0	0	0	0	0	1	1	34	1	2	1	3	4	2	1	2	0	0	0	2	6400	480	3	0	0	0
106501	18950	18443	17	18	neg	neg	36.8	0	0	0	0	0	1	1	34	1	2	1	3	4	2	1	2	0	0	0	2	6400	480	3	0	0	0
106501	18980	18443	18	18	neg	neg	36.6	0	0	0	0	0	1	1	34	1	2	1	3	4	2	1	2	0	0	0	2	6400	480	3	0	0	0
106503	18502	18474	1	17	neg	neg	36.9	0	0	0	0		1	1	10	1	3	4	3	2	2	1	2	0	0	0	2	3360	880	2	0	0	0
106503	18532	18474	2	17	neg	neg	37.1	0	0	0	0	0	1	1	10	1	3	4	3	2	2	1	2	0	0	0	2	3360	880	2	0	0	0
106503	18562	18474	3	17	v	v	37	0	0	560	160	0	1	1	10	1	3	4	3	2	2	1	2	1	1	0	2	3360	880	2	0	0	0
106503	18592	18474	4	17	neg	neg	36.6	0	0	0	0	0	1	1	10	1	3	4	3	2	2	1	2	0	0	0	2	3360	880	2	0	0	0
106503	18622	18474	5	17	neg	neg	36.9	0	0	0	0	0	1	1	10	1	3	4	3	2	2	1	2	0	0	0	2	3360	880	2	0	0	0
106503	18652	18474	6	17	neg	f	37	0	0	0	0	0	1	1	10	1	3	4	3	2	2	1	2	0	0	0	2	3360	880	2	0	0	0
106503	18682	18474	7	17	neg	neg	36.6	0	0	0	0	0	1	1	10	1	3	4	3	2	2	1	2	0	0	0	2	3360	880	2	0	0	0
106503	18712	18474	8	17	neg	neg	36.6	0	0	0	0	0	1	1	10	1	3	4	3	2	2	1	2	0	0	0	2	3360	880	2	0	0	0
106503	18742	18474	9	17	neg	neg	37	0	0	0	0	0	1	1	10	1	3	4	3	2	2	1	2	0	0	0	2	3360	880	2	0	0	0
106503	18772	18474	10	17	neg	neg	36.8	0	0	0	0	0	1	1	10	1	3	4	3	2	2	1	2	0	0	0	2	3360	880	2	0	0	0
106503	18802	18474	11	17	neg	neg	36.7	0	0	0	0	0	1	1	10	1	3	4	3	2	2	1	2	0	0	0	2	3360	880	2	0	0	0
106503	18832	18474	12	17	neg	neg	36.8	0	0	0	0	0	1	1	10	1	3	4	3	2	2	1	2	0	0	0	2	3360	880	2	0	0	0
106503	18862	18474	13	17	neg	neg	36.6	0	0	0	0	0	1	1	10	1	3	4	3	2	2	1	2	0	0	0	2	3360	880	2	0	0	0
106503	18892	18474	14	17	neg	neg	36.9	0	0	0	0	0	1	1	10	1	3	4	3	2	2	1	2	0	0	0	2	3360	880	2	0	0	0
106503	18922	18474	15	17	neg	neg	36.8	0	0	0	0	0	1	1	10	1	3	4	3	2	2	1	2	0	0	0	2	3360	880	2	0	0	0
106503	18951	18474	16	17	neg	neg	36.8	0	0	0	0	0	1	1	10	1	3	4	3	2	2	1	2	0	0	0	2	3360	880	2	0	0	0
106503	18982	18474	17	17	neg	neg	36.7	0	0	0	0	0	1	1	10	1	3	4	3	2	2	1	2	0	0	0	2	3360	880	2	0	0	0
106604	18085	18057	1	24	neg	neg	36.8	0	0	0	0		1	2	13	1	6	4	3	2	3	1	2	0	0	0	1	11600	860	3	0	0	0
106604	18115	18057	2	24	neg	neg	36.8	0	0	0	0	0	1	2	13	1	6	4	3	2	3	1	2	0	0	0	1	11600	860	3	0	0	0
106604	18145	18057	3	24	neg	neg	36.5	0	0	0	0	0	1	2	13	1	6	4	3	2	3	1	2	0	0	0	1	11600	860	3	0	0	0
106604	18175	18057	4	24	neg	neg	36.5	0	0	0	0	0	1	2	13	1	6	4	3	2	3	1	2	0	0	0	1	11600	860	3	0	0	0
106604	18205	18057	5	24	neg	neg	36.6	0	0	0	0	0	1	2	13	1	6	4	3	2	3	1	2	0	0	0	1	11600	860	3	0	0	0
106604	18235	18057	6	24	neg	v	36.9	0	0	0	0	0	1	2	13	1	6	4	3	2	3	1	2	0	1	0	1	11600	860	3	0	0	0
106604	18265	18057	7	24	neg	neg	36.7	0	0	0	0	0	1	2	13	1	6	4	3	2	3	1	2	0	0	0	1	11600	860	3	0	0	0
106604	18295	18057	8	24	neg	neg	36.8	0	0	0	0	0	1	2	13	1	6	4	3	2	3	1	2	0	0	0	1	11600	860	3	0	0	0
106604	18325	18057	9	24	f	f	39.5	13000	0	0	0	0	1	2	13	1	6	4	3	2	3	1	2	0	0	0	1	11600	860	3	0	0	1
106604	18355	18057	10	24	neg	neg	37	0	0	0	0	0	1	2	13	1	6	4	3	2	3	1	2	0	0	0	1	11600	860	3	0	0	0
106604	18385	18057	11	24	neg	neg	36.8	0	0	0	0	0	1	2	13	1	6	4	3	2	3	1	2	0	0	0	1	11600	860	3	0	0	0
106604	18413	18057	12	24	v	v	36.9	0	0	720	480	0	1	2	13	1	6	4	3	2	3	1	2	1	1	0	1	11600	860	3	0	0	0
106604	18445	18057	13	24	neg	neg	38.2	0	0	0	0	0	1	2	13	1	6	4	3	2	3	1	2	0	0	0	1	11600	860	3	0	0	0
106604	18475	18057	14	24	neg	neg	36.8	0	0	0	0	0	1	2	13	1	6	4	3	2	3	1	2	0	0	0	1	11600	860	3	0	0	0
106604	18505	18057	15	24	neg	neg	37.2	0	0	0	0	0	1	2	13	1	6	4	3	2	3	1	2	0	0	0	1	11600	860	3	0	0	0
106604	18528	18057	16	24	v	v	40.1	0	0	6517	1173	1	1	2	13	1	6	4	3	2	3	1	2	1	1	1	1	11600	860	3	0	0	0
106604	18565	18057	17	24	neg	neg	37	0	0	0	0	0	1	2	13	1	6	4	3	2	3	1	2	0	0	0	1	11600	860	3	0	0	0
106604	18595	18057	18	24	neg	neg	37.1	0	0	0	0	0	1	2	13	1	6	4	3	2	3	1	2	0	0	0	1	11600	860	3	0	0	0
106604	18625	18057	19	24	neg	neg	36.9	0	0	0	0	0	1	2	13	1	6	4	3	2	3	1	2	0	0	0	1	11600	860	3	0	0	0
106604	18655	18057	20	24	neg	neg	36.9	0	0	0	0	0	1	2	13	1	6	4	3	2	3	1	2	0	0	0	1	11600	860	3	0	0	0
106604	18685	18057	21	24	neg	neg	36.6	0	0	0	0	0	1	2	13	1	6	4	3	2	3	1	2	0	0	0	1	11600	860	3	0	0	0
106604	18715	18057	22	24	neg	neg	36.6	0	0	0	0	0	1	2	13	1	6	4	3	2	3	1	2	0	0	0	1	11600	860	3	0	0	0
106604	18745	18057	23	24	neg	neg	36.6	0	0	0	0	0	1	2	13	1	6	4	3	2	3	1	2	0	0	0	1	11600	860	3	0	0	0
106604	18775	18057	24	24	neg	neg	36.7	0	0	0	0	0	1	2	13	1	6	4	3	2	3	1	2	0	0	0	1	11600	860	3	0	0	0
106607	18391	18363	1	21	neg	neg	37.1	0	0	0	0		1	1	3	1	0	0	3	1	1	1	2	0	0	0	2	8080	480	3	0	0	0
106607	18421	18363	2	21	neg	neg	36.7	0	0	0	0	0	1	1	3	1	0	0	3	1	1	1	2	0	0	0	2	8080	480	3	0	0	0
106607	18451	18363	3	21	neg	neg	37.4	0	0	0	0	0	1	1	3	1	0	0	3	1	1	1	2	0	0	0	2	8080	480	3	0	0	0
106607	18481	18363	4	21	neg	neg	37.2	0	0	0	0	0	1	1	3	1	0	0	3	1	1	1	2	0	0	0	2	8080	480	3	0	0	0
106607	18511	18363	5	21	neg	neg	36.5	0	0	0	0	0	1	1	3	1	0	0	3	1	1	1	2	0	0	0	2	8080	480	3	0	0	0
106607	18541	18363	6	21	neg	neg	36.5	0	0	0	0	0	1	1	3	1	0	0	3	1	1	1	2	0	0	0	2	8080	480	3	0	0	0
106607	18571	18363	7	21	neg	neg	36.7	0	0	0	0	0	1	1	3	1	0	0	3	1	1	1	2	0	0	0	2	8080	480	3	0	0	0
106607	18601	18363	8	21	neg	neg	37	0	0	0	0	0	1	1	3	1	0	0	3	1	1	1	2	0	0	0	2	8080	480	3	0	0	0
106607	18631	18363	9	21	neg	neg	36.9	0	0	0	0	0	1	1	3	1	0	0	3	1	1	1	2	0	0	0	2	8080	480	3	0	0	0
106607	18661	18363	10	21	neg	neg	36.6	0	0	0	0	0	1	1	3	1	0	0	3	1	1	1	2	0	0	0	2	8080	480	3	0	0	0
106607	18691	18363	11	21	neg	neg	36.6	0	0	0	0	0	1	1	3	1	0	0	3	1	1	1	2	0	0	0	2	8080	480	3	0	0	0
106607	18721	18363	12	21	neg	neg	36.5	0	0	0	0	0	1	1	3	1	0	0	3	1	1	1	2	0	0	0	2	8080	480	3	0	0	0
106607	18751	18363	13	21	neg	neg	36.9	0	0	0	0	0	1	1	3	1	0	0	3	1	1	1	2	0	0	0	2	8080	480	3	0	0	0
106607	18781	18363	14	21	neg	neg	36.5	0	0	0	0	0	1	1	3	1	0	0	3	1	1	1	2	0	0	0	2	8080	480	3	0	0	0
106607	18811	18363	15	21	neg	neg	36.7	0	0	0	0	0	1	1	3	1	0	0	3	1	1	1	2	0	0	0	2	8080	480	3	0	0	0
106607	18841	18363	16	21	neg	neg	37	0	0	0	0	0	1	1	3	1	0	0	3	1	1	1	2	0	0	0	2	8080	480	3	0	0	0
106607	18871	18363	17	21	neg	neg	36.5	0	0	0	0	0	1	1	3	1	0	0	3	1	1	1	2	0	0	0	2	8080	480	3	0	0	0
106607	18901	18363	18	21	neg	neg	37	0	0	0	0	0	1	1	3	1	0	0	3	1	1	1	2	0	0	0	2	8080	480	3	0	0	0
106607	18931	18363	19	21	neg	neg	36.5	0	0	0	0	0	1	1	3	1	0	0	3	1	1	1	2	0	0	0	2	8080	480	3	0	0	0
106607	18961	18363	20	21	neg	neg	36.8	0	0	0	0	0	1	1	3	1	0	0	3	1	1	1	2	0	0	0	2	8080	480	3	0	0	0
106607	18991	18363	21	21	neg	neg	36.5	0	0	0	0	0	1	1	3	1	0	0	3	1	1	1	2	0	0	0	2	8080	480	3	0	0	0
106803	18518	18490	1	16	neg	neg	37.6	0	0	0	0		1	2	3	1	0	0	1	1	1	1	1	0	0	0	2	2240	600	2	0	0	0
106803	18548	18490	2	16	neg	neg	36.5	0	0	0	0	0	1	2	3	1	0	0	1	1	1	1	1	0	0	0	2	2240	600	2	0	0	0
106803	18578	18490	3	16	neg	neg	37	0	0	0	0	0	1	2	3	1	0	0	1	1	1	1	1	0	0	0	2	2240	600	2	0	0	0
106803	18608	18490	4	16	neg	neg	36.8	0	0	0	0	0	1	2	3	1	0	0	1	1	1	1	1	0	0	0	2	2240	600	2	0	0	0
106803	18638	18490	5	16	neg	neg	36.8	0	0	0	0	0	1	2	3	1	0	0	1	1	1	1	1	0	0	0	2	2240	600	2	0	0	0
106803	18668	18490	6	16	neg	neg	37	0	0	0	0	0	1	2	3	1	0	0	1	1	1	1	1	0	0	0	2	2240	600	2	0	0	0
106803	18698	18490	7	16	neg	neg	36.6	0	0	0	0	0	1	2	3	1	0	0	1	1	1	1	1	0	0	0	2	2240	600	2	0	0	0
106803	18728	18490	8	16	neg	neg	36.6	0	0	0	0	0	1	2	3	1	0	0	1	1	1	1	1	0	0	0	2	2240	600	2	0	0	0
106803	18758	18490	9	16	neg	neg	36.8	0	0	0	0	0	1	2	3	1	0	0	1	1	1	1	1	0	0	0	2	2240	600	2	0	0	0
106803	18788	18490	10	16	neg	neg	36.7	0	0	0	0	0	1	2	3	1	0	0	1	1	1	1	1	0	0	0	2	2240	600	2	0	0	0
106803	18818	18490	11	16	neg	neg	36.8	0	0	0	0	0	1	2	3	1	0	0	1	1	1	1	1	0	0	0	2	2240	600	2	0	0	0
106803	18848	18490	12	16	neg	neg	37.1	0	0	0	0	0	1	2	3	1	0	0	1	1	1	1	1	0	0	0	2	2240	600	2	0	0	0
106803	18878	18490	13	16	neg	neg	36.8	0	0	0	0	0	1	2	3	1	0	0	1	1	1	1	1	0	0	0	2	2240	600	2	0	0	0
106803	18908	18490	14	16	neg	neg	37	0	0	0	0	0	1	2	3	1	0	0	1	1	1	1	1	0	0	0	2	2240	600	2	0	0	0
106803	18938	18490	15	16	neg	neg	36.8	0	0	0	0	0	1	2	3	1	0	0	1	1	1	1	1	0	0	0	2	2240	600	2	0	0	0
106803	18968	18490	16	16	neg	neg	36.8	0	0	0	0	0	1	2	3	1	0	0	1	1	1	1	1	0	0	0	2	2240	600	2	0	0	0
106901	18428	18400	1	19	neg	neg	36.8	0	0	0	0		1	1	30	1	5	1	1	4	2	1	2	0	0	0	2	560	160	1	0	0	0
106901	18458	18400	2	19	neg	neg	36.9	0	0	0	0	0	1	1	30	1	5	1	1	4	2	1	2	0	0	0	2	560	160	1	0	0	0
106901	18488	18400	3	19	fv	fv	36.9	160	0	48	16	0	1	1	30	1	5	1	1	4	2	1	2	1	1	0	2	560	160	1	0	0	0
106901	18518	18400	4	19	neg	neg	37	0	0	0	0	0	1	1	30	1	5	1	1	4	2	1	2	0	0	0	2	560	160	1	0	0	0
106901	18548	18400	5	19	neg	v	36.6	0	0	0	0	0	1	1	30	1	5	1	1	4	2	1	2	0	1	0	2	560	160	1	0	0	0
106901	18578	18400	6	19	neg	v	37	0	0	0	0	0	1	1	30	1	5	1	1	4	2	1	2	0	1	0	2	560	160	1	0	0	0
106901	18608	18400	7	19	neg	neg	36.8	0	0	0	0	0	1	1	30	1	5	1	1	4	2	1	2	0	0	0	2	560	160	1	0	0	0
106901	18638	18400	8	19	neg	neg	36.7	0	0	0	0	0	1	1	30	1	5	1	1	4	2	1	2	0	0	0	2	560	160	1	0	0	0
106901	18668	18400	9	19	neg	neg	36.6	0	0	0	0	0	1	1	30	1	5	1	1	4	2	1	2	0	0	0	2	560	160	1	0	0	0
106901	18698	18400	10	19	neg	neg	36.5	0	0	0	0	0	1	1	30	1	5	1	1	4	2	1	2	0	0	0	2	560	160	1	0	0	0
106901	18728	18400	11	19	neg	neg	36.5	0	0	0	0	0	1	1	30	1	5	1	1	4	2	1	2	0	0	0	2	560	160	1	0	0	0
106901	18758	18400	12	19	neg	neg	36.9	0	0	0	0	1	1	1	30	1	5	1	1	4	2	1	2	0	0	0	2	560	160	1	0	0	0
106901	18788	18400	13	19	neg	neg	37	0	0	0	0	0	1	1	30	1	5	1	1	4	2	1	2	0	0	0	2	560	160	1	0	0	0
106901	18818	18400	14	19	neg	neg	36.9	0	0	0	0	0	1	1	30	1	5	1	1	4	2	1	2	0	0	0	2	560	160	1	0	0	0
106901	18848	18400	15	19	neg	neg	37.1	0	0	0	0	0	1	1	30	1	5	1	1	4	2	1	2	0	0	0	2	560	160	1	0	0	0
106901	18878	18400	16	19	neg	neg	37	0	0	0	0	0	1	1	30	1	5	1	1	4	2	1	2	0	0	0	2	560	160	1	0	0	0
106901	18908	18400	17	19	neg	neg	37.2	0	0	0	0	0	1	1	30	1	5	1	1	4	2	1	2	0	0	0	2	560	160	1	0	0	0
106901	18938	18400	18	19	neg	neg	36.6	0	0	0	0	0	1	1	30	1	5	1	1	4	2	1	2	0	0	0	2	560	160	1	0	0	0
106901	18968	18400	19	19	neg	neg	37	0	0	0	0	0	1	1	30	1	5	1	1	4	2	1	2	0	0	0	2	560	160	1	0	0	0
106902	18407	18379	1	20	neg	neg	36.9	0	0	0	0		1	2	28	1	3	1	1	3	2	1	2	0	0	0	2	2720	440	2	0	0	0
106902	18437	18379	2	20	neg	neg	36.5	0	0	0	0	0	1	2	28	1	3	1	1	3	2	1	2	0	0	0	2	2720	440	2	0	0	0
106902	18467	18379	3	20	neg	neg	37.1	0	0	0	0	0	1	2	28	1	3	1	1	3	2	1	2	0	0	0	2	2720	440	2	0	0	0
106902	18497	18379	4	20	neg	neg	36.6	0	0	0	0	1	1	2	28	1	3	1	1	3	2	1	2	0	0	0	2	2720	440	2	0	0	0
106902	18527	18379	5	20	neg	neg	36.7	0	0	0	0	0	1	2	28	1	3	1	1	3	2	1	2	0	0	0	2	2720	440	2	0	0	0
106902	18557	18379	6	20	neg	neg	37	0	0	0	0	0	1	2	28	1	3	1	1	3	2	1	2	0	0	0	2	2720	440	2	0	0	0
106902	18587	18379	7	20	neg	neg	36.6	0	0	0	0	0	1	2	28	1	3	1	1	3	2	1	2	0	0	0	2	2720	440	2	0	0	0
106902	18617	18379	8	20	neg	neg	36.6	0	0	0	0	0	1	2	28	1	3	1	1	3	2	1	2	0	0	0	2	2720	440	2	0	0	0
106902	18647	18379	9	20	neg	neg	36.8	0	0	0	0	0	1	2	28	1	3	1	1	3	2	1	2	0	0	0	2	2720	440	2	0	0	0
106902	18677	18379	10	20	neg	neg	36.8	0	0	0	0	0	1	2	28	1	3	1	1	3	2	1	2	0	0	0	2	2720	440	2	0	0	0
106902	18707	18379	11	20	neg	neg	36.6	0	0	0	0	0	1	2	28	1	3	1	1	3	2	1	2	0	0	0	2	2720	440	2	0	0	0
106902	18737	18379	12	20	neg	neg	36.7	0	0	0	0	0	1	2	28	1	3	1	1	3	2	1	2	0	0	0	2	2720	440	2	0	0	0
106902	18767	18379	13	20	neg	neg	36.7	0	0	0	0	0	1	2	28	1	3	1	1	3	2	1	2	0	0	0	2	2720	440	2	0	0	0
106902	18797	18379	14	20	neg	neg	37	0	0	0	0	0	1	2	28	1	3	1	1	3	2	1	2	0	0	0	2	2720	440	2	0	0	0
106902	18827	18379	15	20	neg	neg	37	0	0	0	0	0	1	2	28	1	3	1	1	3	2	1	2	0	0	0	2	2720	440	2	0	0	0
106902	18857	18379	16	20	neg	neg	36.7	0	0	0	0	0	1	2	28	1	3	1	1	3	2	1	2	0	0	0	2	2720	440	2	0	0	0
106902	18887	18379	17	20	neg	neg	37	0	0	0	0	0	1	2	28	1	3	1	1	3	2	1	2	0	0	0	2	2720	440	2	0	0	0
106902	18917	18379	18	20	neg	neg	36.8	0	0	0	0	0	1	2	28	1	3	1	1	3	2	1	2	0	0	0	2	2720	440	2	0	0	0
106902	18947	18379	19	20	neg	neg	36.7	0	0	0	0	0	1	2	28	1	3	1	1	3	2	1	2	0	0	0	2	2720	440	2	0	0	0
106902	18977	18379	20	20	neg	neg	36.9	0	0	0	0	0	1	2	28	1	3	1	1	3	2	1	2	0	0	0	2	2720	440	2	0	0	0
106903	18432	18404	1	19	neg	neg	37	0	0	0	0		1	1	8	1	1	4	1	1	2	1	2	0	0	0	2	15040	120	3	0	0	0
106903	18462	18404	2	19	neg	neg	36.5	0	0	0	0	0	1	1	8	1	1	4	1	1	2	1	2	0	0	0	2	15040	120	3	0	0	0
106903	18492	18404	3	19	neg	neg	37.3	0	0	0	0	0	1	1	8	1	1	4	1	1	2	1	2	0	0	0	2	15040	120	3	0	0	0
106903	18522	18404	4	19	neg	neg	37	0	0	0	0	0	1	1	8	1	1	4	1	1	2	1	2	0	0	0	2	15040	120	3	0	0	0
106903	18552	18404	5	19	neg	neg	36.8	0	0	0	0	0	1	1	8	1	1	4	1	1	2	1	2	0	0	0	2	15040	120	3	0	0	0
106903	18582	18404	6	19	neg	neg	36.7	0	0	0	0	0	1	1	8	1	1	4	1	1	2	1	2	0	0	0	2	15040	120	3	0	0	0
106903	18612	18404	7	19	neg	neg	37	0	0	0	0	0	1	1	8	1	1	4	1	1	2	1	2	0	0	0	2	15040	120	3	0	0	0
106903	18642	18404	8	19	neg	neg	37.3	0	0	0	0	0	1	1	8	1	1	4	1	1	2	1	2	0	0	0	2	15040	120	3	0	0	0
106903	18672	18404	9	19	neg	neg	36.7	0	0	0	0	0	1	1	8	1	1	4	1	1	2	1	2	0	0	0	2	15040	120	3	0	0	0
106903	18702	18404	10	19	neg	neg	36.6	0	0	0	0	0	1	1	8	1	1	4	1	1	2	1	2	0	0	0	2	15040	120	3	0	0	0
106903	18732	18404	11	19	neg	neg	36.6	0	0	0	0	0	1	1	8	1	1	4	1	1	2	1	2	0	0	0	2	15040	120	3	0	0	0
106903	18762	18404	12	19	neg	neg	36.7	0	0	0	0	0	1	1	8	1	1	4	1	1	2	1	2	0	0	0	2	15040	120	3	0	0	0
106903	18792	18404	13	19	neg	neg	36.7	0	0	0	0	0	1	1	8	1	1	4	1	1	2	1	2	0	0	0	2	15040	120	3	0	0	0
106903	18822	18404	14	19	neg	neg	36.8	0	0	0	0	0	1	1	8	1	1	4	1	1	2	1	2	0	0	0	2	15040	120	3	0	0	0
106903	18852	18404	15	19	neg	neg	36.9	0	0	0	0	0	1	1	8	1	1	4	1	1	2	1	2	0	0	0	2	15040	120	3	0	0	0
106903	18882	18404	16	19	neg	neg	36.7	0	0	0	0	0	1	1	8	1	1	4	1	1	2	1	2	0	0	0	2	15040	120	3	0	0	0
106903	18912	18404	17	19	neg	neg	36.9	0	0	0	0	0	1	1	8	1	1	4	1	1	2	1	2	0	0	0	2	15040	120	3	0	0	0
106903	18942	18404	18	19	neg	neg	36.5	0	0	0	0	0	1	1	8	1	1	4	1	1	2	1	2	0	0	0	2	15040	120	3	0	0	0
106903	18972	18404	19	19	neg	neg	37	0	0	0	0	0	1	1	8	1	1	4	1	1	2	1	2	0	0	0	2	15040	120	3	0	0	0
106904	18432	18404	1	19	neg	v	36.8	0	0	0	0		1	2	4	1	0	0	1	1	1	1	2	0	1	0	2	13040	160	3	0	1	0
106904	18462	18404	2	19	neg	neg	37	0	0	0	0	0	1	2	4	1	0	0	1	1	1	1	2	0	0	0	2	13040	160	3	0	0	0
106904	18492	18404	3	19	neg	neg	37.1	0	0	0	0	0	1	2	4	1	0	0	1	1	1	1	2	0	0	0	2	13040	160	3	0	0	0
106904	18522	18404	4	19	neg	v	37	0	0	0	0	0	1	2	4	1	0	0	1	1	1	1	2	0	1	0	2	13040	160	3	0	0	0
106904	18552	18404	5	19	neg	neg	36.8	0	0	0	0	0	1	2	4	1	0	0	1	1	1	1	2	0	0	0	2	13040	160	3	0	0	0
106904	18571	18404	6	19	v	v	37.5	0	0	9040	3200	1	1	2	4	1	0	0	1	1	1	1	2	1	1	1	2	13040	160	3	0	0	0
106904	18612	18404	7	19	neg	neg	37	0	0	0	0	0	1	2	4	1	0	0	1	1	1	1	2	0	0	0	2	13040	160	3	0	0	0
106904	18642	18404	8	19	neg	neg	36.8	0	0	0	0	0	1	2	4	1	0	0	1	1	1	1	2	0	0	0	2	13040	160	3	0	0	0
106904	18672	18404	9	19	neg	neg	36.6	0	0	0	0	0	1	2	4	1	0	0	1	1	1	1	2	0	0	0	2	13040	160	3	0	0	0
106904	18702	18404	10	19	neg	neg	36.6	0	0	0	0	0	1	2	4	1	0	0	1	1	1	1	2	0	0	0	2	13040	160	3	0	0	0
106904	18732	18404	11	19	neg	neg	37.1	0	0	0	0	0	1	2	4	1	0	0	1	1	1	1	2	0	0	0	2	13040	160	3	0	0	0
106904	18762	18404	12	19	neg	neg	36.8	0	0	0	0	0	1	2	4	1	0	0	1	1	1	1	2	0	0	0	2	13040	160	3	0	0	0
106904	18792	18404	13	19	neg	neg	36.8	0	0	0	0	0	1	2	4	1	0	0	1	1	1	1	2	0	0	0	2	13040	160	3	0	0	0
106904	18822	18404	14	19	neg	neg	37	0	0	0	0	0	1	2	4	1	0	0	1	1	1	1	2	0	0	0	2	13040	160	3	0	0	0
106904	18852	18404	15	19	neg	neg	36.6	0	0	0	0	0	1	2	4	1	0	0	1	1	1	1	2	0	0	0	2	13040	160	3	0	0	0
106904	18882	18404	16	19	neg	neg	36.8	0	0	0	0	0	1	2	4	1	0	0	1	1	1	1	2	0	0	0	2	13040	160	3	0	0	0
106904	18912	18404	17	19	neg	neg	36.8	0	0	0	0	0	1	2	4	1	0	0	1	1	1	1	2	0	0	0	2	13040	160	3	0	0	0
106904	18942	18404	18	19	neg	v	36.6	0	0	0	0	0	1	2	4	1	0	0	1	1	1	1	2	0	1	0	2	13040	160	3	0	0	0
106904	18972	18404	19	19	neg	neg	36.8	0	0	0	0	0	1	2	4	1	0	0	1	1	1	1	2	0	0	0	2	13040	160	3	0	0	0
107002	18281	18253	1	24	neg	neg	36.6	0	0	0	0		1	2	24	1	6	1	1	3	3	1	1	0	0	0	1	1920	80	2	0	0	0
107002	18311	18253	2	24	neg	v	37.5	0	0	0	0	0	1	2	24	1	6	1	1	3	3	1	1	0	1	0	1	1920	80	2	0	0	0
107002	18341	18253	3	24	neg	neg	36.5	0	0	0	0	0	1	2	24	1	6	1	1	3	3	1	1	0	0	0	1	1920	80	2	0	0	0
107002	18371	18253	4	24	neg	neg	36.6	0	0	0	0	0	1	2	24	1	6	1	1	3	3	1	1	0	0	0	1	1920	80	2	0	0	0
107002	18401	18253	5	24	neg	neg	36.7	0	0	0	0	0	1	2	24	1	6	1	1	3	3	1	1	0	0	0	1	1920	80	2	0	0	0
107002	18431	18253	6	24	neg	neg	36.5	0	0	0	0	0	1	2	24	1	6	1	1	3	3	1	1	0	0	0	1	1920	80	2	0	0	0
107002	18461	18253	7	24	neg	neg	36.9	0	0	0	0	0	1	2	24	1	6	1	1	3	3	1	1	0	0	0	1	1920	80	2	0	0	0
107002	18491	18253	8	24	neg	neg	37.1	0	0	0	0	0	1	2	24	1	6	1	1	3	3	1	1	0	0	0	1	1920	80	2	0	0	0
107002	18520	18253	9	24	neg	neg	36.5	0	0	0	0	0	1	2	24	1	6	1	1	3	3	1	1	0	0	0	1	1920	80	2	0	0	0
107002	18551	18253	10	24	neg	neg	36.8	0	0	0	0	0	1	2	24	1	6	1	1	3	3	1	1	0	0	0	1	1920	80	2	0	0	0
107002	18581	18253	11	24	neg	neg	37	0	0	0	0	0	1	2	24	1	6	1	1	3	3	1	1	0	0	0	1	1920	80	2	0	0	0
107002	18611	18253	12	24	neg	neg	37	0	0	0	0	0	1	2	24	1	6	1	1	3	3	1	1	0	0	0	1	1920	80	2	0	0	0
107002	18623	18253	13	24	fv	fv	38.2	1880	0	5880	640	1	1	2	24	1	6	1	1	3	3	1	1	1	1	1	1	1920	80	2	0	0	0
107002	18671	18253	14	24	v	v	36.6	0	0	400	112	0	1	2	24	1	6	1	1	3	3	1	1	1	1	0	1	1920	80	2	1	1	0
107002	18701	18253	15	24	neg	neg	36.7	0	0	0	0	0	1	2	24	1	6	1	1	3	3	1	1	0	0	0	1	1920	80	2	0	0	0
107002	18731	18253	16	24	v	v	36.7	0	0	1160	160	1	1	2	24	1	6	1	1	3	3	1	1	1	1	0	1	1920	80	2	0	0	0
107002	18761	18253	17	24	neg	neg	36.9	0	0	0	0	0	1	2	24	1	6	1	1	3	3	1	1	0	0	0	1	1920	80	2	0	0	0
107002	18791	18253	18	24	neg	neg	37	0	0	0	0	0	1	2	24	1	6	1	1	3	3	1	1	0	0	0	1	1920	80	2	0	0	0
107002	18821	18253	19	24	v	v	37	0	0	200	0	0	1	2	24	1	6	1	1	3	3	1	1	1	1	0	1	1920	80	2	0	0	0
107002	18851	18253	20	24	neg	neg	37	0	0	0	0	0	1	2	24	1	6	1	1	3	3	1	1	0	0	0	1	1920	80	2	0	0	0
107002	18881	18253	21	24	neg	neg	36.5	0	0	0	0	0	1	2	24	1	6	1	1	3	3	1	1	0	0	0	1	1920	80	2	0	0	0
107002	18911	18253	22	24	neg	neg	37.2	0	0	0	0	0	1	2	24	1	6	1	1	3	3	1	1	0	0	0	1	1920	80	2	0	0	0
107002	18941	18253	23	24	neg	neg	36.8	0	0	0	0	0	1	2	24	1	6	1	1	3	3	1	1	0	0	0	1	1920	80	2	0	0	0
107002	18971	18253	24	24	neg	neg	36.8	0	0	0	0	0	1	2	24	1	6	1	1	3	3	1	1	0	0	0	1	1920	80	2	0	0	0
107003	18462	18434	1	18	neg	neg	36.9	0	0	0	0		1	2	3	1	0	0	1	1	1	1	2	0	0	0	2	720	120	1	0	0	0
107003	18492	18434	2	18	neg	neg	37	0	0	0	0	0	1	2	3	1	0	0	1	1	1	1	2	0	0	0	2	720	120	1	0	0	0
107003	18501	18434	3	18	v	v	39	0	0	3080	0	1	1	2	3	1	0	0	1	1	1	1	2	1	1	1	2	720	120	1	0	0	0
107003	18552	18434	4	18	neg	neg	36.9	0	0	0	0	0	1	2	3	1	0	0	1	1	1	1	2	0	0	0	2	720	120	1	0	0	0
107003	18582	18434	5	18	neg	neg	36.8	0	0	0	0	0	1	2	3	1	0	0	1	1	1	1	2	0	0	0	2	720	120	1	0	0	0
107003	18612	18434	6	18	neg	v	37	0	0	0	0	0	1	2	3	1	0	0	1	1	1	1	2	0	1	0	2	720	120	1	0	0	0
107003	18622	18434	7	18	v	v	39.1	0	0	15880	2680	1	1	2	3	1	0	0	1	1	1	1	2	1	1	1	2	720	120	1	0	0	0
107003	18672	18434	8	18	neg	v	37	0	0	0	0	0	1	2	3	1	0	0	1	1	1	1	2	0	1	0	2	720	120	1	0	1	0
107003	18702	18434	9	18	neg	neg	36.6	0	0	0	0	0	1	2	3	1	0	0	1	1	1	1	2	0	0	0	2	720	120	1	0	0	0
107003	18732	18434	10	18	neg	neg	36.8	0	0	0	0	0	1	2	3	1	0	0	1	1	1	1	2	0	0	0	2	720	120	1	0	0	0
107003	18762	18434	11	18	neg	neg	36.7	0	0	0	0	0	1	2	3	1	0	0	1	1	1	1	2	0	0	0	2	720	120	1	0	0	0
107003	18792	18434	12	18	neg	neg	36.9	0	0	0	0	0	1	2	3	1	0	0	1	1	1	1	2	0	0	0	2	720	120	1	0	0	0
107003	18822	18434	13	18	neg	neg	36.7	0	0	0	0	0	1	2	3	1	0	0	1	1	1	1	2	0	0	0	2	720	120	1	0	0	0
107003	18852	18434	14	18	neg	neg	36.5	0	0	0	0	0	1	2	3	1	0	0	1	1	1	1	2	0	0	0	2	720	120	1	0	0	0
107003	18882	18434	15	18	neg	neg	36.7	0	0	0	0	0	1	2	3	1	0	0	1	1	1	1	2	0	0	0	2	720	120	1	0	0	0
107003	18912	18434	16	18	neg	neg	37	0	0	0	0	0	1	2	3	1	0	0	1	1	1	1	2	0	0	0	2	720	120	1	0	0	0
107003	18942	18434	17	18	neg	neg	37	0	0	0	0	0	1	2	3	1	0	0	1	1	1	1	2	0	0	0	2	720	120	1	0	0	0
107003	18972	18434	18	18	neg	v	36.8	0	0	0	0	0	1	2	3	1	0	0	1	1	1	1	2	0	1	0	2	720	120	1	0	0	0
107107	18131	18103	1	24	neg	neg	36.7	0	0	0	0		1	1	21	1	9	1	3	3	3	1	2	0	0	0	1	520	120	1	0	0	0
107107	18161	18103	2	24	neg	neg	36.5	0	0	0	0	0	1	1	21	1	9	1	3	3	3	1	2	0	0	0	1	520	120	1	0	0	0
107107	18191	18103	3	24	neg	neg	36.5	0	0	0	0	0	1	1	21	1	9	1	3	3	3	1	2	0	0	0	1	520	120	1	0	0	0
107107	18221	18103	4	24	neg	neg	36.5	0	0	0	0	0	1	1	21	1	9	1	3	3	3	1	2	0	0	0	1	520	120	1	0	0	0
107107	18251	18103	5	24	neg	neg	36.5	0	0	0	0	0	1	1	21	1	9	1	3	3	3	1	2	0	0	0	1	520	120	1	0	0	0
107107	18281	18103	6	24	neg	neg	36.6	0	0	0	0	0	1	1	21	1	9	1	3	3	3	1	2	0	0	0	1	520	120	1	0	0	0
107107	18311	18103	7	24	neg	neg	37	0	0	0	0	0	1	1	21	1	9	1	3	3	3	1	2	0	0	0	1	520	120	1	0	0	0
107107	18341	18103	8	24	neg	neg	36.6	0	0	0	0	0	1	1	21	1	9	1	3	3	3	1	2	0	0	0	1	520	120	1	0	0	0
107107	18371	18103	9	24	neg	neg	36.5	0	0	0	0	0	1	1	21	1	9	1	3	3	3	1	2	0	0	0	1	520	120	1	0	0	0
107107	18401	18103	10	24	neg	neg	36.5	0	0	0	0	0	1	1	21	1	9	1	3	3	3	1	2	0	0	0	1	520	120	1	0	0	0
107107	18406	18103	11	24	v	v	40.5	0	0	5600	440	1	1	1	21	1	9	1	3	3	3	1	2	1	1	1	1	520	120	1	0	0	0
107107	18461	18103	12	24	neg	v	37.5	0	0	0	0	0	1	1	21	1	9	1	3	3	3	1	2	0	1	0	1	520	120	1	0	1	0
107107	18491	18103	13	24	neg	neg	36.6	0	0	0	0	0	1	1	21	1	9	1	3	3	3	1	2	0	0	0	1	520	120	1	0	0	0
107107	18521	18103	14	24	neg	v	36.5	0	0	0	0	0	1	1	21	1	9	1	3	3	3	1	2	0	1	0	1	520	120	1	0	0	0
107107	18551	18103	15	24	neg	v	37	0	0	0	0	0	1	1	21	1	9	1	3	3	3	1	2	0	1	0	1	520	120	1	0	0	0
107107	18581	18103	16	24	neg	neg	37	0	0	0	0	0	1	1	21	1	9	1	3	3	3	1	2	0	0	0	1	520	120	1	0	0	0
107107	18611	18103	17	24	neg	v	37	0	0	0	0	0	1	1	21	1	9	1	3	3	3	1	2	0	1	0	1	520	120	1	0	0	0
107107	18641	18103	18	24	neg	v	36.7	0	0	0	0	0	1	1	21	1	9	1	3	3	3	1	2	0	1	0	1	520	120	1	0	0	0
107107	18671	18103	19	24	neg	v	36.5	0	0	0	0	0	1	1	21	1	9	1	3	3	3	1	2	0	1	0	1	520	120	1	0	0	0
107107	18701	18103	20	24	neg	v	36.6	0	0	0	0	0	1	1	21	1	9	1	3	3	3	1	2	0	1	0	1	520	120	1	0	0	0
107107	18731	18103	21	24	neg	neg	36.6	0	0	0	0	0	1	1	21	1	9	1	3	3	3	1	2	0	0	0	1	520	120	1	0	0	0
107107	18761	18103	22	24	neg	v	36.8	0	0	0	0	0	1	1	21	1	9	1	3	3	3	1	2	0	1	0	1	520	120	1	0	0	0
107107	18791	18103	23	24	neg	v	36.7	0	0	0	0	0	1	1	21	1	9	1	3	3	3	1	2	0	1	0	1	520	120	1	0	0	0
107107	18821	18103	24	24	neg	neg	36.8	0	0	0	0	0	1	1	21	1	9	1	3	3	3	1	2	0	0	0	1	520	120	1	0	0	0
107302	18479	18451	1	18	neg	neg	37.4	0	0	0	0		1	2	44	1	3	1	1	4	2	1	2	0	0	0	2	840	120	1	0	0	0
107302	18509	18451	2	18	neg	neg	37	0	0	0	0	0	1	2	44	1	3	1	1	4	2	1	2	0	0	0	2	840	120	1	0	0	0
107302	18569	18451	4	18	neg	neg	37	0	0	0	0	0	1	2	44	1	3	1	1	4	2	1	2	0	0	0	2	840	120	1	0	0	0
107302	18599	18451	5	18	neg	neg	38.1	0	0	0	0	0	1	2	44	1	3	1	1	4	2	1	2	0	0	0	2	840	120	1	0	0	0
107302	18629	18451	6	18	neg	v	36.9	0	0	0	0	0	1	2	44	1	3	1	1	4	2	1	2	0	1	0	2	840	120	1	0	0	0
107302	18659	18451	7	18	neg	neg	37	0	0	0	0	0	1	2	44	1	3	1	1	4	2	1	2	0	0	0	2	840	120	1	0	0	0
107302	18689	18451	8	18	neg	neg	36.7	0	0	0	0	0	1	2	44	1	3	1	1	4	2	1	2	0	0	0	2	840	120	1	0	0	0
107302	18719	18451	9	18	neg	neg	36.6	0	0	0	0	0	1	2	44	1	3	1	1	4	2	1	2	0	0	0	2	840	120	1	0	0	0
107302	18749	18451	10	18	neg	neg	37	0	0	0	0	0	1	2	44	1	3	1	1	4	2	1	2	0	0	0	2	840	120	1	0	0	0
107302	18779	18451	11	18	neg	neg	36.8	0	0	0	0	0	1	2	44	1	3	1	1	4	2	1	2	0	0	0	2	840	120	1	0	0	0
107302	18809	18451	12	18	neg	neg	37	0	0	0	0	0	1	2	44	1	3	1	1	4	2	1	2	0	0	0	2	840	120	1	0	0	0
107302	18839	18451	13	18	neg	neg	37	0	0	0	0	0	1	2	44	1	3	1	1	4	2	1	2	0	0	0	2	840	120	1	0	0	0
107302	18869	18451	14	18	neg	neg	37	0	0	0	0	0	1	2	44	1	3	1	1	4	2	1	2	0	0	0	2	840	120	1	0	0	0
107302	18899	18451	15	18	neg	v	36.7	0	0	0	0	0	1	2	44	1	3	1	1	4	2	1	2	0	1	0	2	840	120	1	0	0	0
107302	18929	18451	16	18	neg	neg	36.8	0	0	0	0	0	1	2	44	1	3	1	1	4	2	1	2	0	0	0	2	840	120	1	0	0	0
107302	18959	18451	17	18	neg	neg	36.8	0	0	0	0	0	1	2	44	1	3	1	1	4	2	1	2	0	0	0	2	840	120	1	0	0	0
107302	18989	18451	18	18	neg	v	37	0	0	0	0	0	1	2	44	1	3	1	1	4	2	1	2	0	1	0	2	840	120	1	0	0	0
107303	18061	18033	1	24	neg	neg	36.8	0	0	0	0		1	1	19	1	8	1	1	2	3	1	2	0	0	0	1	600	26	1	0	0	0
107303	18091	18033	2	24	neg	neg	36.8	0	0	0	0	0	1	1	19	1	8	1	1	2	3	1	2	0	0	0	1	600	26	1	0	0	0
107303	18121	18033	3	24	neg	neg	36.7	0	0	0	0	0	1	1	19	1	8	1	1	2	3	1	2	0	0	0	1	600	26	1	0	0	0
107303	18151	18033	4	24	f	f	36.5	2400	0	0	0	0	1	1	19	1	8	1	1	2	3	1	2	0	0	0	1	600	26	1	0	0	1
107303	18181	18033	5	24	neg	neg	36.8	0	0	0	0	0	1	1	19	1	8	1	1	2	3	1	2	0	0	0	1	600	26	1	0	0	0
107303	18211	18033	6	24	neg	neg	36.5	0	0	0	0	0	1	1	19	1	8	1	1	2	3	1	2	0	0	0	1	600	26	1	0	0	0
107303	18241	18033	7	24	neg	neg	37.6	0	0	0	0	0	1	1	19	1	8	1	1	2	3	1	2	0	0	0	1	600	26	1	0	0	0
107303	18271	18033	8	24	neg	neg	36.6	0	0	0	0	0	1	1	19	1	8	1	1	2	3	1	2	0	0	0	1	600	26	1	0	0	0
107303	18301	18033	9	24	neg	neg	37.1	0	0	0	0	1	1	1	19	1	8	1	1	2	3	1	2	0	0	0	1	600	26	1	0	0	0
107303	18331	18033	10	24	neg	neg	37	0	0	0	0	0	1	1	19	1	8	1	1	2	3	1	2	0	0	0	1	600	26	1	0	0	0
107303	18361	18033	11	24	neg	neg	36.5	0	0	0	0	0	1	1	19	1	8	1	1	2	3	1	2	0	0	0	1	600	26	1	0	0	0
107303	18391	18033	12	24	neg	neg	36.8	0	0	0	0	0	1	1	19	1	8	1	1	2	3	1	2	0	0	0	1	600	26	1	0	0	0
107303	18421	18033	13	24	neg	neg	37	0	0	0	0	0	1	1	19	1	8	1	1	2	3	1	2	0	0	0	1	600	26	1	0	0	0
107303	18451	18033	14	24	neg	neg	37	0	0	0	0	0	1	1	19	1	8	1	1	2	3	1	2	0	0	0	1	600	26	1	0	0	0
107303	18470	18033	15	24	v	v	37	0	0	3840	120	1	1	1	19	1	8	1	1	2	3	1	2	1	1	0	1	600	26	1	0	0	0
107303	18511	18033	16	24	neg	neg	36.7	0	0	0	0	0	1	1	19	1	8	1	1	2	3	1	2	0	0	0	1	600	26	1	0	0	0
107303	18541	18033	17	24	neg	neg	37	0	0	0	0	0	1	1	19	1	8	1	1	2	3	1	2	0	0	0	1	600	26	1	0	0	0
107303	18571	18033	18	24	neg	neg	37	0	0	0	0	0	1	1	19	1	8	1	1	2	3	1	2	0	0	0	1	600	26	1	0	0	0
107303	18601	18033	19	24	neg	neg	36.8	0	0	0	0	0	1	1	19	1	8	1	1	2	3	1	2	0	0	0	1	600	26	1	0	0	0
107303	18631	18033	20	24	neg	neg	36.6	0	0	0	0	0	1	1	19	1	8	1	1	2	3	1	2	0	0	0	1	600	26	1	0	0	0
107303	18661	18033	21	24	neg	neg	36.6	0	0	0	0	0	1	1	19	1	8	1	1	2	3	1	2	0	0	0	1	600	26	1	0	0	0
107303	18691	18033	22	24	neg	neg	36.6	0	0	0	0	0	1	1	19	1	8	1	1	2	3	1	2	0	0	0	1	600	26	1	0	0	0
107303	18721	18033	23	24	neg	neg	36.6	0	0	0	0	0	1	1	19	1	8	1	1	2	3	1	2	0	0	0	1	600	26	1	0	0	0
107303	18751	18033	24	24	neg	neg	36.9	0	0	0	0	0	1	1	19	1	8	1	1	2	3	1	2	0	0	0	1	600	26	1	0	0	0
107306	18061	18033	1	24	neg	neg	37	0	0	0	0		1	1	10	1	3	4	1	2	2	1	2	0	0	0	1	128	24	1	0	0	0
107306	18091	18033	2	24	neg	neg	36.6	0	0	0	0	0	1	1	10	1	3	4	1	2	2	1	2	0	0	0	1	128	24	1	0	0	0
107306	18121	18033	3	24	neg	neg	36.8	0	0	0	0	0	1	1	10	1	3	4	1	2	2	1	2	0	0	0	1	128	24	1	0	0	0
107306	18151	18033	4	24	neg	neg	37.1	0	0	0	0	0	1	1	10	1	3	4	1	2	2	1	2	0	0	0	1	128	24	1	0	0	0
107306	18181	18033	5	24	neg	neg	36.8	0	0	0	0	0	1	1	10	1	3	4	1	2	2	1	2	0	0	0	1	128	24	1	0	0	0
107306	18211	18033	6	24	neg	neg	36.5	0	0	0	0	0	1	1	10	1	3	4	1	2	2	1	2	0	0	0	1	128	24	1	0	0	0
107306	18241	18033	7	24	neg	neg	36.8	0	0	0	0	0	1	1	10	1	3	4	1	2	2	1	2	0	0	0	1	128	24	1	0	0	0
107306	18271	18033	8	24	neg	neg	36.6	0	0	0	0	0	1	1	10	1	3	4	1	2	2	1	2	0	0	0	1	128	24	1	0	0	0
107306	18301	18033	9	24	neg	neg	36.6	0	0	0	0	0	1	1	10	1	3	4	1	2	2	1	2	0	0	0	1	128	24	1	0	0	0
107306	18315	18033	10	24	f	f	37.8	32400	3200	0	0	1	1	1	10	1	3	4	1	2	2	1	2	0	0	0	1	128	24	1	0	0	1
107306	18361	18033	11	24	neg	neg	36.6	0	0	0	0	0	1	1	10	1	3	4	1	2	2	1	2	0	0	0	1	128	24	1	0	0	0
107306	18391	18033	12	24	neg	neg	36.9	0	0	0	0	0	1	1	10	1	3	4	1	2	2	1	2	0	0	0	1	128	24	1	0	0	0
107306	18421	18033	13	24	neg	neg	37	0	0	0	0	0	1	1	10	1	3	4	1	2	2	1	2	0	0	0	1	128	24	1	0	0	0
107306	18451	18033	14	24	neg	neg	36.8	0	0	0	0	0	1	1	10	1	3	4	1	2	2	1	2	0	0	0	1	128	24	1	0	0	0
107306	18481	18033	15	24	neg	neg	39	0	0	0	0	1	1	1	10	1	3	4	1	2	2	1	2	0	0	0	1	128	24	1	0	0	0
107306	18511	18033	16	24	neg	neg	36.5	0	0	0	0	0	1	1	10	1	3	4	1	2	2	1	2	0	0	0	1	128	24	1	0	0	0
107306	18541	18033	17	24	neg	neg	36.8	0	0	0	0	0	1	1	10	1	3	4	1	2	2	1	2	0	0	0	1	128	24	1	0	0	0
107306	18571	18033	18	24	neg	neg	37	0	0	0	0	0	1	1	10	1	3	4	1	2	2	1	2	0	0	0	1	128	24	1	0	0	0
107306	18601	18033	19	24	neg	neg	36.7	0	0	0	0	0	1	1	10	1	3	4	1	2	2	1	2	0	0	0	1	128	24	1	0	0	0
107306	18631	18033	20	24	neg	neg	36.9	0	0	0	0	0	1	1	10	1	3	4	1	2	2	1	2	0	0	0	1	128	24	1	0	0	0
107306	18661	18033	21	24	neg	neg	36.7	0	0	0	0	0	1	1	10	1	3	4	1	2	2	1	2	0	0	0	1	128	24	1	0	0	0
107306	18691	18033	22	24	neg	neg	36.6	0	0	0	0	0	1	1	10	1	3	4	1	2	2	1	2	0	0	0	1	128	24	1	0	0	0
107306	18721	18033	23	24	neg	neg	36.6	0	0	0	0	0	1	1	10	1	3	4	1	2	2	1	2	0	0	0	1	128	24	1	0	0	0
107306	18751	18033	24	24	neg	neg	36.7	0	0	0	0	0	1	1	10	1	3	4	1	2	2	1	2	0	0	0	1	128	24	1	0	0	0
107403	18352	18324	1	22	neg	neg	37.1	0	0	0	0		1	1	7	1	1	4	1	1	2	1	2	0	0	0	2	9640	600	3	0	0	0
107403	18382	18324	2	22	neg	neg	36.7	0	0	0	0	0	1	1	7	1	1	4	1	1	2	1	2	0	0	0	2	9640	600	3	0	0	0
107403	18412	18324	3	22	neg	neg	36.8	0	0	0	0	0	1	1	7	1	1	4	1	1	2	1	2	0	0	0	2	9640	600	3	0	0	0
107403	18442	18324	4	22	neg	neg	37	0	0	0	0	0	1	1	7	1	1	4	1	1	2	1	2	0	0	0	2	9640	600	3	0	0	0
107403	18502	18324	6	22	neg	neg	37.1	0	0	0	0	0	1	1	7	1	1	4	1	1	2	1	2	0	0	0	2	9640	600	3	0	0	0
107403	18532	18324	7	22	neg	neg	36.6	0	0	0	0	0	1	1	7	1	1	4	1	1	2	1	2	0	0	0	2	9640	600	3	0	0	0
107403	18592	18324	9	22	neg	neg	37	0	0	0	0	0	1	1	7	1	1	4	1	1	2	1	2	0	0	0	2	9640	600	3	0	0	0
107403	18622	18324	10	22	neg	neg	36.6	0	0	0	0	0	1	1	7	1	1	4	1	1	2	1	2	0	0	0	2	9640	600	3	0	0	0
107403	18652	18324	11	22	neg	neg	36.8	0	0	0	0	0	1	1	7	1	1	4	1	1	2	1	2	0	0	0	2	9640	600	3	0	0	0
107403	18682	18324	12	22	neg	neg	36.9	0	0	0	0	0	1	1	7	1	1	4	1	1	2	1	2	0	0	0	2	9640	600	3	0	0	0
107403	18712	18324	13	22	neg	neg	36.5	0	0	0	0	0	1	1	7	1	1	4	1	1	2	1	2	0	0	0	2	9640	600	3	0	0	0
107403	18742	18324	14	22	neg	neg	36.7	0	0	0	0	0	1	1	7	1	1	4	1	1	2	1	2	0	0	0	2	9640	600	3	0	0	0
107403	18772	18324	15	22	neg	neg	36.8	0	0	0	0	0	1	1	7	1	1	4	1	1	2	1	2	0	0	0	2	9640	600	3	0	0	0
107403	18802	18324	16	22	neg	neg	37	0	0	0	0	0	1	1	7	1	1	4	1	1	2	1	2	0	0	0	2	9640	600	3	0	0	0
107403	18832	18324	17	22	neg	neg	37	0	0	0	0	0	1	1	7	1	1	4	1	1	2	1	2	0	0	0	2	9640	600	3	0	0	0
107403	18862	18324	18	22	neg	v	36.5	0	0	0	0	0	1	1	7	1	1	4	1	1	2	1	2	0	1	0	2	9640	600	3	0	0	0
107403	18892	18324	19	22	neg	neg	36.5	0	0	0	0	0	1	1	7	1	1	4	1	1	2	1	2	0	0	0	2	9640	600	3	0	0	0
107403	18922	18324	20	22	neg	neg	37	0	0	0	0	0	1	1	7	1	1	4	1	1	2	1	2	0	0	0	2	9640	600	3	0	0	0
107403	18952	18324	22	22	neg	neg	37	0	0	0	0	0	1	1	7	1	1	4	1	1	2	1	2	0	0	0	2	9640	600	3	0	0	0
107504	18604	18576	1	5	neg	neg	36.7	0	0	0	0		1	1	15	1	6	4	3	2	3	1	1	0	0	0	2	3440	1400	2	0	0	0
107504	18634	18576	2	5	neg	neg	36.6	0	0	0	0	0	1	1	15	1	6	4	3	2	3	1	1	0	0	0	2	3440	1400	2	0	0	0
107504	18664	18576	3	5	neg	neg	37.1	0	0	0	0	0	1	1	15	1	6	4	3	2	3	1	1	0	0	0	2	3440	1400	2	0	0	0
107504	18694	18576	4	5	neg	neg	36.7	0	0	0	0	0	1	1	15	1	6	4	3	2	3	1	1	0	0	0	2	3440	1400	2	0	0	0
107504	18724	18576	5	5	neg	neg	36.6	0	0	0	0	0	1	1	15	1	6	4	3	2	3	1	1	0	0	0	2	3440	1400	2	0	0	0
107509	18161	18133	1	24	neg	neg	36.5	0	0	0	0		1	1	3	1	0	0	3	1	1	1	1	0	0	0	1	2840	0	2	0	0	0
107509	18191	18133	2	24	neg	neg	37.5	0	0	0	0	0	1	1	3	1	0	0	3	1	1	1	1	0	0	0	1	2840	0	2	0	0	0
107509	18221	18133	3	24	neg	v	40.1	0	0	0	0	1	1	1	3	1	0	0	3	1	1	1	1	0	1	0	1	2840	0	2	0	0	0
107509	18251	18133	4	24	neg	neg	36.5	0	0	0	0	0	1	1	3	1	0	0	3	1	1	1	1	0	0	0	1	2840	0	2	0	0	0
107509	18281	18133	5	24	neg	neg	37.5	0	0	0	0	0	1	1	3	1	0	0	3	1	1	1	1	0	0	0	1	2840	0	2	0	0	0
107509	18311	18133	6	24	f	f	38	3440	440	0	0	1	1	1	3	1	0	0	3	1	1	1	1	0	0	0	1	2840	0	2	0	0	1
107509	18341	18133	7	24	neg	neg	36.6	0	0	0	0	0	1	1	3	1	0	0	3	1	1	1	1	0	0	0	1	2840	0	2	0	0	0
107509	18371	18133	8	24	neg	neg	37.5	0	0	0	0	0	1	1	3	1	0	0	3	1	1	1	1	0	0	0	1	2840	0	2	0	0	0
107509	18385	18133	9	24	neg	v	40.4	27397	0	0	0	1	1	1	3	1	0	0	3	1	1	1	1	0	1	0	1	2840	0	2	0	0	0
107509	18422	18133	10	24	f	f	39.5	2760	0	0	0	1	1	1	3	1	0	0	3	1	1	1	1	0	0	0	1	2840	0	2	0	0	1
107509	18461	18133	11	24	neg	neg	37.2	0	0	0	0	0	1	1	3	1	0	0	3	1	1	1	1	0	0	0	1	2840	0	2	0	0	0
107509	18479	18133	12	24	f	f	38.9	29850	0	0	0	1	1	1	3	1	0	0	3	1	1	1	1	0	0	0	1	2840	0	2	0	0	1
107509	18521	18133	13	24	neg	neg	37.5	0	0	0	0	0	1	1	3	1	0	0	3	1	1	1	1	0	0	0	1	2840	0	2	0	0	0
107509	18551	18133	14	24	neg	neg	36.5	0	0	0	0	0	1	1	3	1	0	0	3	1	1	1	1	0	0	0	1	2840	0	2	0	0	0
107509	18581	18133	15	24	neg	neg	37	0	0	0	0	0	1	1	3	1	0	0	3	1	1	1	1	0	0	0	1	2840	0	2	0	0	0
107509	18601	18133	16	24	v	v	37.9	0	0	23952	4646	0	1	1	3	1	0	0	3	1	1	1	1	1	1	1	1	2840	0	2	0	0	0
107509	18641	18133	17	24	neg	neg	36.7	0	0	0	0	0	1	1	3	1	0	0	3	1	1	1	1	0	0	0	1	2840	0	2	0	0	0
107509	18671	18133	18	24	neg	neg	36.6	0	0	0	0	0	1	1	3	1	0	0	3	1	1	1	1	0	0	0	1	2840	0	2	0	0	0
107509	18717	18133	19	24	v	v	36.8	0	0	64	88	1	1	1	3	1	0	0	3	1	1	1	1	1	1	0	1	2840	0	2	0	0	0
107509	18731	18133	20	24	neg	neg	36.7	0	0	0	0	0	1	1	3	1	0	0	3	1	1	1	1	0	0	0	1	2840	0	2	0	0	0
107509	18761	18133	21	24	v	v	36.9	0	0	3360	920	0	1	1	3	1	0	0	3	1	1	1	1	1	1	0	1	2840	0	2	0	0	0
107509	18791	18133	22	24	neg	neg	37.4	0	0	0	0	0	1	1	3	1	0	0	3	1	1	1	1	0	0	0	1	2840	0	2	0	0	0
107509	18821	18133	23	24	neg	neg	36.8	0	0	0	0	0	1	1	3	1	0	0	3	1	1	1	1	0	0	0	1	2840	0	2	0	0	0
107509	18851	18133	24	24	v	v	37.1	0	0	4840	80	0	1	1	3	1	0	0	3	1	1	1	1	1	1	0	1	2840	0	2	0	0	0
107606	18404	18376	1	13	neg	neg	36.8	0	0	0	0		1	1	15	1	6	4	1	2	3	1	2	0	0	0	2	2320	0	2	0	0	0
107606	18421	18376	2	13	f	f	38.1	56338	0	0	0	1	1	1	15	1	6	4	1	2	3	1	2	0	0	0	2	2320	0	2	0	0	1
107606	18464	18376	3	13	neg	neg	37	0	0	0	0	0	1	1	15	1	6	4	1	2	3	1	2	0	0	0	2	2320	0	2	0	0	0
107606	18494	18376	4	13	neg	neg	37	0	0	0	0	0	1	1	15	1	6	4	1	2	3	1	2	0	0	0	2	2320	0	2	0	0	0
107606	18524	18376	5	13	neg	neg	37	0	0	0	0	0	1	1	15	1	6	4	1	2	3	1	2	0	0	0	2	2320	0	2	0	0	0
107606	18554	18376	6	13	neg	neg	37	0	0	0	0	0	1	1	15	1	6	4	1	2	3	1	2	0	0	0	2	2320	0	2	0	0	0
107606	18584	18376	7	13	neg	v	36.8	0	0	0	0	0	1	1	15	1	6	4	1	2	3	1	2	0	1	0	2	2320	0	2	0	0	0
107606	18614	18376	8	13	neg	neg	36.7	0	0	0	0	0	1	1	15	1	6	4	1	2	3	1	2	0	0	0	2	2320	0	2	0	0	0
107606	18644	18376	9	13	neg	neg	37	0	0	0	0	0	1	1	15	1	6	4	1	2	3	1	2	0	0	0	2	2320	0	2	0	0	0
107606	18674	18376	10	13	neg	neg	36.7	0	0	0	0	0	1	1	15	1	6	4	1	2	3	1	2	0	0	0	2	2320	0	2	0	0	0
107606	18704	18376	11	13	neg	neg	36.6	0	0	0	0	0	1	1	15	1	6	4	1	2	3	1	2	0	0	0	2	2320	0	2	0	0	0
107606	18734	18376	12	13	neg	neg	36.7	0	0	0	0	0	1	1	15	1	6	4	1	2	3	1	2	0	0	0	2	2320	0	2	0	0	0
107606	18764	18376	13	13	neg	neg	36.6	0	0	0	0	0	1	1	15	1	6	4	1	2	3	1	2	0	0	0	2	2320	0	2	0	0	0
107609	18519	18491	1	16	neg	neg	36.6	0	0	0	0		1	2	19	1	3	1	1	2	2	1	1	0	0	0	2	4920	160	2	0	0	0
107609	18549	18491	2	16	neg	f	37.3	0	0	0	0	1	1	2	19	1	3	1	1	2	2	1	1	0	0	0	2	4920	160	2	0	0	0
107609	18579	18491	3	16	neg	neg	36.8	0	0	0	0	1	1	2	19	1	3	1	1	2	2	1	1	0	0	0	2	4920	160	2	0	0	0
107609	18609	18491	4	16	neg	v	36.8	0	0	0	0	0	1	2	19	1	3	1	1	2	2	1	1	0	1	0	2	4920	160	2	0	0	0
107609	18639	18491	5	16	neg	neg	36.9	0	0	0	0	0	1	2	19	1	3	1	1	2	2	1	1	0	0	0	2	4920	160	2	0	0	0
107609	18669	18491	6	16	neg	neg	36.6	0	0	0	0	0	1	2	19	1	3	1	1	2	2	1	1	0	0	0	2	4920	160	2	0	0	0
107609	18699	18491	7	16	neg	neg	36.6	0	0	0	0	0	1	2	19	1	3	1	1	2	2	1	1	0	0	0	2	4920	160	2	0	0	0
107609	18729	18491	8	16	neg	neg	36.6	0	0	0	0	0	1	2	19	1	3	1	1	2	2	1	1	0	0	0	2	4920	160	2	0	0	0
107609	18759	18491	9	16	neg	neg	36.7	0	0	0	0	0	1	2	19	1	3	1	1	2	2	1	1	0	0	0	2	4920	160	2	0	0	0
107609	18789	18491	10	16	neg	neg	36.7	0	0	0	0	0	1	2	19	1	3	1	1	2	2	1	1	0	0	0	2	4920	160	2	0	0	0
107609	18819	18491	11	16	neg	neg	36.8	0	0	0	0	0	1	2	19	1	3	1	1	2	2	1	1	0	0	0	2	4920	160	2	0	0	0
107609	18849	18491	12	16	neg	neg	36.5	0	0	0	0	0	1	2	19	1	3	1	1	2	2	1	1	0	0	0	2	4920	160	2	0	0	0
107609	18879	18491	13	16	neg	neg	37	0	0	0	0	0	1	2	19	1	3	1	1	2	2	1	1	0	0	0	2	4920	160	2	0	0	0
107609	18909	18491	14	16	neg	neg	36.7	0	0	0	0	0	1	2	19	1	3	1	1	2	2	1	1	0	0	0	2	4920	160	2	0	0	0
107609	18939	18491	15	16	neg	neg	37	0	0	0	0	0	1	2	19	1	3	1	1	2	2	1	1	0	0	0	2	4920	160	2	0	0	0
107609	18969	18491	16	16	neg	neg	37	0	0	0	0	0	1	2	19	1	3	1	1	2	2	1	1	0	0	0	2	4920	160	2	0	0	0
108105	18501	18473	1	17	neg	neg	37	0	0	0	0		1	2	3	1	0	0	1	1	1	1	2	0	0	0	2	2240	80	2	0	0	0
108105	18531	18473	2	17	neg	neg	37.1	0	0	0	0	0	1	2	3	1	0	0	1	1	1	1	2	0	0	0	2	2240	80	2	0	0	0
108105	18561	18473	3	17	neg	v	37.4	0	0	0	0	1	1	2	3	1	0	0	1	1	1	1	2	0	1	0	2	2240	80	2	0	0	0
108105	18591	18473	4	17	neg	v	37	0	0	0	0	0	1	2	3	1	0	0	1	1	1	1	2	0	1	0	2	2240	80	2	0	0	0
108105	18621	18473	5	17	neg	neg	37.2	0	0	0	0	0	1	2	3	1	0	0	1	1	1	1	2	0	0	0	2	2240	80	2	0	0	0
108105	18651	18473	6	17	v	v	37	0	0	160	0	0	1	2	3	1	0	0	1	1	1	1	2	1	1	0	2	2240	80	2	0	0	0
108105	18681	18473	7	17	neg	neg	37.9	0	0	0	0	0	1	2	3	1	0	0	1	1	1	1	2	0	0	0	2	2240	80	2	0	0	0
108105	18711	18473	8	17	neg	neg	36.7	0	0	0	0	0	1	2	3	1	0	0	1	1	1	1	2	0	0	0	2	2240	80	2	0	0	0
108105	18741	18473	9	17	neg	neg	36.9	0	0	0	0	0	1	2	3	1	0	0	1	1	1	1	2	0	0	0	2	2240	80	2	0	0	0
108105	18771	18473	10	17	neg	neg	36.7	0	0	0	0	0	1	2	3	1	0	0	1	1	1	1	2	0	0	0	2	2240	80	2	0	0	0
108105	18801	18473	11	17	neg	neg	36.8	0	0	0	0	0	1	2	3	1	0	0	1	1	1	1	2	0	0	0	2	2240	80	2	0	0	0
108105	18831	18473	12	17	neg	neg	37	0	0	0	0	0	1	2	3	1	0	0	1	1	1	1	2	0	0	0	2	2240	80	2	0	0	0
108105	18861	18473	13	17	neg	neg	37.6	0	0	0	0	0	1	2	3	1	0	0	1	1	1	1	2	0	0	0	2	2240	80	2	0	0	0
108105	18891	18473	14	17	neg	neg	36.8	0	0	0	0	0	1	2	3	1	0	0	1	1	1	1	2	0	0	0	2	2240	80	2	0	0	0
108105	18921	18473	15	17	neg	neg	36.5	0	0	0	0	0	1	2	3	1	0	0	1	1	1	1	2	0	0	0	2	2240	80	2	0	0	0
108105	18951	18473	16	17	neg	neg	36.8	0	0	0	0	0	1	2	3	1	0	0	1	1	1	1	2	0	0	0	2	2240	80	2	0	0	0
108105	18981	18473	17	17	neg	neg	36.8	0	0	0	0	0	1	2	3	1	0	0	1	1	1	1	2	0	0	0	2	2240	80	2	0	0	0
200104	18405	18377	1	20	neg	neg	37	0	0	0	0		2	2	14	1	7	4	3	2	3	2	2	0	0	0	2	9280	0	3	0	0	0
200104	18435	18377	2	20	neg	neg	37.6	0	0	0	0	0	2	2	14	1	7	4	3	2	3	2	2	0	0	0	2	9280	0	3	0	0	0
200104	18465	18377	3	20	neg	neg	36.7	0	0	0	0	0	2	2	14	1	7	4	3	2	3	2	2	0	0	0	2	9280	0	3	0	0	0
200104	18495	18377	4	20	neg	neg	36.6	0	0	0	0	0	2	2	14	1	7	4	3	2	3	2	2	0	0	0	2	9280	0	3	0	0	0
200104	18525	18377	5	20	neg	fv	36.8	0	0	0	0	0	2	2	14	1	7	4	3	2	3	2	2	0	1	0	2	9280	0	3	0	0	0
200104	18555	18377	6	20	neg	neg	37.1	0	0	0	0	0	2	2	14	1	7	4	3	2	3	2	2	0	0	0	2	9280	0	3	0	0	0
200104	18585	18377	7	20	neg	neg	37	0	0	0	0	0	2	2	14	1	7	4	3	2	3	2	2	0	0	0	2	9280	0	3	0	0	0
200104	18615	18377	8	20	neg	neg	36.7	0	0	0	0	0	2	2	14	1	7	4	3	2	3	2	2	0	0	0	2	9280	0	3	0	0	0
200104	18645	18377	9	20	neg	neg	36.7	0	0	0	0	0	2	2	14	1	7	4	3	2	3	2	2	0	0	0	2	9280	0	3	0	0	0
200104	18675	18377	10	20	neg	neg	36.7	0	0	0	0	0	2	2	14	1	7	4	3	2	3	2	2	0	0	0	2	9280	0	3	0	0	0
200104	18705	18377	11	20	neg	neg	36.6	0	0	0	0	0	2	2	14	1	7	4	3	2	3	2	2	0	0	0	2	9280	0	3	0	0	0
200104	18735	18377	12	20	neg	neg	36.8	0	0	0	0	0	2	2	14	1	7	4	3	2	3	2	2	0	0	0	2	9280	0	3	0	0	0
200104	18765	18377	13	20	neg	neg	36.9	0	0	0	0	0	2	2	14	1	7	4	3	2	3	2	2	0	0	0	2	9280	0	3	0	0	0
200104	18795	18377	14	20	neg	neg	36.8	0	0	0	0	0	2	2	14	1	7	4	3	2	3	2	2	0	0	0	2	9280	0	3	0	0	0
200104	18825	18377	15	20	neg	neg	36.6	0	0	0	0	0	2	2	14	1	7	4	3	2	3	2	2	0	0	0	2	9280	0	3	0	0	0
200104	18855	18377	16	20	neg	neg	36.6	0	0	0	0	0	2	2	14	1	7	4	3	2	3	2	2	0	0	0	2	9280	0	3	0	0	0
200104	18885	18377	17	20	neg	neg	36.6	0	0	0	0	0	2	2	14	1	7	4	3	2	3	2	2	0	0	0	2	9280	0	3	0	0	0
200104	18915	18377	18	20	neg	neg	36.7	0	0	0	0	0	2	2	14	1	7	4	3	2	3	2	2	0	0	0	2	9280	0	3	0	0	0
200104	18945	18377	19	20	neg	neg	36.7	0	0	0	0	0	2	2	14	1	7	4	3	2	3	2	2	0	0	0	2	9280	0	3	0	0	0
200104	18975	18377	20	20	neg	neg	36.8	0	0	0	0	0	2	2	14	1	7	4	3	2	3	2	2	0	0	0	2	9280	0	3	0	0	0
200105	18424	18396	1	19	neg	neg	36.6	0	0	0	0		2	1	11	1	5	4	3	2	2	2	2	0	0	0	2	8640	240	3	0	0	0
200105	18454	18396	2	19	neg	neg	36.5	0	0	0	0	0	2	1	11	1	5	4	3	2	2	2	2	0	0	0	2	8640	240	3	0	0	0
200105	18484	18396	3	19	neg	neg	36.5	0	0	0	0	0	2	1	11	1	5	4	3	2	2	2	2	0	0	0	2	8640	240	3	0	0	0
200105	18514	18396	4	19	neg	neg	37.2	0	0	0	0	1	2	1	11	1	5	4	3	2	2	2	2	0	0	0	2	8640	240	3	0	0	0
200105	18544	18396	5	19	neg	neg	37	0	0	0	0	0	2	1	11	1	5	4	3	2	2	2	2	0	0	0	2	8640	240	3	0	0	0
200105	18574	18396	6	19	neg	neg	36.6	0	0	0	0	0	2	1	11	1	5	4	3	2	2	2	2	0	0	0	2	8640	240	3	0	0	0
200105	18604	18396	7	19	neg	neg	37	0	0	0	0	0	2	1	11	1	5	4	3	2	2	2	2	0	0	0	2	8640	240	3	0	0	0
200105	18635	18396	8	19	neg	neg	36.6	0	0	0	0	0	2	1	11	1	5	4	3	2	2	2	2	0	0	0	2	8640	240	3	0	0	0
200105	18664	18396	9	19	neg	neg	36.7	0	0	0	0	0	2	1	11	1	5	4	3	2	2	2	2	0	0	0	2	8640	240	3	0	0	0
200105	18694	18396	10	19	neg	neg	36.6	0	0	0	0	0	2	1	11	1	5	4	3	2	2	2	2	0	0	0	2	8640	240	3	0	0	0
200105	18724	18396	11	19	neg	neg	36.8	0	0	0	0	0	2	1	11	1	5	4	3	2	2	2	2	0	0	0	2	8640	240	3	0	0	0
200105	18754	18396	12	19	neg	neg	36.9	0	0	0	0	0	2	1	11	1	5	4	3	2	2	2	2	0	0	0	2	8640	240	3	0	0	0
200105	18784	18396	13	19	neg	neg	36.6	0	0	0	0	0	2	1	11	1	5	4	3	2	2	2	2	0	0	0	2	8640	240	3	0	0	0
200105	18814	18396	14	19	neg	neg	36.5	0	0	0	0	0	2	1	11	1	5	4	3	2	2	2	2	0	0	0	2	8640	240	3	0	0	0
200105	18844	18396	15	19	neg	neg	36.6	0	0	0	0	0	2	1	11	1	5	4	3	2	2	2	2	0	0	0	2	8640	240	3	0	0	0
200105	18874	18396	16	19	neg	neg	36.7	0	0	0	0	0	2	1	11	1	5	4	3	2	2	2	2	0	0	0	2	8640	240	3	0	0	0
200105	18904	18396	17	19	neg	neg	37	0	0	0	0	0	2	1	11	1	5	4	3	2	2	2	2	0	0	0	2	8640	240	3	0	0	0
200105	18934	18396	18	19	neg	neg	36.8	0	0	0	0	0	2	1	11	1	5	4	3	2	2	2	2	0	0	0	2	8640	240	3	0	0	0
200105	18964	18396	19	19	neg	neg	37	0	0	0	0	0	2	1	11	1	5	4	3	2	2	2	2	0	0	0	2	8640	240	3	0	0	0
[truncated: 2,605 more rows]

## Sheet: variables dictionary
	id	patient ID
	mondate	date and month of visit
	date_entry	date and month of entry
	month_fol	month of followup
	max_montfol	total month followup
	micro	LM results	neg=negative; f=P.falci, v=P.vivax
	pcr	PCR results	neg=negative; f=P.falci, v=P.vivax
	bodtempt	body temperature
	densft	density of trophozoites of P.f at day visite
	densfg	desity of gametocytes of P.f at day visite
	densvt	density of trophozoites of P.v at day visite
	densvg	desity of gametocites of P.v at day visite
	fetwoday	had fever 2 days before	0=no; 1=yes
	villid	village name	village1=1; village2=2; village3=3; village4=4
	sex	sex	man=1; woman=2
	age	age
	ethnic	ethnicity	mnong=1; cadong=2
	educ	education
	occu	occupation	no=0; 1=famer; pupil=4
	eco	income levels	lowest=1; low=2; higher=3
	agegro	age groups	3-9=1; 10-19=2; 20-29=3; 30-60=4
	edulev	education levels	no education=1; elementary=2; secondary and above=3
	bnet	bednet availability	0=no; 1=yes
	season_ent	season entry	0=no; 1=yes
	micro_ev	LM event	0=no; 1=yes
	pcr_ev	PCR event	0=no; 1=yes
	sym_ev	symptomatic event	0=no; 1=yes
	year_entry	year of entry	2009=1; 2010=2
	denstrop0	density of trophozoites of P.v on day 0
	densgame0	density of gametocites of P.v on day 0
	d0vicat	density of trohpzoites of P.v categories	<1000=1; 1001-5000=2; >5000=3
	pfbepv	prior P.f infection before P.v recurrence	0=no; 1=yes
	tremal	treatment before P.v recurrence	0=no; 1=yes
	fal_ev	P.falci events	0=no; 1=yes
